# Supplementary material for: Tailored anticoagulant treatment after a first venous thromboembolism: protocol of the Leiden Thrombosis Recurrence Risk Prevention (L-TRRiP) study - cohort-based randomised controlled trial
Source: PubMed Central journal article supplement — BMJ Open. 2024 Mar 23;14(3):e078676. doi: 10.1136/bmjopen-2023-078676 (PMC10961563; doi:10.1136/bmjopen-2023-078676), 2024-03-23
Supplement: bmjopen-2023-078676.draft_revisions.pdf [file bmjopen-2023-078676.draft_revisions.pdf]

# BMJ Open

BMJ Open is committed to open peer review. As part of this commitment we make the peer review history of every article we publish publicly available.

When an article is published we post the peer reviewers' comments and the authors' responses online. We also post the versions of the paper that were used during peer review. These are the versions that the peer review comments apply to.

The versions of the paper that follow are the versions that were submitted during the peer review process. They are not the versions of record or the final published versions. They should not be cited or distributed as the published version of this manuscript.

BMJ Open is an open access journal and the full, final, typeset and author-corrected version of record of the manuscript is available on our site with no access controls, subscription charges or pay-per-view fees (<http://bmjopen.bmj.com>).

If you have any questions on BMJ Open's open peer review process please email [info.bmjopen@bmj.com](mailto:info.bmjopen@bmj.com)

# BMJ Open

## Tailored anticoagulant treatment after a first venous thromboembolism: Protocol of the Leiden Thrombosis Recurrence Risk Prevention (L-TRRiP) study, a cohort-based randomised controlled trial

|                               |                                                                                                                                                                                                                                                                                                                                                                                                                                                                                                                                                                                                                                                                                                                                                                                                                                                                                                                                                                                                                                                                                                                                                                                                                                                                                                                                                                                                                                                                                                                                                                                                                                                                                                                                                                                                                                                                                                                                                                                                                                                                                                                                                   |
|-------------------------------|---------------------------------------------------------------------------------------------------------------------------------------------------------------------------------------------------------------------------------------------------------------------------------------------------------------------------------------------------------------------------------------------------------------------------------------------------------------------------------------------------------------------------------------------------------------------------------------------------------------------------------------------------------------------------------------------------------------------------------------------------------------------------------------------------------------------------------------------------------------------------------------------------------------------------------------------------------------------------------------------------------------------------------------------------------------------------------------------------------------------------------------------------------------------------------------------------------------------------------------------------------------------------------------------------------------------------------------------------------------------------------------------------------------------------------------------------------------------------------------------------------------------------------------------------------------------------------------------------------------------------------------------------------------------------------------------------------------------------------------------------------------------------------------------------------------------------------------------------------------------------------------------------------------------------------------------------------------------------------------------------------------------------------------------------------------------------------------------------------------------------------------------------|
| Journal:                      | <i>BMJ Open</i>                                                                                                                                                                                                                                                                                                                                                                                                                                                                                                                                                                                                                                                                                                                                                                                                                                                                                                                                                                                                                                                                                                                                                                                                                                                                                                                                                                                                                                                                                                                                                                                                                                                                                                                                                                                                                                                                                                                                                                                                                                                                                                                                   |
| Manuscript ID                 | bmjopen-2023-078676                                                                                                                                                                                                                                                                                                                                                                                                                                                                                                                                                                                                                                                                                                                                                                                                                                                                                                                                                                                                                                                                                                                                                                                                                                                                                                                                                                                                                                                                                                                                                                                                                                                                                                                                                                                                                                                                                                                                                                                                                                                                                                                               |
| Article Type:                 | Protocol                                                                                                                                                                                                                                                                                                                                                                                                                                                                                                                                                                                                                                                                                                                                                                                                                                                                                                                                                                                                                                                                                                                                                                                                                                                                                                                                                                                                                                                                                                                                                                                                                                                                                                                                                                                                                                                                                                                                                                                                                                                                                                                                          |
| Date Submitted by the Author: | 08-Aug-2023                                                                                                                                                                                                                                                                                                                                                                                                                                                                                                                                                                                                                                                                                                                                                                                                                                                                                                                                                                                                                                                                                                                                                                                                                                                                                                                                                                                                                                                                                                                                                                                                                                                                                                                                                                                                                                                                                                                                                                                                                                                                                                                                       |
| Complete List of Authors:     | <p>Burggraaf - van Delft, Louise; Leiden University Medical Center, Clinical Epidemiology<br/> van Rein, Nienke; Leiden University Medical Center, Clinical Epidemiology; Leiden University Medical Center, Department of Clinical Pharmacy and Toxicology<br/> Bemelmans, Remy; Ziekenhuis Gelderse Vallei, Department of Internal Medicine<br/> van den Berg, Jan-Willem; Isala Klinieken, Department of Pulmonology<br/> Bruggeman, Coty; Martini Ziekenhuis, Department of Internal Medicine<br/> Cloos - van Balen, Marissa; Groene Hart Ziekenhuis, Department of Internal Medicine<br/> Coppens, Michiel; Amsterdam UMC Location AMC, Department of Vascular Medicine; Amsterdam Cardiovascular Sciences, Pulmonary Hypertension &amp; Thrombosis<br/> Eefting, Matthijs; Ikazia Ziekenhuis, Department of Internal Medicine<br/> Ende - Verhaar, Yvonne; Medisch Centrum Haaglanden, Department of Internal Medicine<br/> van Es, Nick; Amsterdam UMC Location AMC, Department of Vascular Medicine; Amsterdam Cardiovascular Sciences, Pulmonary Hypertension &amp; Thrombosis<br/> van Guldener, Coen; Amphia Ziekenhuis, Department of Internal Medicine<br/> de Jong, Wouter; Ziekenhuis Gelderse Vallei, Department of Pulmonology<br/> Kleijwegt, Fleur; Rode Kruis Ziekenhuis, Department of Internal Medicine<br/> Koster, Ted; Groene Hart Ziekenhuis, Department of Internal Medicine<br/> Kroon, Cees; Ziekenhuis Nij Smellinghe, Department of Internal Medicine<br/> Kuipers, Saskia; ADRZ, Department of Internal Medicine<br/> Leentjens, Jenneke; Radboud Universiteit Nijmegen, Department of Internal Medicine<br/> Luijten, Dieuwke; Leiden University Medical Center, Department of Medicine - thrombosis and Hemostasis<br/> Mairuhu, Albert; Haga Hospital, Department of Internal Medicine<br/> Meijer, Karina; University of Groningen, Department of Haematology<br/> van de Ree, Marcel; Diaconessenhuis Utrecht Zeist Doorn, Department of Internal Medicine<br/> Roos, Rick; HagaZiekenhuis, Internal Medicine; Leiden University Medical Center, Health Campus The Hague/Department of Public Health and</p> |

|           |                                                                                                                                                                                                                                                                                                                                                                                                                                                                                                                                                                                                                                                                                                                                                                                                                                                                                                                                                                                                                                                                                                                                                                                                   |
|-----------|---------------------------------------------------------------------------------------------------------------------------------------------------------------------------------------------------------------------------------------------------------------------------------------------------------------------------------------------------------------------------------------------------------------------------------------------------------------------------------------------------------------------------------------------------------------------------------------------------------------------------------------------------------------------------------------------------------------------------------------------------------------------------------------------------------------------------------------------------------------------------------------------------------------------------------------------------------------------------------------------------------------------------------------------------------------------------------------------------------------------------------------------------------------------------------------------------|
|           | <p>Primary Care<br/> Schrover, Ilse; Medisch Centrum Leeuwarden, Department of Internal Medicine<br/> Swart, Janneke; Wilhelmina Ziekenhuis Assen WZA, Department of Internal Medicine<br/> van der Velden, Annette; Martini Hospital, Department of Internal Medicine<br/> van den Akker-van Marle, Elske; Leiden University Medical Center, Biomedical Data Sciences<br/> le Cessie, S; Leids Universitair Medisch Centrum, Department of Clinical Epidemiology; Leiden University Medical Center, Department of Biomedical Data Sciences<br/> Geersing, Geert-Jan; Julius Center for Health Sciences and Primary Care, Department of General Practice and Nursing Science<br/> Middeldorp, Saskia; Radboudumc, Department of Internal Medicine<br/> Huisman, Menno; Leiden University Medical Center, Department of Thrombosis and Hemostasis<br/> Klok, Frederikus; Leiden University Medical Center, Department of Thrombosis and Hemostasis<br/> Cannegieter, Suzanne; Leiden University Medical Center, Department of Thrombosis and Hemostasis; Leiden University Medical Center, Department of Clinical Epidemiology<br/> L-TRRiP investigators, .; Leiden University Medical Center</p> |
| Keywords: | Thromboembolism < CARDIOLOGY, Clinical trials < THERAPEUTICS, EPIDEMIOLOGIC STUDIES, Anticoagulation < HAEMATOLOGY                                                                                                                                                                                                                                                                                                                                                                                                                                                                                                                                                                                                                                                                                                                                                                                                                                                                                                                                                                                                                                                                                |
|           |                                                                                                                                                                                                                                                                                                                                                                                                                                                                                                                                                                                                                                                                                                                                                                                                                                                                                                                                                                                                                                                                                                                                                                                                   |

SCHOLARONE™  
Manuscripts

**Title**

Tailored anticoagulant treatment after a first venous thromboembolism: Protocol of the Leiden Thrombosis Recurrence Risk Prevention (L-TRRiP) study, a cohort-based randomised controlled trial

**Authors**

J.L.I. Burggraaf – van Delft<sup>1</sup>, N. van Rein<sup>1,2</sup>, Remy H H Bemelmans<sup>3</sup>, Jan-Willem K van den Berg<sup>4</sup>, Coty Y Bruggeman<sup>5</sup>, Marissa Cloos - van Balen<sup>6</sup>, Michiel Coppens<sup>7,8</sup>, Matthijs Eefting<sup>9</sup>, Yvonne Ende – Verhaar<sup>10</sup>, Nick van Es<sup>7,8</sup>, Coen van Guldener<sup>11</sup>, Wouter K de Jong<sup>12</sup>, Fleur Kleijwegt<sup>13</sup>, Ted Koster<sup>6</sup>, Cees Kroon<sup>14</sup>, Saskia Kuipers<sup>15</sup>, Jenneke Leentjens<sup>16</sup>, Dieuwke Luijten<sup>17</sup>, Albert T A Mairuhu<sup>18</sup>, Karina Meijer<sup>19</sup>, Marcel A van de Ree<sup>20</sup>, Rick Roos<sup>18</sup>, Ilse Schrover<sup>21</sup>, Janneke Swart - Heikens<sup>22</sup>, Annette W G van der Velden<sup>5</sup>, M.E. van den Akker-van Marle<sup>23</sup>, S. le Cessie<sup>1,23</sup>, G.J. Geersing<sup>24</sup>, S. Middeldorp<sup>16</sup>, M.V. Huisman<sup>17</sup>, F.A. Klok<sup>17</sup>, S.C. Cannegieter<sup>1,17</sup>, on behalf of the L-TRRiP Investigators.

**Author affiliations:**

1. Department of Clinical Epidemiology, Leiden University Medical Center, Leiden, the Netherlands
2. Department of Clinical Pharmacy and Toxicology, Leiden University Medical Center, Leiden, the Netherlands
3. Department of Internal Medicine, Ziekenhuis Gelderse Vallei, Ede, the Netherlands
4. Department of Pulmonology, Isala Hospital, Zwolle, the Netherlands
5. Department of Internal Medicine, Martini Ziekenhuis, Groningen, the Netherlands
6. Department of Internal Medicine, Groene Hart Ziekenhuis, Gouda, the Netherlands
7. Department of Vascular Medicine, Amsterdam UMC location, University of Amsterdam, Amsterdam, the Netherlands
8. Amsterdam Cardiovascular Sciences, Pulmonary Hypertension & Thrombosis, Amsterdam, the Netherlands
9. Department of Internal Medicine, Ikazia Ziekenhuis, Rotterdam, the Netherlands
10. Department of Internal Medicine, Haaglanden Medisch Centrum, the Hague, the Netherlands
11. Department of Internal Medicine, Amphia Ziekenhuis, Breda, the Netherlands
12. Department of Pulmonology, Ziekenhuis Gelderse Vallei, Ede, the Netherlands
13. Department of Internal Medicine, Rode Kruis Ziekenhuis, Beverwijk, the Netherlands
14. Department of Internal Medicine, Nij Smellinghe Ziekenhuis, Drachten, the Netherlands
15. Department of Internal Medicine, Adrz, Goes, the Netherlands
16. Department of Internal Medicine, Radboud university medical center, Nijmegen, the Netherlands
17. Department of Medicine – Thrombosis and Hemostasis, Leiden University Medical Center, Leiden, The Netherlands
18. Department of Internal Medicine, Haga Teaching Hospital, the Hague, the Netherlands
19. Department of Hematology, University Medical Center Groningen, Groningen, the Netherlands
20. Department of Internal Medicine, Diaconessen Hospital, Utrecht, the Netherlands

21. Department of Internal Medicine, Medisch Centrum Leeuwarden, Leeuwarden, the Netherlands
22. Department of Internal Medicine, Wilhelmina Ziekenhuis, Assen, the Netherlands
23. Department of Biomedical Data Sciences, Leiden University Medical Center, Leiden, The Netherlands
24. Julius Center for Health Sciences and Primary Care, Department of General Practice and Nursing Science, University Medical Center Utrecht, Utrecht University, Utrecht, The Netherlands

Abstract word count: 297

Total Word count: 4465 (excl. title page, abstract, tables, acknowledgements, contributions and references)

**Corresponding author:**

S.C. Cannegieter

Department of Clinical Epidemiology, C7-P

Leiden University Medical Center

PO Box 9600

2300 RC Leiden

The Netherlands

Tel: +31 715261508

E-mail: S.C.Cannegieter@lumc.nl

## ABSTRACT

### Introduction

Patients with a first venous thromboembolism (VTE) are at risk of recurrence. Recurrent VTE can be prevented by extended anticoagulant therapy, but this comes at the cost of an increased risk of bleeding. It is still uncertain whether patients with an intermediate recurrence risk or with a high recurrence and high bleeding risk will benefit from extended anticoagulant treatment, and whether a strategy where anticoagulant duration is tailored on the predicted risks of recurrent VTE and bleeding can improve outcomes. The aim of the Leiden Thrombosis Recurrence Risk Prevention (L-TRRiP) study is to evaluate the outcomes of tailored duration of long-term anticoagulant treatment based on individualised assessment of recurrent VTE and major bleeding risks.

### Methods and analysis

The L-TRRiP study is a multicentre, open-label, cohort-based, randomised controlled trial, in which patients with a first VTE will be included. We classify the risk of recurrent VTE (low, medium, high) and major bleeding (low, high) using the L-TRRiP and VTE-BLEED scores, respectively. After three months of anticoagulant therapy, patients with a low recurrent VTE risk will discontinue anticoagulant treatment, patients with a high recurrent VTE and low bleeding risk will continue anticoagulant treatment, whereas all other patients will be randomised to continue or discontinue anticoagulant treatment. Inclusion will continue until the randomised group consists of 608 patients. The primary outcome is the combined incidence of recurrent VTE and major bleeding in the randomised group after two years of follow-up. Secondary outcomes include the incidence of recurrent VTE and major bleeding, functional outcomes, quality of life and cost-effectiveness in all patients.

### Ethics and dissemination

1  
2  
3 The protocol was approved by the Medical Research Ethics Committee Leiden – Den Haag –  
4  
5 Delft. Results are expected in 2028 and will be disseminated through peer-reviewed journals and  
6  
7 during (inter)national conferences.  
8  
9

10 **Trial registration number**

11  
12  
13 NL9003, NCTxxxx  
14  
15  
16  
17  
18  
19  
20  
21  
22  
23  
24  
25  
26  
27  
28  
29  
30  
31  
32  
33  
34  
35  
36  
37  
38  
39  
40  
41  
42  
43  
44  
45  
46  
47  
48  
49  
50  
51  
52  
53  
54  
55  
56  
57  
58  
59  
60

For peer review only

### Strengths and limitations of this study

> This is the first randomised trial using prediction models for both risk of recurrent VTE and major bleeding to guide an individualised decision on treatment duration after a first VTE.

> The models can be applied to all patients with a first VTE event without cancer, irrespective of whether this event was provoked or unprovoked.

> After the regular VTE treatment for three months, we will randomise to continuing or discontinuing anticoagulation in patients for whom the risks and benefits of extended anticoagulation are uncertain.

> This is an open-label trial, which might increase cross-over between treatment groups and hence dilute their contrast.



## INTRODUCTION

Patients with a first venous thromboembolism (VTE) are at risk of a recurrent event, especially when the first event was unprovoked. The estimated risk of recurrence in patients with a first unprovoked VTE was 10% in the first year and 36% after ten years,<sup>1</sup> whereas patients with a first VTE provoked by a transient risk factor have an estimated risk of 1-6% in the first year and 3-15% after five years, depending on whether the provoking factor was a minor or major transient risk factor.<sup>2,3</sup> A recurrent VTE has serious consequences with estimated case fatality rates of 4%.<sup>14</sup> In addition, compared with the initial event, recurrent VTE is associated with a higher risk of long-term complications such as post-thrombotic syndrome and chronic thromboembolic pulmonary hypertension.<sup>5,6</sup> Recurrent VTE can be prevented by prolonged oral anticoagulant therapy, but this comes at the cost of an increased risk of major bleeding compared with ceasing treatment.<sup>7,8</sup> A recent meta-analysis reported an overall major bleeding incidence of 1.7 per 100 person-years during extended use of vitamin K antagonists (VKAs) and 1.1 per 100 person-years during extended use of direct oral anticoagulants (DOACs), with a case fatality rate of 8.4%.<sup>9</sup> Importantly, the same meta-analysis reported limited safety information on long-term anticoagulation in VTE patients, in particular for DOAC recipients where information beyond one year of treatment was sparse. Indeed, indefinite use of anticoagulant therapy may result in a significant lifetime risk of major bleeding, a risk that is still to be quantified.

Consequently, the optimal duration of anticoagulant treatment is still under debate. Previously, patients received oral anticoagulant treatment for a fixed period (i.e., 3-6 months) after a first VTE, whereas current guidelines recommend to base treatment duration, (i.e. either a limited period or indefinite duration), on the balance between the risk of recurrent VTE and major bleeding.<sup>10-15</sup> Indefinite treatment should be considered for patients with a first unprovoked VTE given its higher associated recurrence risk, and it is recommended to discontinue anticoagulant treatment after three months for patients with a provoked VTE. However, the definition of provoked

1  
2  
3 VTE varies between guidelines, between centres, and over time, highlighting the clinical ambiguity  
4  
5 surrounding this decision.<sup>16</sup> In addition, basing the decision on treatment duration solely on the  
6  
7 classification of the first event into provoked or unprovoked may be too crude: a study from our  
8  
9 group showed that the c-statistic of the (un)provoked status was only 0.61, indicating that the ability  
10  
11 to distinguish patients at low and high risk of recurrence is limited. In fact, 15% of patients with a  
12  
13 first provoked VTE had a predicted two-years recurrence risk of more than 10%, whereas this risk  
14  
15 was below 10% in 45% of the patients with a first unprovoked VTE.<sup>17</sup> This finding indicates that these  
16  
17 patient groups would have been under- or overtreated if the current guidelines were strictly  
18  
19 followed (without accounting for bleeding risk or patient preferences).<sup>11-15 17</sup> Furthermore, guidelines  
20  
21 advise to take the risk of major bleeding into account, but guidance on how to best assess the risk of  
22  
23 major bleeding and balance this against the risk of VTE is not available.<sup>11-15 18</sup> Moreover, studies  
24  
25 investigating the optimal duration of anticoagulation in relation to patient-relevant outcomes such  
26  
27 as quality of life are lacking.<sup>19</sup> Therefore, in current clinical practice the decision to stop or continue  
28  
29 treatment indefinitely is based on insufficient information. For these reasons, more elaborate  
30  
31 individualised risk stratification in combination with knowledge on the optimal treatment duration,  
32  
33 linked to these risks, is expected to reduce both types of serious complications.  
34  
35  
36  
37  
38  
39

40 Multiple prediction models have been developed to assess the risk of VTE recurrence and  
41  
42 major bleeding in VTE patients.<sup>20 21</sup> At the time we started to design the present study (2018),  
43  
44 models for the prediction of VTE recurrence included the Men and HERDOO2 rule, Vienna prediction  
45  
46 model, DASH score, DAMOVES score, pre- and post D-dimer strategy, Worcester VTE score, and L-  
47  
48 TRRiP model.<sup>17 22-27</sup> Of these, the L-TRRiP model is the only externally validated model that predicts  
49  
50 long-term recurrence risk after a provoked as well as an unprovoked first VTE, which allows for  
51  
52 easier use given the problems related to the distinction between provoked and unprovoked VTE as  
53  
54 described above. In addition, it allows for more precise risk stratification by providing an absolute  
55  
56 recurrence risk, rather than dichotomising high and low recurrence risk. Another advantage of the L-  
57  
58 TRRiP model is that all parameters can be determined *during* anticoagulant treatment, so  
59  
60

1  
2  
3 interruption or discontinuation of the treatment is not required, in contrast to some other models  
4  
5 that include D-dimer, a biomarker predictor that needs to be measured after a short interruption of  
6  
7 anticoagulation. Besides being unpractical, such interruption – albeit relatively rare – may lead to  
8  
9 early recurrent VTE events shortly after discontinuation.<sup>28</sup> Models to predict major bleeding during  
10  
11 anticoagulant therapy have mainly been developed for atrial fibrillation (AF) patients. Examples of  
12  
13 such models are the HAS-BLED score and HEMORR<sub>2</sub>HAGES score.<sup>29 30</sup> Nevertheless, in current clinical  
14  
15 practice these models are sometimes also used to predict major bleeding among VTE patients.<sup>12 18</sup>  
16  
17 However, patient characteristics differ between AF and VTE patients, and the predictive  
18  
19 performance of these models in VTE patients is limited.<sup>20</sup> Therefore, dedicated models for VTE  
20  
21 patients have been developed, which include the score developed by Kuijter et al., the ACCP risk  
22  
23 table, the RIETE score, and VTE-BLEED score.<sup>11 31-34</sup> Of these, the VTE-BLEED score is among the most  
24  
25 externally validated models, has been validated during extended anticoagulant therapy and has  
26  
27 shown a good predictive performance in patients using VKAs as well as in those using DOACs.<sup>18 35-38</sup>  
28  
29  
30  
31  
32

33 In summary, the current strategy to decide on (dis)continuation of anticoagulant treatment  
34  
35 after a first VTE is not optimal since 1) the definition of provoked VTE is subject to debate, 2) the  
36  
37 insufficient discriminative power of a distinction between provoked and unprovoked VTE is  
38  
39 disregarded, and 3) the risk of major bleeding is not properly taken into account. This results in both  
40  
41 over- and undertreatment with anticoagulants in a proportion of patients with a first VTE, leading to  
42  
43 unnecessary high life-time risks of major bleeding or recurrent VTE, respectively. Therefore, in the  
44  
45 Leiden Thrombosis Recurrence Risk Prevention (L-TRRiP) study we aim to evaluate outcomes of  
46  
47 tailored duration of anticoagulant treatment based on individualised risk assessment of a patient's  
48  
49 recurrent VTE and major bleeding risk, using both the L-TRRiP and VTE-BLEED model.  
50  
51  
52  
53  
54  
55  
56

## 57 **METHODS AND ANALYSIS**

### 58 **Study design**

1  
2  
3 The L-TRRiP study is a multicentre, open-label, cohort-based randomised controlled trial. The  
4  
5 L-TRRiP and VTE-BLEED prediction models are used to individually classify patients according to their  
6  
7 risk of recurrent VTE (as low, intermediate, or high) and major bleeding (as low or high), respectively.  
8  
9  
10 After the initial three months, anticoagulant treatment is stopped in patients with a low recurrent  
11  
12 VTE risk, while patients with a high recurrent VTE risk and low major bleeding risk continue  
13  
14 treatment. Patients in the other risk groups (i.e., patients with an intermediate recurrent VTE risk or  
15  
16 a high recurrent VTE risk and high bleeding risk) are randomised to continue or discontinue  
17  
18 anticoagulant treatment (**figure 1**). All patients, both in the non-randomised and randomised arms,  
19  
20 are followed for two years, following the same procedures. Academic hospitals, teaching hospitals,  
21  
22 and general hospitals from the Netherlands participate in this trial. At this time, the trial has started  
23  
24 enrolment in 17 hospitals (see list of collaborators); the first patient was enrolled in June 2021. The  
25  
26 L-TRRiP study is registered at the Dutch Trial Registry: NL9003 and ClinicalTrials.gov: NCTxxxx. The  
27  
28 Standard Protocol Items: Recommendations for Interventional Trials (SPIRIT) guidelines were  
29  
30 followed when drafting the study protocol.  
31  
32  
33  
34  
35  
36  
37

### 38 **Study population**

39  
40  
41 Patients with a first confirmed symptomatic distal or proximal deep venous thrombosis  
42  
43 (DVT) of the lower extremity or pulmonary embolism (PE) with an indication for anticoagulant  
44  
45 treatment for at least three months, aged 18 years or above, who provide informed consent prior to  
46  
47 any study specific procedure, are eligible to participate in this trial. Patients with active cancer,  
48  
49 known antiphospholipid syndrome, those who have an indication other than VTE for prolonged  
50  
51 anticoagulant treatment (e.g., atrial fibrillation) or who have an indication for long-term antiplatelet  
52  
53 therapy in addition to the use of oral anticoagulation (e.g., recent acute coronary syndrome ) at the  
54  
55 time of enrolment will be excluded. Diagnostic testing for malignancy or antiphospholipid syndrome  
56  
57 after the index VTE diagnosis is performed at the discretion of the treating physician. Patients with  
58  
59  
60

1  
2  
3 VTE related to severe COVID-19 (i.e., requiring hospital admission in three months before the index  
4 event) as well as patients with vaccine-induced immune thrombotic thrombocytopenia (VITT) are  
5  
6 not eligible to participate in this trial since the effect of these conditions on recurrence is not known,  
7  
8 and such patients were not included in derivation of the L-TRRiP model.<sup>17</sup>  
9  
10  
11  
12  
13  
14

### 15 **Risk prediction models**

16  
17  
18 The L-TRRiP model includes sex, type and location of VTE, risk factors for VTE, history of  
19 cardiovascular disease as well as blood group non-O and the factor V Leiden mutation to predict the  
20 absolute two-year risk of recurrent VTE. A predicted two-year VTE risk below 6% is classified as low,  
21 a VTE risk of 6-14% as intermediate and a VTE risk above 14% as high (see **Table 1**).<sup>17</sup> The VTE-BLEED  
22 model uses age of 60 years or higher, renal dysfunction, anaemia, history of clinically relevant or  
23 major bleeding, active malignancy, and uncontrolled hypertension in male patients to predict major  
24 bleeding risk. A score <2 is classified as low bleeding risk and a score ≥2 as high bleeding risk (**Table**  
25 **2**).<sup>33</sup>  
26  
27  
28  
29  
30  
31  
32  
33  
34  
35  
36  
37  
38  
39  
40

### 41 **Procedures**

42  
43 After providing informed consent, patients are asked to fill in a questionnaire including  
44 demographic variables, clinical circumstances and risk factors for the first VTE, and past medical  
45 history including previous bleeding. Furthermore, a self-administered buccal swab is taken to assess  
46 the factor V Leiden mutation and ABO blood group by DNA analysis. Information is obtained from  
47 the electronic health records from the hospital including recent haemoglobin level, renal function,  
48 blood pressure, comorbidities, and details regarding the first VTE event (type and location of VTE).  
49  
50  
51  
52  
53  
54  
55

56  
57 Based on this information, the L-TRRiP and VTE-BLEED scores and corresponding risk  
58 categories are calculated in the coordinating centre (Leiden University Medical Center). Depending  
59  
60

1  
2  
3 on the risk category of the patient, a decision on duration of treatment is either made immediately,  
4  
5 or the duration of treatment is randomised (**Figure 1**).  
6  
7

8  
9 When applicable, randomisation is performed shortly before the routine three month visit in  
10 the coordinating centre using the randomisation function in CastorEDC to ensure concealment of  
11 treatment allocation.<sup>39</sup> Randomisation is performed in a 1:1 ratio, using variable block randomisation  
12 with a block size of two, four, or six stratified by study centre, risk group for recurrent VTE and  
13 bleeding to ensure equal distribution of the patients. The treating physician receives the risk  
14 classification of recurrent VTE and major bleeding risk, and the corresponding treatment duration or  
15 outcome of randomisation shortly before the routine three month visit and discusses this with the  
16 patient.  
17  
18  
19  
20  
21  
22  
23  
24  
25  
26

27 Patients who are allocated to continue anticoagulant treatment can remain on the same  
28 anticoagulant or switch anticoagulants at the discretion of their treating physician. In the  
29 Netherlands, DOACs (apixaban, dabigatran, edoxaban, and rivaroxaban) as well as VKAs  
30 (acenocoumarol and phenprocoumon) and low-molecular-weight heparins (LMWHs) are registered  
31 for the treatment of VTE. Dose reduction of apixaban or rivaroxaban according to current guidelines  
32 after the initial six months is allowed, at the discretion of the treating physician. In case the treating  
33 physician and/or patient decides to deviate from the treatment duration, the reasons for deviation  
34 are registered, and patients will complete follow-up as usual.  
35  
36  
37  
38  
39  
40  
41  
42  
43  
44  
45  
46  
47

#### 48 **Follow-up**

49  
50  
51 All patients (both the randomised and the non-randomised groups) are followed for two  
52 years during which they will fill in a standardised questionnaire every three months, which is sent  
53 and processed by the coordinating centre. The follow-up starts at the routine three month visit after  
54 the first VTE, shortly after randomisation, if applicable. The questionnaire is set up to screen for  
55  
56  
57  
58  
59  
60

1  
2  
3 recurrent VTE, (major) bleeding events and other (severe) adverse events. In case of a reported  
4  
5 recurrent VTE or bleeding event, additional information is retrieved from the medical records of the  
6  
7 hospital or general practitioner for adjudication. Adverse events related to the study intervention  
8  
9 are registered. All severe adverse events, including death and non-elective hospitalisation, are  
10  
11 reported to the institutional review board. The questionnaire is also used to evaluate anticoagulant  
12  
13 treatment use and remaining symptoms of VTE. Furthermore, we evaluate quality of life by means of  
14  
15 the EQ-5D-5L questionnaire.<sup>40</sup> Also, functional recovery is assessed using the post-VTE functional  
16  
17 scale (PVFS).<sup>41 42</sup> In order to perform a cost-effectiveness analysis, we measure healthcare  
18  
19 consumption and productivity losses by using Medical Consumption Questionnaire (iMTA MCQ) and  
20  
21 Productivity Costs Questionnaire (iMTA PCQ) from the institute for Medical Technology Assessment.  
22  
23 All questionnaires are offered digitally (via CastorEDC) or by regular mail as preferred by the  
24  
25 participant.  
26  
27  
28  
29

30 Overall, the study is designed to follow general clinical practice as closely as possible, to  
31  
32 optimize generalisability of the results, and to lower the burden for the patients.  
33  
34  
35  
36  
37  
38

### 39 **Outcomes**

40  
41 For the randomised group, the primary outcome is a composite endpoint of recurrent VTE  
42  
43 and major bleeding. Recurrent VTE is diagnosed after clinical suspicion is objectively confirmed by  
44  
45 diagnostic imaging, according to current guidelines.<sup>43 44</sup> Bleeding events will be classified as major,  
46  
47 clinically relevant non-major (CRNMB) or minor according to the current guidelines of the  
48  
49 International Society of Thrombosis and Haemostasis (ISTH): major bleeding is defined as fatal  
50  
51 bleeding, symptomatic bleeding in a critical area or organ or bleeding causing a fall in haemoglobin  
52  
53 level of 2 g/dL (1.24 mmol/L) or more, or leading to transfusion of two or more units of whole blood  
54  
55 or red cells; CRNMB is defined as any bleeding that does not fit the criteria for major bleeding, but  
56  
57  
58  
59  
60

1  
2  
3 does require medical intervention, lead to hospitalisation or increased care level or prompt face to  
4  
5 face evaluation.<sup>45 46</sup>  
6  
7

8 All clinical outcomes will be evaluated and classified by an independent committee blinded  
9  
10 for treatment allocation using discharge letters, radiology reports and other relevant information  
11  
12 retrieved from the medical records. In case of a recurrent VTE or (major) bleeding event, patients  
13  
14 will be treated according to the local clinical practice, meaning that (dis)continuing anticoagulant  
15  
16 treatment at that point is at the discretion of the treating physician.  
17  
18

19  
20 Secondary outcomes are 1) the combined incidence of recurrent VTE and major bleeding  
21  
22 events weighted by the associated loss of quality adjusted life years (QALYs) in the randomised  
23  
24 group; 2) cost-effectiveness of prolonged anticoagulant treatment compared to discontinuation in  
25  
26 the randomised groups; 3) the incidence of recurrent VTE and major bleeding in the non-randomised  
27  
28 groups; 4) the incidence of CRNMB in all groups; 5) the predictive performance (discrimination and  
29  
30 calibration) of the L-TRRiP and VTE-BLEED model in the arms that discontinue and continue,  
31  
32 respectively and 6) the natural course of recovery from a first acute VTE with regard to long-term  
33  
34 functional limitations using the PVFS.  
35  
36  
37  
38  
39  
40  
41

#### 42 **Data collection**

43  
44 Data are collected and stored pseudonymised using the web-based data management  
45  
46 platform CastorEDC.<sup>39</sup> Personal information of included participants is securely shared with the  
47  
48 coordinating centre for them to send the questionnaires and buccal swab and contact the  
49  
50 participants if needed. To optimize data quality, the digital data collection forms include checks for  
51  
52 important study variables, such as range checks for continuous variables, check of the assigned risk  
53  
54 categories, and verification of relevant medical history included in the prediction models by both the  
55  
56 study team as well as the patient (via the baseline questionnaire).  
57  
58  
59  
60



### Sample size calculation

The sample size of this study is based on the randomised part of the study. Based on the estimated risks of recurrent VTE and major bleeding as observed in the derivation studies of both prediction models,<sup>17 33</sup> we assume an overall two-year recurrent VTE risk of 10% in the discontinuation arm of the randomised groups and a major bleeding risk of 0.6%. Assuming a reduction of the recurrent VTE risk of 85% by anticoagulant treatment, the recurrent VTE risk of the group that continues anticoagulant treatment will be 1.5%. Furthermore, we estimate this will lead to an increase in the overall risk of major bleeding to 2.1%. To demonstrate a 7% absolute difference in the combined endpoint (i.e., 10.6% vs 3.6%) with an alpha of 0.05 and a power of 90%, we need a sample size of 552 subjects for the randomised part of the study. Taking into account a drop-out rate of 10%, we aim to include 608 patients in the randomised part of the study. Based on the derivation studies we expect the randomised group to form about 38% of the total included population, in which case we expect to include approximately 1600 patients in total; 848 (53%) in the low VTE recurrence risk group and 144 (9%) in the high recurrence and low bleeding risk group.<sup>17 33</sup> Of note, these numbers may change depending on the final proportion of the randomised group.

### Data analysis plan

Baseline characteristics will be summarised using descriptive statistics (mean, standard deviation [SD] or median, interquartile range (IQR); number, percentage). Furthermore, we will present the number of patients who continued anticoagulant treatment while being allocated to discontinuation and vice versa (cross-over), including the reason for switching anticoagulant treatment. In case of missing data we will perform multiple imputation if indicated (depending on the amount and nature of the missingness) and pool the results according to Rubin's rules.<sup>47</sup>

1  
2  
3 *Randomised group:*  
4  
5

6           Following an intention-to-treat analysis, the cumulative incidence of the primary outcome in  
7  
8 the randomised group will be estimated using the cumulative incidence competing risk method,  
9  
10 accounting for the competing risk of death from other causes than VTE or major bleeding. Follow-up  
11  
12 will start at the time of the three month visit. We will censor patients when they withdraw informed  
13  
14 consent, are lost to follow-up, or reach the end of the study follow-up period. Hazard ratios (HRs)  
15  
16 and corresponding 95% confidence intervals (CIs) will be estimated using a Cox regression model.  
17  
18

19  
20           As secondary analyses, we will perform a per-protocol analysis, in which patients who did  
21  
22 not receive the allocated treatment during the complete follow up will be censored at the time of  
23  
24 the protocol deviation. In case of a different distribution of risk factors between the treatment  
25  
26 groups due to chance, adjusted HRs and 95% CIs will be estimated. The primary outcome (i.e.,  
27  
28 recurrent VTE and major bleeding) will be weighted for the impact on quality of life (EQ-5D) and  
29  
30 functional limitations (PFVS) (in two separate analyses) using the difference between the measures  
31  
32 taken after and the last one before the event as weights. Furthermore, we will estimate the  
33  
34 incidence of CRNMB and assess repeated events (e.g. CRNMB followed by major bleeding) using  
35  
36 negative binomial regression.  
37  
38  
39

40  
41           Health-care costs will be calculated using Dutch standard prices for economic evaluations.<sup>48</sup>  
42

43  
44 <sup>49</sup> Absence from work will be valued with friction cost method. QALYs will be assessed using the EQ-  
45  
46 5D-5L scores (Dutch tariff<sup>50</sup>) at different timepoints, using the area-under-the-curve approach. The  
47  
48 economic evaluation will consist of a cost-effectiveness analysis, comparing costs per event, as well  
49  
50 as a cost-utility analysis, comparing costs per QALY. In net-benefit analysis, costs will be related to  
51  
52 effectiveness and presented in a cost-effectiveness acceptability curve.  
53  
54

55 *Non-randomised group:*  
56  
57  
58  
59  
60

1  
2  
3 The two-years cumulative incidences of recurrent VTE, major bleeding and CRNMB in the  
4 non-randomised groups will be calculated, using the same approach as in randomised groups.  
5  
6

7  
8 *All participants:*  
9

10  
11 We will assess the difference in recommended treatment duration as allocated in the study  
12 to treatment duration according to the guidelines (i.e. continuation in unprovoked and  
13 discontinuation in provoked VTE). We will determine the predictive performance of the L-TRRiP  
14 model in all patients that discontinued anticoagulant treatment (since the L-TRRiP model is  
15 developed to predict the risk of VTE recurrence after discontinuation) by creating a calibration plot  
16 containing the observed and predicted two-years risks of recurrent VTE. Likewise, we will determine  
17 the predictive performance of the VTE-BLEED model in all patients who continued anticoagulant  
18 treatment, although observed risks will be plotted against the total score as absolute predicted risks  
19 are not provided by the model. For the analysis of functional recovery, an ordinal logistic regression  
20 model will be used.  
21  
22  
23  
24  
25  
26  
27  
28  
29  
30  
31  
32  
33  
34  
35  
36

37 **Patient and Public Involvement statement**  
38

39 The L-TRRiP study is investigator initiated. An advisory board, consisting of five patients with  
40 a history of VTE, is involved in the practical implementation of the trial, such as patient recruitment  
41 and dissemination of study results among patients. In order to make the results of the study  
42 accessible to patients, we will publish a Dutch summary.  
43  
44  
45  
46  
47  
48  
49  
50  
51

52 **ETHICS AND DISSEMINATION**  
53

54 The L-TRRiP study will be conducted according to the principles of Good Research Practice and in  
55 accordance with the applying Dutch laws (the Medical Research Involving Human Subjects Act  
56 [WMO] and General Data Protection Regulation [GDPR]). The protocol is approved by the Medical  
57  
58  
59  
60

1  
2  
3 Research Ethics Committee Leiden – Den Haag - Delft, the Netherlands. Monitoring will be executed  
4  
5 by monitors working for the coordinating centre who are independent of the study investigators, to  
6  
7 ensure compliance with the protocol, Good Research Practice and legal aspects.  
8  
9

10 Results are expected in 2028. Our aim is to disseminate the results by publication in peer-  
11  
12 reviewed journals, professional societies, and through presentations on (inter)national conferences  
13  
14 according to publication standards. After data collection and data cleaning are finished, deidentified  
15  
16 data will be registered in a repository and be made available for further research upon reasonable  
17  
18 request to the corresponding author.  
19  
20  
21  
22  
23  
24

## 25 **DISCUSSION**

26  
27  
28 The L-TRRiP study aims to optimize the duration of anticoagulant treatment in patients with  
29  
30 a first VTE based on an individual assessment of the risk of recurrent VTE as well as major bleeding.  
31  
32 The L-TRRiP study will show whether in patients who have an intermediate risk of recurrent VTE or a  
33  
34 high risk of both recurrent VTE and major bleeding (i.e., the randomised group), prolonged  
35  
36 anticoagulant treatment is beneficial compared with discontinuing regarding the combined  
37  
38 incidence of recurrent VTE and major bleeding events, as well as regarding quality of life, cost-  
39  
40 effectiveness and functional outcomes, which are all important outcomes in VTE patients.<sup>42</sup> Next to  
41  
42 this, we will assess the predictive performance of the L-TRRiP and VTE-BLEED models in all patients  
43  
44 who had to stop or continue anticoagulant treatment, respectively, to determine whether the  
45  
46 applied strategy was able to correctly classify patients in different risk groups. Furthermore, we will  
47  
48 determine (the course of) functional limitations and quality of life after a first VTE for all patients.  
49  
50  
51  
52

53 Previous attempts have been made to optimize the length of treatment of patients after a  
54  
55 first VTE based on individualised assessment of recurrent VTE risk.<sup>28 51</sup> One study showed a clear  
56  
57 benefit of prolonged anticoagulant treatment compared with discontinuation on recurrent VTE in  
58  
59  
60

1  
2  
3 patients with an unprovoked VTE and elevated d-dimer levels one month after ceasing anticoagulant  
4 treatment (2.9% vs 15% during 9-18 months follow-up respectively).<sup>51</sup> However, the incidence of  
5 recurrent VTE in patients with normal d-dimer levels (in whom anticoagulation was therefore  
6 stopped) was still high (6-7% per patient-year).<sup>51 52</sup> This indicates that d-dimer alone does not  
7 differentiate well enough between patients who should continue or discontinue anticoagulant  
8 therapy. Another study showed that prolonging anticoagulant treatment based on the Vienna score  
9 versus routine clinical care did not improve overall clinical outcome in the randomised groups, albeit  
10 that the risk of actual recurrent VTE was indeed low in those with a low predicted risk based upon  
11 the Vienna score.<sup>28</sup> Likewise, a management study implementing the HERDOO2 rule showed that  
12 women with a low predicted recurrence risk had indeed a low risk of VTE recurrence after  
13 anticoagulant discontinuation.<sup>53</sup> However, the majority of these women had a VTE during estrogen  
14 use, which in contrast to current standards, was classified as unprovoked. As far as we know, these  
15 are the only studies in which a form of individualised risk assessment was used to determine  
16 treatment duration after a first VTE. However, these studies did not include patients with a first  
17 provoked VTE nor take the bleeding risk of patients into account and did not provide a sufficiently  
18 effective strategy for a targeted treatment duration based on individual risk assessment.  
19  
20  
21  
22  
23  
24  
25  
26  
27  
28  
29  
30  
31  
32  
33  
34  
35  
36  
37  
38  
39  
40  
41  
42

### 43 **Limitations and strengths**

44  
45 The L-TRRiP study has several strengths. First, treatment continuation will be randomised for  
46 risk categories with an unknown balance between harm and benefit of prolonged treatment.  
47  
48 Second, we incorporate the predicted risk of bleeding into the decision to (dis)continue  
49 anticoagulant therapy. Third, the models can be applied to all patients with a first VTE, irrespective  
50 of whether the event was provoked or unprovoked and thereby avoiding the problems associated  
51 with the distinction between these events. Fourth, we follow the usual clinical procedures,  
52 including those for diagnosis of VTE recurrence and bleeding as much as possible, hence increasing  
53  
54  
55  
56  
57  
58  
59  
60

1  
2  
3 the generalisability of the results. Last, we incorporate patient-reported outcomes and cost-  
4 effectiveness, which enable us to interpret the primary outcomes in the perspective of the patient  
5 (impact on quality of life and functional limitations) and society (costs, loss of work productivity).  
6  
7  
8  
9

10 A potential limitation is that this is an open-label trial, which might increase the number of  
11 deviations from the treatment allocation. However, the choice for an open-label design was a  
12 deliberate decision, since such deviations will reflect clinical practice. Furthermore, we are not  
13 studying a treatment (the efficacy and safety of the used medication is well known) but a treatment  
14 strategy. Also, we expect these deviations will not happen at a large scale, given the uncertainty  
15 about (dis)continuing anticoagulation in these groups. Another potential limitation of the open-label  
16 design is that it might influence the assessment and reporting of study outcomes by the patient or  
17 treating physicians. However, we use well defined clinical outcomes (i.e., recurrent VTE and major  
18 bleeding) as primary outcome and all events will be evaluated by a blinded outcome assessment  
19 committee. A second limitation is that the first indication that a study outcome has occurred is  
20 based on questionnaires, which makes outcome detection dependent on the willingness to fill in the  
21 questionnaire and on the accuracy of the answers of the participants or of the reporting of the  
22 treating physician. However, to stimulate a high response rate, we will contact patients by telephone  
23 when they do not return the questionnaire. In addition, at the time of inclusion patients provide  
24 consent to request information on recurrent VTE and bleeding from their treating physician and  
25 general practitioner, which allows us to collect information from them and detect the primary  
26 outcomes even if a patient does not respond to the questionnaires. Lastly, it is a limitation that the  
27 L-TRRiP model only provides a two-years predicted risk of VTE recurrence, which is a limited  
28 prediction horizon given that continued treatment is indefinitely.  
29  
30  
31  
32  
33  
34  
35  
36  
37  
38  
39  
40  
41  
42  
43  
44  
45  
46  
47  
48  
49  
50  
51  
52  
53  
54  
55  
56  
57  
58  
59  
60

## Conclusion

In summary, the L-TRRIP study is the first open-label, cohort-based, randomised controlled trial that applies individualised risk assessment to determine anticoagulant treatment duration in patients with a first VTE. Thereby, this trial will provide insight on the optimal treatment duration of anticoagulants in patients with a first VTE through which it is expected that eventually, both thrombotic and bleeding complications will be minimised in this large patient group.

## REFERENCES

1. Khan F, Rahman A, Carrier M, et al. Long term risk of symptomatic recurrent venous thromboembolism after discontinuation of anticoagulant treatment for first unprovoked venous thromboembolism event: systematic review and meta-analysis. *BMJ* 2019;366:l4363. doi: 10.1136/bmj.l4363 %J BMJ
2. Iorio A, Kearon C, Filippucci E, et al. Risk of recurrence after a first episode of symptomatic venous thromboembolism provoked by a transient risk factor: a systematic review. *Arch Intern Med* 2010;170(19):1710-6. doi: 10.1001/archinternmed.2010.367 [published Online First: 2010/10/27]
3. Weitz JI, Prandoni P, Verhamme P. Anticoagulation for Patients with Venous Thromboembolism: When is Extended Treatment Required? *TH Open* 2020;4(4):e446-e56. doi: 10.1055/s-0040-1721735
4. Carrier M, Le Gal G, Wells PS, et al. Systematic review: case-fatality rates of recurrent venous thromboembolism and major bleeding events among patients treated for venous thromboembolism. *Ann Intern Med* 2010;152(9):578-89. doi: 10.7326/0003-4819-152-9-201005040-00008 [published Online First: 2010/05/05]
5. Kahn SR, Shrier I, Julian JA, et al. Determinants and time course of the postthrombotic syndrome after acute deep venous thrombosis. *Ann Intern Med* 2008;149(10):698-707. doi: 10.7326/0003-4819-149-10-200811180-00004 [published Online First: 2008/11/20]
6. Ende-Verhaar YM, Cannegieter SC, Vonk Noordegraaf A, et al. Incidence of chronic thromboembolic pulmonary hypertension after acute pulmonary embolism: a contemporary view of the published literature. *Eur Respir J* 2017;49(2) doi: 10.1183/13993003.01792-2016 [published Online First: 2017/02/25]
7. Middeldorp S, Prins MH, Hutten BA. Duration of treatment with vitamin K antagonists in symptomatic venous thromboembolism. *Cochrane Database Syst Rev* 2014;2014(8):Cd001367. doi: 10.1002/14651858.CD001367.pub3 [published Online First: 2014/08/06]
8. Khan F, Tritschler T, Kimpton M, et al. Long-term Risk of Recurrent Venous Thromboembolism Among Patients Receiving Extended Oral Anticoagulant Therapy for First Unprovoked Venous Thromboembolism.n/a(n/a) doi: <https://doi.org/10.1111/jth.15491>
9. Khan F, Tritschler T, Kimpton M, et al. Long-Term Risk for Major Bleeding During Extended Oral Anticoagulant Therapy for First Unprovoked Venous Thromboembolism : A Systematic Review and Meta-analysis. *Ann Intern Med* 2021;174(10):1420-29. doi: 10.7326/m21-1094 [published Online First: 2021/09/14]
10. Baglin T, Bauer K, Douketis J, et al. Duration of anticoagulant therapy after a first episode of an unprovoked pulmonary embolus or deep vein thrombosis: guidance from the SSC of the

- 1  
2  
3 ISTH. *J Thromb Haemost* 2012;10(4):698-702. doi: 10.1111/j.1538-7836.2012.04662.x  
4 [published Online First: 2012/02/16]  
5  
6 11. Kearon C, Akl EA, Ornelas J, et al. Antithrombotic Therapy for VTE Disease: CHEST Guideline and  
7 Expert Panel Report. *Chest* 2016;149(2):315-52. doi: 10.1016/j.chest.2015.11.026 [published  
8 Online First: 2016/02/13]  
9  
10 12. NICE. Venous thromboembolic diseases: diagnosis, management and thrombophilia testing.  
11 *National Institute for Health and Care Excellence, London* 2020  
12  
13 13. Konstantinides SV, Meyer G, Becattini C, et al. 2019 ESC Guidelines for the diagnosis and  
14 management of acute pulmonary embolism developed in collaboration with the European  
15 Respiratory Society (ERS). *Eur Heart J* 2020;41(4):543-603. doi: 10.1093/eurheartj/ehz405  
16 [published Online First: 2019/09/11]  
17  
18 14. Ortel TL, Neumann I, Ageno W, et al. American Society of Hematology 2020 guidelines for  
19 management of venous thromboembolism: treatment of deep vein thrombosis and  
20 pulmonary embolism. *Blood Adv* 2020;4(19):4693-738. doi:  
21 10.1182/bloodadvances.2020001830 [published Online First: 2020/10/03]  
22  
23 15. Stevens SM, Woller SC, Kreuziger LB, et al. Antithrombotic Therapy for VTE Disease: Second  
24 Update of the CHEST Guideline and Expert Panel Report. *Chest* 2021;160(6):e545-e608. doi:  
25 10.1016/j.chest.2021.07.055 [published Online First: 2021/08/06]  
26  
27 16. Kearon C, Ageno W, Cannegieter SC, et al. Categorization of patients as having provoked or  
28 unprovoked venous thromboembolism: guidance from the SSC of ISTH. *J Thromb Haemost*  
29 2016;14(7):1480-3. doi: 10.1111/jth.13336 [published Online First: 2016/07/20]  
30  
31 17. Timp JF, Braekkan SK, Lijfering WM, et al. Prediction of recurrent venous thrombosis in all  
32 patients with a first venous thrombotic event: The Leiden Thrombosis Recurrence Risk  
33 Prediction model (L-TRRiP). *PLoS Med* 2019;16(10):e1002883. doi:  
34 10.1371/journal.pmed.1002883 [published Online First: 2019/10/12]  
35  
36 18. den Exter PL, Woller SC, Robert-Ebadi H, et al. Management of bleeding risk in patients who  
37 receive anticoagulant therapy for venous thromboembolism: Communication from the ISTH  
38 SSC Subcommittee on Predictive and Diagnostic Variables in Thrombotic Disease. *J Thromb*  
39 *Haemost* 2022;20(8):1910-19. doi: 10.1111/jth.15776 [published Online First: 2022/06/24]  
40  
41 19. de Jong CMM, Rosovsky RP, Klok FA. Outcomes of venous thromboembolism care: future  
42 directions. *J Thromb Haemost* 2023 doi: 10.1016/j.jtha.2023.02.015 [published Online First:  
43 2023/03/03]  
44  
45 20. de Winter MA, van Es N, Büller HR, et al. Prediction models for recurrence and bleeding in  
46 patients with venous thromboembolism: A systematic review and critical appraisal. *Thromb*  
47 *Res* 2021;199:85-96. doi: 10.1016/j.thromres.2020.12.031 [published Online First:  
48 2021/01/24]  
49  
50 21. Burggraaf JLI, van Rein N, Klok FA, et al. How to predict recurrent venous thromboembolism and  
51 bleeding? A review of recent advances and their implications. *Pol Arch Intern Med*  
52 2023;133(5) doi: 10.20452/pamw.16492 [published Online First: 2023/05/08]  
53  
54 22. Rodger MA, Kahn SR, Wells PS, et al. Identifying unprovoked thromboembolism patients at low  
55 risk for recurrence who can discontinue anticoagulant therapy. *CMAJ* 2008;179(5):417-26.  
56 doi: 10.1503/cmaj.080493 [published Online First: 2008/08/30]  
57  
58 23. Eichinger S, Heinze G, Jandeck LM, et al. Risk assessment of recurrence in patients with  
59 unprovoked deep vein thrombosis or pulmonary embolism: the Vienna prediction model.  
60 *Circulation* 2010;121(14):1630-6. doi: 10.1161/circulationaha.109.925214 [published Online  
First: 2010/03/31]  
24. Tosetto A, Iorio A, Marcucci M, et al. Predicting disease recurrence in patients with previous  
unprovoked venous thromboembolism: a proposed prediction score (DASH). *J Thromb*  
*Haemost* 2012;10(6):1019-25. doi: 10.1111/j.1538-7836.2012.04735.x [published Online  
First: 2012/04/12]



- 1
- 2
- 3
- 4 25. Franco Moreno AI, García Navarro MJ, Ortiz Sánchez J, et al. A risk score for prediction of
- 5 recurrence in patients with unprovoked venous thromboembolism (DAMOVES). *Eur J Intern*
- 6 *Med* 2016;29:59-64. doi: 10.1016/j.ejim.2015.12.010 [published Online First: 2016/01/18]
- 7
- 8 26. Ensor J, Riley RD, Jowett S, et al. Prediction of risk of recurrence of venous thromboembolism
- 9 following treatment for a first unprovoked venous thromboembolism: systematic review,
- 10 prognostic model and clinical decision rule, and economic evaluation. *Health Technol Assess*
- 11 2016;20(12):i-xxxiii, 1-190. doi: 10.3310/hta20120 [published Online First: 2016/02/18]
- 12
- 13 27. Huang W, Goldberg RJ, Anderson FA, et al. Occurrence and predictors of recurrence after a first
- 14 episode of acute venous thromboembolism: population-based Worcester Venous
- 15 Thromboembolism Study. *J Thromb Thrombolysis* 2016;41(3):525-38. doi: 10.1007/s11239-
- 16 015-1301-8 [published Online First: 2016/02/06]
- 17
- 18 28. Geersing GJ, Hendriksen JMT, Zuithoff NPA, et al. Effect of tailoring anticoagulant treatment
- 19 duration by applying a recurrence risk prediction model in patients with venous
- 20 thromboembolism compared to usual care: A randomized controlled trial. *PLoS Med*
- 21 2020;17(6):e1003142. doi: 10.1371/journal.pmed.1003142 [published Online First:
- 22 2020/06/27]
- 23
- 24 29. Pisters R, Lane DA, Nieuwlaar R, et al. A novel user-friendly score (HAS-BLED) to assess 1-year risk
- 25 of major bleeding in patients with atrial fibrillation: the Euro Heart Survey. *Chest*
- 26 2010;138(5):1093-100. doi: 10.1378/chest.10-0134 [published Online First: 2010/03/20]
- 27
- 28 30. Gage BF, Yan Y, Milligan PE, et al. Clinical classification schemes for predicting hemorrhage:
- 29 results from the National Registry of Atrial Fibrillation (NRAF). *Am Heart J* 2006;151(3):713-9.
- 30 doi: 10.1016/j.ahj.2005.04.017 [published Online First: 2006/03/01]
- 31
- 32 31. Kuijter PM, Hutten BA, Prins MH, et al. Prediction of the risk of bleeding during anticoagulant
- 33 treatment for venous thromboembolism. *Arch Intern Med* 1999;159(5):457-60. doi:
- 34 10.1001/archinte.159.5.457 [published Online First: 1999/03/13]
- 35
- 36 32. Ruíz-Giménez N, Suárez C, González R, et al. Predictive variables for major bleeding events in
- 37 patients presenting with documented acute venous thromboembolism. Findings from the
- 38 RIETE Registry. *Thromb Haemost* 2008;100(1):26-31. doi: 10.1160/th08-03-0193 [published
- 39 Online First: 2008/07/10]
- 40
- 41 33. Klok FA, Hosel V, Clemens A, et al. Prediction of bleeding events in patients with venous
- 42 thromboembolism on stable anticoagulation treatment. *Eur Respir J* 2016;48(5):1369-76.
- 43 doi: 10.1183/13993003.00280-2016 [published Online First: 2016/11/02]
- 44
- 45 34. Kearon C, Akl EA, Comerota AJ, et al. Antithrombotic therapy for VTE disease: Antithrombotic
- 46 Therapy and Prevention of Thrombosis, 9th ed: American College of Chest Physicians
- 47 Evidence-Based Clinical Practice Guidelines. *Chest* 2012;141(2 Suppl):e419S-e96S. doi:
- 48 10.1378/chest.11-2301 [published Online First: 2012/02/15]
- 49
- 50 35. Klok FA, Barco S, Konstantinides SV. External validation of the VTE-BLEED score for predicting
- 51 major bleeding in stable anticoagulated patients with venous thromboembolism. *Thromb*
- 52 *Haemost* 2017;117(6):1164-70. doi: 10.1160/th16-10-0810 [published Online First:
- 53 2017/03/10]
- 54
- 55 36. Klok FA, Barco S, Turpie AGG, et al. Predictive value of venous thromboembolism (VTE)-BLEED to
- 56 predict major bleeding and other adverse events in a practice-based cohort of patients with
- 57 VTE: results of the XALIA study. *Br J Haematol* 2018;183(3):457-65. doi: 10.1111/bjh.15533
- 58 [published Online First: 2018/08/21]
- 59
- 60 37. Klok FA, Huisman MV. How I assess and manage the risk of bleeding in patients treated for
- venous thromboembolism. *Blood* 2020;135(10):724-34. doi: 10.1182/blood.2019001605
- [published Online First: 2020/01/18]
38. Nishimoto Y, Yamashita Y, Morimoto T, et al. Validation of the VTE-BLEED score's long-term
- performance for major bleeding in patients with venous thromboembolisms: From the
- COMMAND VTE registry. *J Thromb Haemost* 2020;18(3):624-32. doi: 10.1111/jth.14691
- [published Online First: 2019/12/01]

- 1
- 2
- 3
- 4 39. Castor EDC. Castor Electronic Data Capture 2019 [27 Aug. 2019]. Available from:  
5 <https://castoredc.com> accessed August 28, 2019.
- 6 40. Herdman M, Gudex C, Lloyd A, et al. Development and preliminary testing of the new five-level  
7 version of EQ-5D (EQ-5D-5L). *Quality of life research : an international journal of quality of*  
8 *life aspects of treatment, care and rehabilitation* 2011;20(10):1727-36. doi: 10.1007/s11136-  
9 011-9903-x [published Online First: 2011/04/12]
- 10 41. Boon G, Barco S, Bertolotti L, et al. Measuring functional limitations after venous  
11 thromboembolism: Optimization of the Post-VTE Functional Status (PVFS) Scale. *Thromb Res*  
12 2020;190:45-51. doi: 10.1016/j.thromres.2020.03.020 [published Online First: 2020/04/17]
- 13 42. Gwozdz AM, de Jong CMM, Fialho LS, et al. Development of an international standard set of  
14 outcome measures for patients with venous thromboembolism: an International Consortium  
15 for Health Outcomes Measurement consensus recommendation. *The Lancet Haematology*  
16 2022;9(9):e698-e706. doi: 10.1016/s2352-3026(22)00215-0
- 17 43. Diagnostiek, preventie en behandeling van veneuze trombo-embolie en secundaire preventie  
18 van arteriële trombose: Kwaliteitsinstituut voor de Gezondheidszorg CBO, 2008.
- 19 44. Richtlijn Antitrombotisch beleid - Continueren antistolling na acute veneuze tromboembolie:  
20 Federatie Medisch Specialisten; [updated 15-11-2021; cited 2022 02-11-2022]. Available  
21 from:  
22 [https://richtlijndatabase.nl/richtlijn/antitrombotisch\\_beleid/therapie\\_vte/continueren\\_a](https://richtlijndatabase.nl/richtlijn/antitrombotisch_beleid/therapie_vte/continueren_antistolling_na_acute_veneuze_tromboembolie.html)  
23 [ntistolling\\_na\\_acute\\_veneuze\\_tromboembolie.html](https://richtlijndatabase.nl/richtlijn/antitrombotisch_beleid/therapie_vte/continueren_antistolling_na_acute_veneuze_tromboembolie.html).
- 24 45. Kaatz S, Ahmad D, Spyropoulos AC, et al. Definition of clinically relevant non-major bleeding in  
25 studies of anticoagulants in atrial fibrillation and venous thromboembolic disease in non-  
26 surgical patients: communication from the SSC of the ISTH. 2015;13(11):2119-26. doi:  
27 10.1111/jth.13140
- 28 46. Schulman S, Kearon C. Definition of major bleeding in clinical investigations of antihemostatic  
29 medicinal products in non-surgical patients. *J Thromb Haemost* 2005;3(4):692-4. doi:  
30 10.1111/j.1538-7836.2005.01204.x [published Online First: 2005/04/22]
- 31 47. Rubin D. Multiple Imputation for Nonresponse in Surveys Wiley J&Sons New York. 1987
- 32 48. Hakkaart-van Roijen L, van der Linden N, Bouwmans CAM, et al. Costing manual: Methodology of  
33 costing research and reference prices for economic evaluations in healthcare [in Dutch:  
34 *Kostenhandleiding: Methodologie van kostenonderzoek en referentieprijzen voor*  
35 *economische evaluaties in de gezondheidszorg*]. . 2015
- 36 49. Kanters TA, Bouwmans CAM, van der Linden N, et al. Update of the Dutch manual for costing  
37 studies in health care. *PloS One* 2017;12(11):e0187477. doi: 10.1371/journal.pone.0187477  
38 [published Online First: 2017/11/10]
- 39 50. M MV, K MV, S MAAE, et al. Dutch Tariff for the Five-Level Version of EQ-5D. *Value in health : the*  
40 *journal of the International Society for Pharmacoeconomics and Outcomes Research*  
41 2016;19(4):343-52. doi: 10.1016/j.jval.2016.01.003 [published Online First: 2016/06/22]
- 42 51. Palareti G, Cosmi B, Legnani C, et al. D-dimer testing to determine the duration of  
43 anticoagulation therapy. *N Engl J Med* 2006;355(17):1780-9. doi: 10.1056/NEJMoa054444  
44 [published Online First: 2006/10/27]
- 45 52. Kearon C, Spencer FA, O'Keefe D, et al. D-dimer testing to select patients with a first unprovoked  
46 venous thromboembolism who can stop anticoagulant therapy: a cohort study. *Ann Intern*  
47 *Med* 2015;162(1):27-34. doi: 10.7326/m14-1275 [published Online First: 2015/01/07]
- 48 53. Rodger MA, Le Gal G, Anderson DR, et al. Validating the HERDOO2 rule to guide treatment  
49 duration for women with unprovoked venous thrombosis: multinational prospective cohort  
50 management study. *BMJ* 2017;356:j1065. doi: 10.1136/bmj.j1065 [published Online First:  
51 2017/03/21]
- 52
- 53
- 54
- 55
- 56
- 57
- 58
- 59
- 60

### Authors contributions

SCC, MVH, FAK, GJG and SM designed the study. EvdA-vM (health-care economics) and SIC (statistics) contributed to the parts in the protocol on their specific disciplines. JLIB wrote the first manuscript draft. All authors revised the manuscript and gave final approval of the version to be published.

### Acknowledgements

The authors especially acknowledge the participating centres (see **Appendix I**) and the Dutch Thrombosis Network.

### Collaborators

The L-TRRiP Investigators: see **Appendix I**.

### Funding statement

The L-TRRiP study is supported by ZonMw (program Goed Gebruik Geneesmiddelen), the Netherlands; grant number: 848017007. The funder did not participate in the design of the study and will have no role in the study conduct, data analysis, interpretation and publication of the data.

### Conflicts of interest statement

**MC** has received financial support for research from Bayer, CSL Behring, Roche, Novo Nordisk, and UniQure and fees for lecturing or consultancy from Alexion, Bayer, CSL Behring, Daiichi Sankyo, Sobi, and Viatrix, all unrelated to the present work and paid to his institution. **NvE** has received a lecture

1  
2  
3 fee from Bristol Myers Squibb, which was unrelated to this work and paid to his institution. **JL**  
4  
5 reports grants or contracts from BMS-Pfizer, Viatris, AstraZeneca en Synapse, all unrelated to this  
6  
7 work and paid to her institution. **KM** reports speaker fees from Alexion, Bayer and CSL Behring,  
8  
9 participation in trial steering committees for Bayer and Astra Zeneca, consulting fees from Uniqure,  
10  
11 participation in data monitoring and endpoint adjudication committee for Octapharma. All payments  
12  
13 are made to her institution. **SM** reports grants and personal fees from Daiichi-Sankyo, Bayer, Pfizer,  
14  
15 and Boehringer-Ingelheim, personal fees from Portola/Alexion, Abbvie, Pfizer/ Bristol-Meyers  
16  
17 Squibb, Norgine, Viatris, and Sanofi, all paid to her institution and outside the submitted work. **MVH**  
18  
19 reports grants from Dutch Heart Foundation, Netherlands Organisation for Health Research and  
20  
21 Development, Bayer Health Care, Pfizer-BMS Leo Pharma Boehringer-Ingelheim, all outside this  
22  
23 work. **FAK** reports grants or contracts from Bayer, BMS, BSCI, MSD, Leo Pharma, Actelion, Farm-X,  
24  
25 The Netherlands Organisation for Health Research and Development, the Dutch Thrombosis  
26  
27 Association, The Dutch Heart Foundation and the Horizon Europe Program, all unrelated to this work  
28  
29 and paid to his institution. All others report no conflicts of interest related to this project.  
30  
31  
32  
33  
34  
35  
36  
37  
38  
39  
40  
41  
42  
43  
44  
45  
46  
47  
48  
49  
50  
51  
52  
53  
54  
55  
56  
57  
58  
59  
60

1  
2  
3  
4  
5  
6  
7  
8  
9  
10  
11  
12  
13  
14  
15  
16  
17  
18  
19  
20  
21  
22  
23  
24  
25  
26  
27  
28  
29  
30  
31  
32  
33  
34  
35  
36  
37  
38  
39  
40  
41  
42  
43  
44  
45  
46  
47  
48  
49  
50  
51  
52  
53  
54  
55  
56  
57  
58  
59  
60

**FIGURES**

**Figure 1. Design of the L-TRRiP study**

For peer review only

## TABLES

Table 1. L-TRRiP model

| Factor                                                   | Coefficient                                                                                                                                                           |
|----------------------------------------------------------|-----------------------------------------------------------------------------------------------------------------------------------------------------------------------|
| Male sex                                                 | 0.63                                                                                                                                                                  |
| Type of first VTE                                        |                                                                                                                                                                       |
| PE                                                       | -0.61                                                                                                                                                                 |
| PE + DVT                                                 | 0.32                                                                                                                                                                  |
| Location of DVT                                          |                                                                                                                                                                       |
| Popliteal DVT <sup>a</sup>                               | -0.46                                                                                                                                                                 |
| Surgery <sup>b</sup>                                     | -0.51                                                                                                                                                                 |
| Pregnancy/puerperium <sup>b</sup>                        | -1.49                                                                                                                                                                 |
| Hormone use <sup>c</sup>                                 | -0.67                                                                                                                                                                 |
| Plaster cast <sup>b</sup>                                | -0.79                                                                                                                                                                 |
| Immobility in bed, in hospital <sup>b, d</sup>           | -0.31                                                                                                                                                                 |
| History of cardiovascular disease <sup>e</sup>           | -0.35                                                                                                                                                                 |
| Blood group, non-O                                       | 0.24                                                                                                                                                                  |
| Factor V Leiden mutation <sup>f</sup>                    | 0.40                                                                                                                                                                  |
| <b>Calculation of the L-TRRiP score</b>                  |                                                                                                                                                                       |
| Prognostic score                                         | Beta1*x1 + beta2*x2 + beta3*x3 + .... The x1, x2, x3, etc. represent the factors in the model, and beta1, beta2, beta3 etc. represent the corresponding coefficients. |
| Absolute 2-years risk of VTE recurrence                  | 1- 0.9235595 <sup>exp</sup> (prognostic score)                                                                                                                        |
| <b>Classification of patients with the L-TRRiP score</b> |                                                                                                                                                                       |
| Low recurrent VTE risk                                   | 2-years risk < 0.06                                                                                                                                                   |
| Intermediate recurrent VTE risk                          | 2-years risk 0.06 - 0.14                                                                                                                                              |
| High recurrent VTE risk                                  | 2-years risk > 0.14                                                                                                                                                   |

Table adapted from Timp et al.<sup>17</sup>

<sup>a</sup> Indicates DVT at the level of the vena poplitea or below. <sup>b</sup> Within three months before VTE. <sup>c</sup> Use of hormonal contraceptives or hormone replacement therapy at the time of VTE. <sup>d</sup> Confinement to bed  $\geq$  3 days. <sup>e</sup> Including a history of heart failure, angina pectoris, peripheral artery vascular disease (claudication), acute myocardial infarction. <sup>f</sup> Homozygous or heterozygous.

**Table 2. VTE-BLEED model**

| Factor                                                    | Score           |
|-----------------------------------------------------------|-----------------|
| Active cancer <sup>a</sup>                                | 2               |
| Male with uncontrolled arterial hypertension <sup>b</sup> | 1               |
| Anaemia <sup>c</sup>                                      | 1.5             |
| History of bleeding <sup>d</sup>                          | 1.5             |
| Age ≥ 60 years old                                        | 1.5             |
| Renal dysfunction <sup>e</sup>                            | 1.5             |
| Classification of patients with the VTE-BLEED score       |                 |
| Low bleeding risk                                         | Total score < 2 |
| High bleeding risk                                        | Total score ≥ 2 |

Table adapted from Klok et al.<sup>35</sup>

<sup>a</sup> Cancer diagnosed within six months before diagnosis of VTE (excluding basal-cell or squamous-cell carcinoma of the skin), recently recurrent or progressive cancer or any cancer that required anti-cancer treatment within six months before the VTE was diagnosed. <sup>b</sup> Value of systolic blood pressure ≥ 140 mmHg at baseline. <sup>c</sup> Haemoglobin < 13 g/dl in men or < 12 g/dl in women. <sup>d</sup> Including prior major or non-major clinically relevant bleeding events, rectal bleeding (more than spotting on toilet paper), frequent nose bleeding or haematuria. <sup>e</sup> Estimated glomerular filtration rate (eGFR) < 60 ml/min at baseline (calculated with Cockcroft-Gault formula).

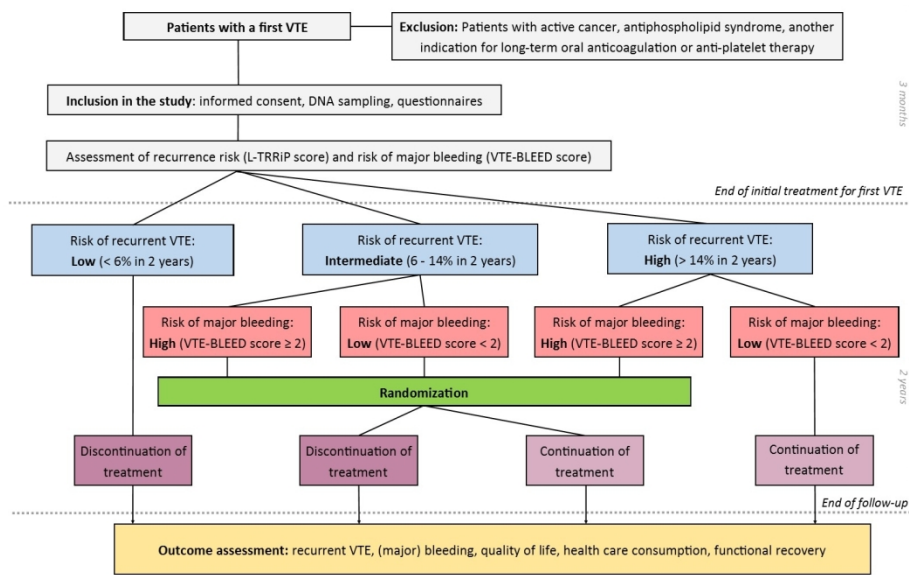

Design of the L-TRRiP study

297x209mm (150 x 150 DPI)



## Appendix I - Contributors L-TRRiP study; version August 2023

### Participating centres:

#### **Adrz, Goes**

- Yavuz Bilgin
- Marleen Goddrie
- Pieter Jobse
- Suzanne Jong
- Saskia Kuipers
- Brianne Murphy
- Carolien van Netten

#### **Amphia Ziekenhuis, Breda**

- Carla Boekholt
- Coen van Guldener
- Danick Werner

#### **Amsterdam University Medical Centers, Amsterdam**

- Michiel Coppens
- Nick van Es

#### **Diakonessenhuis, Utrecht**

- Annemiek Bogerd
- Ymke Broers
- Stan Kolman
- Marcel A van de Ree
- Sanjay Sankatsing

#### **Groene Hart Ziekenhuis, Gouda**

- Marissa Cloos - van Balen
- Ted Koster
- Lenneke van Tol

#### **Haaglanden Medisch Centrum, the Hague**

- Edith Beishuizen
- Yvonne Ende - Verhaar
- Milou Stals

#### **Haga Teaching Hospital, the Hague**

- Shantie Bharatsingh
- Edith Boersma
- Annemarie van der Kraan - Donker
- Albert T A Mairuhu
- Rick Roos

**Ikazia ziekenhuis, Rotterdam**

- Sabine van Arnhem
- Fransien Croon - de Boer
- Ad Dees
- Matthijs Eefting
- J P (Hanneke) van Embden
- Roxane Heller
- Merel Hoogendorp
- Roel Jonkhoff
- Roel J J M van de Laar
- Corry Leunis - de Ruiten
- Patricia Scherpenisse – Klopstra

**Isala, Zwolle**

- Jan-Willem K van den Berg
- Tom L H Stellema

**Leiden University Medical Centre, Leiden**

- M Elske van den Akker - van Marle
- Lizanne E van den Akker
- J Louise I Burggraaf
- Eleonora C Camilleri
- Suzanne C Cannegieter
- Menno V Huisman
- Ingeborg de Jonge
- Frederikus A Klok
- Inger N Kunnekes
- Saskia le Cessie
- Dieuwke Luijten
- Lejla Mahic
- Petra J Noordijk
- Hülya Öztürk
- Alexia M van der Ploeg
- Nienke van Rein
- Vibeke Schmidt
- Anne-Marie Schuitemaker
- Vera C Slootweg
- Mark J R Smeets
- Milou Thibaudier

**Martini Ziekenhuis, Groningen**

- Coty Y Bruggeman
- Annette W G van der Velden

**Nij Smellinghe Ziekenhuis, Drachten**

- Marco Dam

- Swopkje de Jong
- Cees Kroon
- Hanneke van der Velde

**Radboud University Medical Center, Nijmegen**

- Evertine Abbink
- Jenneke Leentjens
- Saskia Middeldorp

**Rode Kruis Ziekenhuis, Beverwijk**

- Carlinda Bresser
- Laura M Faber
- Fleur Kleijwegt
- Tjerk de Nijs
- Simone Sissing

**University Medical Center Groningen, Groningen**

- Soerajja Bhoelan
- Tessa Elling
- Èmese Heijkoop
- Francien Huisman
- Mark Lenssen
- Anja B U Makelburg
- Karina Meijer
- Karen H Thedinga
- Marja A J Voskuilen
- Femke Yspeerd

**Wilhelmina Ziekenhuis, Assen**

- Sandra Brookman
- Titia Lamberts
- Inge Paas
- Janneke Swart – Heikens

**Ziekenhuis Gelderse Vallei, Ede**

- Remy H H Bemelmans
- Janneke van den Brink
- Wouter K de Jong
- Aline van de Vendel

**Independent physician:**

Marieke J.H. Wermer, department of neurology, Leiden university Medical Center

# Reporting checklist for protocol of a clinical trial.

Based on the SPIRIT guidelines.

## Instructions to authors

Complete this checklist by entering the page numbers from your manuscript where readers will find each of the items listed below.

Your article may not currently address all the items on the checklist. Please modify your text to include the missing information. If you are certain that an item does not apply, please write "n/a" and provide a short explanation.

Upload your completed checklist as an extra file when you submit to a journal.

In your methods section, say that you used the SPIRIT reporting guidelines, and cite them as:

Chan A-W, Tetzlaff JM, Gøtzsche PC, Altman DG, Mann H, Berlin J, Dickersin K, Hróbjartsson A, Schulz KF, Parulekar WR, Krleža-Jerić K, Laupacis A, Moher D. SPIRIT 2013 Explanation and Elaboration: Guidance for protocols of clinical trials. *BMJ*. 2013;346:e7586

|                                   |                     | Reporting Item                                                                                               | Page Number                                                                     |
|-----------------------------------|---------------------|--------------------------------------------------------------------------------------------------------------|---------------------------------------------------------------------------------|
| <b>Administrative information</b> |                     |                                                                                                              |                                                                                 |
| Title                             | <a href="#">#1</a>  | Descriptive title identifying the study design, population, interventions, and, if applicable, trial acronym | 1                                                                               |
| Trial registration                | <a href="#">#2a</a> | Trial identifier and registry name. If not yet registered, name of intended registry                         | 4 and 9                                                                         |
| Trial registration: data set      | <a href="#">#2b</a> | All items from the World Health Organization Trial Registration Data Set                                     | See trial register                                                              |
| Protocol version                  | <a href="#">#3</a>  | Date and version identifier                                                                                  | n/a for manuscript, current version of MREC approved protocol is 1.5 (20-10-22) |
| Funding                           | <a href="#">#4</a>  | Sources and types of financial, material, and other support                                                  | 24                                                                              |

|    |                      |                     |                                           |                          |
|----|----------------------|---------------------|-------------------------------------------|--------------------------|
| 1  | Roles and            | <a href="#">#5a</a> | Names, affiliations, and roles of         | 1, 24                    |
| 2  | responsibilities:    |                     | protocol contributors                     |                          |
| 3  | contributorship      |                     |                                           |                          |
| 4  |                      |                     |                                           |                          |
| 5  |                      |                     |                                           |                          |
| 6  | Roles and            | <a href="#">#5b</a> | Name and contact information for the      | 2 (corresponding author) |
| 7  | responsibilities:    |                     | trial sponsor                             |                          |
| 8  | sponsor contact      |                     |                                           |                          |
| 9  | information          |                     |                                           |                          |
| 10 |                      |                     |                                           |                          |
| 11 |                      |                     |                                           |                          |
| 12 |                      |                     |                                           |                          |
| 13 | Roles and            | <a href="#">#5c</a> | Role of study sponsor and funders, if     | 24                       |
| 14 | responsibilities:    |                     | any, in study design; collection,         |                          |
| 15 | sponsor and funder   |                     | management, analysis, and                 |                          |
| 16 |                      |                     | interpretation of data; writing of the    |                          |
| 17 |                      |                     | report; and the decision to submit the    |                          |
| 18 |                      |                     | report for publication, including whether |                          |
| 19 |                      |                     | they will have ultimate authority over    |                          |
| 20 |                      |                     | any of these activities                   |                          |
| 21 |                      |                     |                                           |                          |
| 22 |                      |                     |                                           |                          |
| 23 |                      |                     |                                           |                          |
| 24 |                      |                     |                                           |                          |
| 25 |                      |                     |                                           |                          |
| 26 | Roles and            | <a href="#">#5d</a> | Composition, roles, and responsibilities  | See methods (p9-15)      |
| 27 | responsibilities:    |                     | of the coordinating centre, steering      |                          |
| 28 | committees           |                     | committee, endpoint adjudication          |                          |
| 29 |                      |                     | committee, data management team,          |                          |
| 30 |                      |                     | and other individuals or groups           |                          |
| 31 |                      |                     | overseeing the trial, if applicable (see  |                          |
| 32 |                      |                     | Item 21a for data monitoring              |                          |
| 33 |                      |                     | committee)                                |                          |
| 34 |                      |                     |                                           |                          |
| 35 |                      |                     |                                           |                          |
| 36 |                      |                     |                                           |                          |
| 37 |                      |                     |                                           |                          |
| 38 |                      |                     |                                           |                          |
| 39 | <b>Introduction</b>  |                     |                                           |                          |
| 40 |                      |                     |                                           |                          |
| 41 | Background and       | <a href="#">#6a</a> | Description of research question and      | 6-8                      |
| 42 | rationale            |                     | justification for undertaking the trial,  |                          |
| 43 |                      |                     | including summary of relevant studies     |                          |
| 44 |                      |                     | (published and unpublished) examining     |                          |
| 45 |                      |                     | benefits and harms for each               |                          |
| 46 |                      |                     | intervention                              |                          |
| 47 |                      |                     |                                           |                          |
| 48 |                      |                     |                                           |                          |
| 49 |                      |                     |                                           |                          |
| 50 |                      |                     |                                           |                          |
| 51 | Background and       | <a href="#">#6b</a> | Explanation for choice of comparators     | 6-8                      |
| 52 | rationale: choice of |                     |                                           |                          |
| 53 | comparators          |                     |                                           |                          |
| 54 |                      |                     |                                           |                          |
| 55 |                      |                     |                                           |                          |
| 56 | Objectives           | <a href="#">#7</a>  | Specific objectives or hypotheses         | 8                        |
| 57 |                      |                     |                                           |                          |
| 58 |                      |                     |                                           |                          |
| 59 |                      |                     |                                           |                          |
| 60 |                      |                     |                                           |                          |

|    |                           |                      |                                            |       |
|----|---------------------------|----------------------|--------------------------------------------|-------|
| 1  | Trial design              | <a href="#">#8</a>   | Description of trial design including      | 9     |
| 2  |                           |                      | type of trial (eg, parallel group,         |       |
| 3  |                           |                      | crossover, factorial, single group),       |       |
| 4  |                           |                      | allocation ratio, and framework (eg,       |       |
| 5  |                           |                      | superiority, equivalence, non-inferiority, |       |
| 6  |                           |                      | exploratory)                               |       |
| 7  |                           |                      |                                            |       |
| 8  |                           |                      |                                            |       |
| 9  |                           |                      |                                            |       |
| 10 |                           |                      |                                            |       |
| 11 | <b>Methods:</b>           |                      |                                            |       |
| 12 | <b>Participants,</b>      |                      |                                            |       |
| 13 | <b>interventions, and</b> |                      |                                            |       |
| 14 | <b>outcomes</b>           |                      |                                            |       |
| 15 |                           |                      |                                            |       |
| 16 |                           |                      |                                            |       |
| 17 | Study setting             | <a href="#">#9</a>   | Description of study settings (eg,         | 9     |
| 18 |                           |                      | community clinic, academic hospital)       |       |
| 19 |                           |                      | and list of countries where data will be   |       |
| 20 |                           |                      | collected. Reference to where list of      |       |
| 21 |                           |                      | study sites can be obtained                |       |
| 22 |                           |                      |                                            |       |
| 23 |                           |                      |                                            |       |
| 24 |                           |                      |                                            |       |
| 25 |                           |                      |                                            |       |
| 26 | Eligibility criteria      | <a href="#">#10</a>  | Inclusion and exclusion criteria for       | 9/10  |
| 27 |                           |                      | participants. If applicable, eligibility   |       |
| 28 |                           |                      | criteria for study centres and individuals |       |
| 29 |                           |                      | who will perform the interventions (eg,    |       |
| 30 |                           |                      | surgeons, psychotherapists)                |       |
| 31 |                           |                      |                                            |       |
| 32 |                           |                      |                                            |       |
| 33 |                           |                      |                                            |       |
| 34 | Interventions:            | <a href="#">#11a</a> | Interventions for each group with          | 10/11 |
| 35 | description               |                      | sufficient detail to allow replication,    |       |
| 36 |                           |                      | including how and when they will be        |       |
| 37 |                           |                      | administered                               |       |
| 38 |                           |                      |                                            |       |
| 39 |                           |                      |                                            |       |
| 40 |                           |                      |                                            |       |
| 41 | Interventions:            | <a href="#">#11b</a> | Criteria for discontinuing or modifying    | 10-12 |
| 42 | modifications             |                      | allocated interventions for a given trial  |       |
| 43 |                           |                      | participant (eg, drug dose change in       |       |
| 44 |                           |                      | response to harms, participant request,    |       |
| 45 |                           |                      | or improving / worsening disease)          |       |
| 46 |                           |                      |                                            |       |
| 47 |                           |                      |                                            |       |
| 48 |                           |                      |                                            |       |
| 49 | Interventions:            | <a href="#">#11c</a> | Strategies to improve adherence to         | 11,12 |
| 50 | adherence                 |                      | intervention protocols, and any            |       |
| 51 |                           |                      | procedures for monitoring adherence        |       |
| 52 |                           |                      | (eg, drug tablet return; laboratory tests) |       |
| 53 |                           |                      |                                            |       |
| 54 |                           |                      |                                            |       |
| 55 |                           |                      |                                            |       |
| 56 |                           |                      |                                            |       |
| 57 |                           |                      |                                            |       |
| 58 |                           |                      |                                            |       |
| 59 |                           |                      |                                            |       |
| 60 |                           |                      |                                            |       |

|    |                           |                      |                                          |                                |
|----|---------------------------|----------------------|------------------------------------------|--------------------------------|
| 1  | Interventions:            | <a href="#">#11d</a> | Relevant concomitant care and            | n/a, no restriction to routine |
| 2  | concomitant care          |                      | interventions that are permitted or      | care are made in the trial     |
| 3  |                           |                      | prohibited during the trial              |                                |
| 4  |                           |                      |                                          |                                |
| 5  |                           |                      |                                          |                                |
| 6  | Outcomes                  | <a href="#">#12</a>  | Primary, secondary, and other            | 12/13                          |
| 7  |                           |                      | outcomes, including the specific         |                                |
| 8  |                           |                      | measurement variable (eg, systolic       |                                |
| 9  |                           |                      | blood pressure), analysis metric (eg,    |                                |
| 10 |                           |                      | change from baseline, final value, time  |                                |
| 11 |                           |                      | to event), method of aggregation (eg,    |                                |
| 12 |                           |                      | median, proportion), and time point for  |                                |
| 13 |                           |                      | each outcome. Explanation of the         |                                |
| 14 |                           |                      | clinical relevance of chosen efficacy    |                                |
| 15 |                           |                      | and harm outcomes is strongly            |                                |
| 16 |                           |                      | recommended                              |                                |
| 17 |                           |                      |                                          |                                |
| 18 |                           |                      |                                          |                                |
| 19 |                           |                      |                                          |                                |
| 20 |                           |                      |                                          |                                |
| 21 |                           |                      |                                          |                                |
| 22 |                           |                      |                                          |                                |
| 23 | Participant timeline      | <a href="#">#13</a>  | Time schedule of enrolment,              | 10-12                          |
| 24 |                           |                      | interventions (including any run-ins and |                                |
| 25 |                           |                      | washouts), assessments, and visits for   |                                |
| 26 |                           |                      | participants. A schematic diagram is     |                                |
| 27 |                           |                      | highly recommended (see Figure)          |                                |
| 28 |                           |                      |                                          |                                |
| 29 |                           |                      |                                          |                                |
| 30 |                           |                      |                                          |                                |
| 31 |                           |                      |                                          |                                |
| 32 | Sample size               | <a href="#">#14</a>  | Estimated number of participants         | 14                             |
| 33 |                           |                      | needed to achieve study objectives and   |                                |
| 34 |                           |                      | how it was determined, including         |                                |
| 35 |                           |                      | clinical and statistical assumptions     |                                |
| 36 |                           |                      | supporting any sample size               |                                |
| 37 |                           |                      | calculations                             |                                |
| 38 |                           |                      |                                          |                                |
| 39 |                           |                      |                                          |                                |
| 40 |                           |                      |                                          |                                |
| 41 |                           |                      |                                          |                                |
| 42 | Recruitment               | <a href="#">#15</a>  | Strategies for achieving adequate        | 9                              |
| 43 |                           |                      | participant enrolment to reach target    |                                |
| 44 |                           |                      | sample size                              |                                |
| 45 |                           |                      |                                          |                                |
| 46 |                           |                      |                                          |                                |
| 47 | <b>Methods:</b>           |                      |                                          |                                |
| 48 | <b>Assignment of</b>      |                      |                                          |                                |
| 49 | <b>interventions (for</b> |                      |                                          |                                |
| 50 | <b>controlled trials)</b> |                      |                                          |                                |
| 51 |                           |                      |                                          |                                |
| 52 |                           |                      |                                          |                                |
| 53 |                           |                      |                                          |                                |
| 54 | Allocation:               | <a href="#">#16a</a> | Method of generating the allocation      | 11                             |
| 55 | sequence                  |                      | sequence (eg, computer-generated         |                                |
| 56 | generation                |                      | random numbers), and list of any         |                                |
| 57 |                           |                      | factors for stratification. To reduce    |                                |
| 58 |                           |                      |                                          |                                |
| 59 |                           |                      |                                          |                                |
| 60 |                           |                      |                                          |                                |

1 predictability of a random sequence,  
 2 details of any planned restriction (eg,  
 3 blocking) should be provided in a  
 4 separate document that is unavailable  
 5 to those who enrol participants or  
 6 assign interventions  
 7  
 8  
 9

|                           |                      |                                               |                             |
|---------------------------|----------------------|-----------------------------------------------|-----------------------------|
| 10 Allocation             | <a href="#">#16b</a> | Mechanism of implementing the                 | 11                          |
| 11 concealment            |                      | allocation sequence (eg, central              |                             |
| 12 mechanism              |                      | telephone; sequentially numbered,             |                             |
| 13                        |                      | opaque, sealed envelopes), describing         |                             |
| 14                        |                      | any steps to conceal the sequence until       |                             |
| 15                        |                      | interventions are assigned                    |                             |
| 16                        |                      |                                               |                             |
| 17                        |                      |                                               |                             |
| 18                        |                      |                                               |                             |
| 19                        |                      |                                               |                             |
| 20 Allocation:            | <a href="#">#16c</a> | Who will generate the allocation              | 11                          |
| 21 implementation         |                      | sequence, who will enrol participants,        |                             |
| 22                        |                      | and who will assign participants to           |                             |
| 23                        |                      | interventions                                 |                             |
| 24                        |                      |                                               |                             |
| 25                        |                      |                                               |                             |
| 26                        |                      |                                               |                             |
| 27 Blinding (masking)     | <a href="#">#17a</a> | Who will be blinded after assignment to       | 13 (only outcome            |
| 28                        |                      | interventions (eg, trial participants, care   | adjudication committee is   |
| 29                        |                      | providers, outcome assessors, data            | blinded)                    |
| 30                        |                      | analysts), and how                            |                             |
| 31                        |                      |                                               |                             |
| 32                        |                      |                                               |                             |
| 33                        |                      |                                               |                             |
| 34 Blinding (masking):    | <a href="#">#17b</a> | If blinded, circumstances under which         | n/a, since patient and      |
| 35 emergency              |                      | unblinding is permissible, and                | treating physicians are not |
| 36 unblinding             |                      | procedure for revealing a participant's       | blinded                     |
| 37                        |                      | allocated intervention during the trial       |                             |
| 38                        |                      |                                               |                             |
| 39                        |                      |                                               |                             |
| 40 <b>Methods: Data</b>   |                      |                                               |                             |
| 41 <b>collection,</b>     |                      |                                               |                             |
| 42 <b>management, and</b> |                      |                                               |                             |
| 43 <b>analysis</b>        |                      |                                               |                             |
| 44                        |                      |                                               |                             |
| 45                        |                      |                                               |                             |
| 46                        |                      |                                               |                             |
| 47 Data collection        | <a href="#">#18a</a> | Plans for assessment and collection of        | 13                          |
| 48 plan                   |                      | outcome, baseline, and other trial data,      |                             |
| 49                        |                      | including any related processes to            |                             |
| 50                        |                      | promote data quality (eg, duplicate           |                             |
| 51                        |                      | measurements, training of assessors)          |                             |
| 52                        |                      | and a description of study instruments        |                             |
| 53                        |                      | (eg, questionnaires, laboratory tests)        |                             |
| 54                        |                      | along with their reliability and validity, if |                             |
| 55                        |                      |                                               |                             |
| 56                        |                      |                                               |                             |
| 57                        |                      |                                               |                             |
| 58                        |                      |                                               |                             |
| 59                        |                      |                                               |                             |
| 60                        |                      |                                               |                             |



known. Reference to where data collection forms can be found, if not in the protocol

|    |                      |                      |                                                                    |
|----|----------------------|----------------------|--------------------------------------------------------------------|
| 1  |                      |                      |                                                                    |
| 2  |                      |                      |                                                                    |
| 3  |                      |                      |                                                                    |
| 4  |                      |                      |                                                                    |
| 5  | Data collection      | <a href="#">#18b</a> | Plans to promote participant retention 13/19                       |
| 6  | plan: retention      |                      | and complete follow-up, including list of                          |
| 7  |                      |                      | any outcome data to be collected for                               |
| 8  |                      |                      | participants who discontinue or deviate                            |
| 9  |                      |                      | from intervention protocols                                        |
| 10 |                      |                      |                                                                    |
| 11 |                      |                      |                                                                    |
| 12 |                      |                      |                                                                    |
| 13 | Data management      | <a href="#">#19</a>  | Plans for data entry, coding, security, 13                         |
| 14 |                      |                      | and storage, including any related                                 |
| 15 |                      |                      | processes to promote data quality (eg,                             |
| 16 |                      |                      | double data entry; range checks for                                |
| 17 |                      |                      | data values). Reference to where                                   |
| 18 |                      |                      | details of data management                                         |
| 19 |                      |                      | procedures can be found, if not in the                             |
| 20 |                      |                      | protocol                                                           |
| 21 |                      |                      |                                                                    |
| 22 |                      |                      |                                                                    |
| 23 |                      |                      |                                                                    |
| 24 |                      |                      |                                                                    |
| 25 |                      |                      |                                                                    |
| 26 | Statistics:          | <a href="#">#20a</a> | Statistical methods for analysing 14-16                            |
| 27 | outcomes             |                      | primary and secondary outcomes.                                    |
| 28 |                      |                      | Reference to where other details of the                            |
| 29 |                      |                      | statistical analysis plan can be found, if                         |
| 30 |                      |                      | not in the protocol                                                |
| 31 |                      |                      |                                                                    |
| 32 |                      |                      |                                                                    |
| 33 |                      |                      |                                                                    |
| 34 |                      |                      |                                                                    |
| 35 | Statistics:          | <a href="#">#20b</a> | Methods for any additional analyses 14-16                          |
| 36 | additional analyses  |                      | (eg, subgroup and adjusted analyses)                               |
| 37 |                      |                      |                                                                    |
| 38 |                      |                      |                                                                    |
| 39 | Statistics: analysis | <a href="#">#20c</a> | Definition of analysis population 14-16                            |
| 40 | population and       |                      | relating to protocol non-adherence (eg,                            |
| 41 | missing data         |                      | as randomised analysis), and any                                   |
| 42 |                      |                      | statistical methods to handle missing                              |
| 43 |                      |                      | data (eg, multiple imputation)                                     |
| 44 |                      |                      |                                                                    |
| 45 |                      |                      |                                                                    |
| 46 |                      |                      |                                                                    |
| 47 | <b>Methods:</b>      |                      |                                                                    |
| 48 | <b>Monitoring</b>    |                      |                                                                    |
| 49 |                      |                      |                                                                    |
| 50 |                      |                      |                                                                    |
| 51 | Data monitoring:     | <a href="#">#21a</a> | Composition of data monitoring 17, monitoring of trial             |
| 52 | formal committee     |                      | committee (DMC); summary of its role execution is monitored by     |
| 53 |                      |                      | and reporting structure; statement of monitors from the LUMC;      |
| 54 |                      |                      | whether it is independent from the since this is a neglectable     |
| 55 |                      |                      | sponsor and competing interests; and risk study no data safety     |
| 56 |                      |                      | reference to where further details about monitoring board has been |
| 57 |                      |                      |                                                                    |
| 58 |                      |                      |                                                                    |
| 59 |                      |                      |                                                                    |
| 60 |                      |                      |                                                                    |

|    |                      |                                                                                                            |                                             |
|----|----------------------|------------------------------------------------------------------------------------------------------------|---------------------------------------------|
|    |                      | its charter can be found, if not in the protocol. Alternatively, an explanation of why a DMC is not needed | installed (according to Dutch legislation). |
| 1  |                      |                                                                                                            |                                             |
| 2  |                      |                                                                                                            |                                             |
| 3  |                      |                                                                                                            |                                             |
| 4  |                      |                                                                                                            |                                             |
| 5  |                      |                                                                                                            |                                             |
| 6  | Data monitoring:     | <a href="#">#21b</a> Description of any interim analyses and                                               | n/a, since this is a                        |
| 7  | interim analysis     | stopping guidelines, including who will                                                                    | neglectable risk study no                   |
| 8  |                      | have access to these interim results                                                                       | data safety monitoring board                |
| 9  |                      | and make the final decision to                                                                             | has been installed                          |
| 10 |                      | terminate the trial                                                                                        | (according to Dutch                         |
| 11 |                      |                                                                                                            | legislation).                               |
| 12 |                      |                                                                                                            |                                             |
| 13 |                      |                                                                                                            |                                             |
| 14 |                      |                                                                                                            |                                             |
| 15 | Harms                | <a href="#">#22</a> Plans for collecting, assessing,                                                       | 12                                          |
| 16 |                      | reporting, and managing solicited and                                                                      |                                             |
| 17 |                      | spontaneously reported adverse events                                                                      |                                             |
| 18 |                      | and other unintended effects of trial                                                                      |                                             |
| 19 |                      | interventions or trial conduct                                                                             |                                             |
| 20 |                      |                                                                                                            |                                             |
| 21 |                      |                                                                                                            |                                             |
| 22 |                      |                                                                                                            |                                             |
| 23 | Auditing             | <a href="#">#23</a> Frequency and procedures for auditing                                                  | n.a. no preplanned audits                   |
| 24 |                      | trial conduct, if any, and whether the                                                                     |                                             |
| 25 |                      | process will be independent from                                                                           |                                             |
| 26 |                      | investigators and the sponsor                                                                              |                                             |
| 27 |                      |                                                                                                            |                                             |
| 28 |                      |                                                                                                            |                                             |
| 29 |                      |                                                                                                            |                                             |
| 30 | <b>Ethics and</b>    |                                                                                                            |                                             |
| 31 | <b>dissemination</b> |                                                                                                            |                                             |
| 32 |                      |                                                                                                            |                                             |
| 33 |                      |                                                                                                            |                                             |
| 34 | Research ethics      | <a href="#">#24</a> Plans for seeking research ethics                                                      | 15                                          |
| 35 | approval             | committee / institutional review board                                                                     |                                             |
| 36 |                      | (REC / IRB) approval                                                                                       |                                             |
| 37 |                      |                                                                                                            |                                             |
| 38 |                      |                                                                                                            |                                             |
| 39 | Protocol             | <a href="#">#25</a> Plans for communicating important                                                      | 16 all relevant protocol                    |
| 40 | amendments           | protocol modifications (eg, changes to                                                                     | amendments will be                          |
| 41 |                      | eligibility criteria, outcomes, analyses)                                                                  | reviewed by the MREC                        |
| 42 |                      | to relevant parties (eg, investigators,                                                                    |                                             |
| 43 |                      | REC / IRBs, trial participants, trial                                                                      |                                             |
| 44 |                      | registries, journals, regulators)                                                                          |                                             |
| 45 |                      |                                                                                                            |                                             |
| 46 |                      |                                                                                                            |                                             |
| 47 |                      |                                                                                                            |                                             |
| 48 |                      |                                                                                                            |                                             |
| 49 | Consent or assent    | <a href="#">#26a</a> Who will obtain informed consent or                                                   | 10                                          |
| 50 |                      | assent from potential trial participants                                                                   |                                             |
| 51 |                      | or authorised surrogates, and how (see                                                                     |                                             |
| 52 |                      | Item 32)                                                                                                   |                                             |
| 53 |                      |                                                                                                            |                                             |
| 54 |                      |                                                                                                            |                                             |
| 55 |                      |                                                                                                            |                                             |
| 56 | Consent or assent:   | <a href="#">#26b</a> Additional consent provisions for                                                     | Included in patient                         |
| 57 | ancillary studies    | collection and use of participant data                                                                     | information file                            |
| 58 |                      |                                                                                                            |                                             |
| 59 |                      |                                                                                                            |                                             |
| 60 |                      |                                                                                                            |                                             |

and biological specimens in ancillary studies, if applicable

|    |                       |                      |                                                                   |
|----|-----------------------|----------------------|-------------------------------------------------------------------|
| 1  |                       |                      |                                                                   |
| 2  |                       |                      |                                                                   |
| 3  |                       |                      |                                                                   |
| 4  | Confidentiality       | <a href="#">#27</a>  | How personal information about 13                                 |
| 5  |                       |                      | potential and enrolled participants will                          |
| 6  |                       |                      | be collected, shared, and maintained in                           |
| 7  |                       |                      | order to protect confidentiality before,                          |
| 8  |                       |                      | during, and after the trial                                       |
| 9  |                       |                      |                                                                   |
| 10 |                       |                      |                                                                   |
| 11 |                       |                      |                                                                   |
| 12 | Declaration of        | <a href="#">#28</a>  | Financial and other competing interests 24/25                     |
| 13 | interests             |                      | for principal investigators for the overall                       |
| 14 |                       |                      | trial and each study site                                         |
| 15 |                       |                      |                                                                   |
| 16 |                       |                      |                                                                   |
| 17 | Data access           | <a href="#">#29</a>  | Statement of who will have access to 17                           |
| 18 |                       |                      | the final trial dataset, and disclosure of                        |
| 19 |                       |                      | contractual agreements that limit such                            |
| 20 |                       |                      | access for investigators                                          |
| 21 |                       |                      |                                                                   |
| 22 |                       |                      |                                                                   |
| 23 |                       |                      |                                                                   |
| 24 | Ancillary and post    | <a href="#">#30</a>  | Provisions, if any, for ancillary and According to Dutch laws a   |
| 25 | trial care            |                      | post-trial care, and for compensation to participant insurance is |
| 26 |                       |                      | those who suffer harm from trial available; information on        |
| 27 |                       |                      | participation compensation for injury is                          |
| 28 |                       |                      | included in the patient                                           |
| 29 |                       |                      | information letter (in Dutch)                                     |
| 30 |                       |                      | and available upon request                                        |
| 31 |                       |                      |                                                                   |
| 32 |                       |                      |                                                                   |
| 33 |                       |                      |                                                                   |
| 34 |                       |                      |                                                                   |
| 35 | Dissemination         | <a href="#">#31a</a> | Plans for investigators and sponsor to 17                         |
| 36 | policy: trial results |                      | communicate trial results to                                      |
| 37 |                       |                      | participants, healthcare professionals,                           |
| 38 |                       |                      | the public, and other relevant groups                             |
| 39 |                       |                      | (eg, via publication, reporting in results                        |
| 40 |                       |                      | databases, or other data sharing                                  |
| 41 |                       |                      | arrangements), including any                                      |
| 42 |                       |                      | publication restrictions                                          |
| 43 |                       |                      |                                                                   |
| 44 |                       |                      |                                                                   |
| 45 |                       |                      |                                                                   |
| 46 |                       |                      |                                                                   |
| 47 |                       |                      |                                                                   |
| 48 | Dissemination         | <a href="#">#31b</a> | Authorship eligibility guidelines and any 17                      |
| 49 | policy: authorship    |                      | intended use of professional writers                              |
| 50 |                       |                      |                                                                   |
| 51 |                       |                      |                                                                   |
| 52 | Dissemination         | <a href="#">#31c</a> | Plans, if any, for granting public access 17                      |
| 53 | policy: reproducible  |                      | to the full protocol, participant-level                           |
| 54 | research              |                      | dataset, and statistical code                                     |
| 55 |                       |                      |                                                                   |
| 56 |                       |                      |                                                                   |
| 57 |                       |                      |                                                                   |
| 58 | <b>Appendices</b>     |                      |                                                                   |
| 59 |                       |                      |                                                                   |
| 60 |                       |                      |                                                                   |

|    |                  |                     |                                       |                             |
|----|------------------|---------------------|---------------------------------------|-----------------------------|
| 1  | Informed consent | <a href="#">#32</a> | Model consent form and other related  | Available upon request      |
| 2  | materials        |                     | documentation given to participants   | (Dutch only)                |
| 3  |                  |                     | and authorised surrogates             |                             |
| 4  |                  |                     |                                       |                             |
| 5  |                  |                     |                                       |                             |
| 6  | Biological       | <a href="#">#33</a> | Plans for collection, laboratory      | 10, detailed information is |
| 7  | specimens        |                     | evaluation, and storage of biological | available upon request      |
| 8  |                  |                     | specimens for genetic or molecular    |                             |
| 9  |                  |                     | analysis in the current trial and for |                             |
| 10 |                  |                     | future use in ancillary studies, if   |                             |
| 11 |                  |                     | applicable                            |                             |
| 12 |                  |                     |                                       |                             |
| 13 |                  |                     |                                       |                             |
| 14 |                  |                     |                                       |                             |
| 15 |                  |                     |                                       |                             |

16 None The SPIRIT Explanation and Elaboration paper is distributed under the terms of the Creative  
17 Commons Attribution License CC-BY-NC. This checklist can be completed online using  
18 <https://www.goodreports.org/>, a tool made by the [EQUATOR Network](#) in collaboration with  
19 [Penelope.ai](#)  
20  
21  
22  
23  
24  
25  
26  
27  
28  
29  
30  
31  
32  
33  
34  
35  
36  
37  
38  
39  
40  
41  
42  
43  
44  
45  
46  
47  
48  
49  
50  
51  
52  
53  
54  
55  
56  
57  
58  
59  
60

# BMJ Open

## Tailored anticoagulant treatment after a first venous thromboembolism: Protocol of the Leiden Thrombosis Recurrence Risk Prevention (L-TRRiP) study, a cohort-based randomised controlled trial

|                               |                                                                                                                                                                                                                                                                                                                                                                                                                                                                                                                                                                                                                                                                                                                                                                                                                                                                                                                                                                                                                                                                                                                                                                                                                                                                                                                                                                                                                                                                                                                                                                                                                                                                                                                                                                                                                                                                                                                                                                                                                                                                                                                                                   |
|-------------------------------|---------------------------------------------------------------------------------------------------------------------------------------------------------------------------------------------------------------------------------------------------------------------------------------------------------------------------------------------------------------------------------------------------------------------------------------------------------------------------------------------------------------------------------------------------------------------------------------------------------------------------------------------------------------------------------------------------------------------------------------------------------------------------------------------------------------------------------------------------------------------------------------------------------------------------------------------------------------------------------------------------------------------------------------------------------------------------------------------------------------------------------------------------------------------------------------------------------------------------------------------------------------------------------------------------------------------------------------------------------------------------------------------------------------------------------------------------------------------------------------------------------------------------------------------------------------------------------------------------------------------------------------------------------------------------------------------------------------------------------------------------------------------------------------------------------------------------------------------------------------------------------------------------------------------------------------------------------------------------------------------------------------------------------------------------------------------------------------------------------------------------------------------------|
| Journal:                      | <i>BMJ Open</i>                                                                                                                                                                                                                                                                                                                                                                                                                                                                                                                                                                                                                                                                                                                                                                                                                                                                                                                                                                                                                                                                                                                                                                                                                                                                                                                                                                                                                                                                                                                                                                                                                                                                                                                                                                                                                                                                                                                                                                                                                                                                                                                                   |
| Manuscript ID                 | bmjopen-2023-078676.R1                                                                                                                                                                                                                                                                                                                                                                                                                                                                                                                                                                                                                                                                                                                                                                                                                                                                                                                                                                                                                                                                                                                                                                                                                                                                                                                                                                                                                                                                                                                                                                                                                                                                                                                                                                                                                                                                                                                                                                                                                                                                                                                            |
| Article Type:                 | Protocol                                                                                                                                                                                                                                                                                                                                                                                                                                                                                                                                                                                                                                                                                                                                                                                                                                                                                                                                                                                                                                                                                                                                                                                                                                                                                                                                                                                                                                                                                                                                                                                                                                                                                                                                                                                                                                                                                                                                                                                                                                                                                                                                          |
| Date Submitted by the Author: | 22-Dec-2023                                                                                                                                                                                                                                                                                                                                                                                                                                                                                                                                                                                                                                                                                                                                                                                                                                                                                                                                                                                                                                                                                                                                                                                                                                                                                                                                                                                                                                                                                                                                                                                                                                                                                                                                                                                                                                                                                                                                                                                                                                                                                                                                       |
| Complete List of Authors:     | <p>Burggraaf - van Delft, Louise; Leiden University Medical Center, Clinical Epidemiology<br/> van Rein, Nienke; Leiden University Medical Center, Clinical Epidemiology; Leiden University Medical Center, Department of Clinical Pharmacy and Toxicology<br/> Bemelmans, Remy; Ziekenhuis Gelderse Vallei, Department of Internal Medicine<br/> van den Berg, Jan-Willem; Isala Klinieken, Department of Pulmonology<br/> Bruggeman, Coty; Martini Ziekenhuis, Department of Internal Medicine<br/> Cloos - van Balen, Marissa; Groene Hart Ziekenhuis, Department of Internal Medicine<br/> Coppens, Michiel; Amsterdam UMC Location AMC, Department of Vascular Medicine; Amsterdam Cardiovascular Sciences, Pulmonary Hypertension &amp; Thrombosis<br/> Eefting, Matthijs; Ikazia Ziekenhuis, Department of Internal Medicine<br/> Ende - Verhaar, Yvonne; Medisch Centrum Haaglanden, Department of Internal Medicine<br/> van Es, Nick; Amsterdam UMC Location AMC, Department of Vascular Medicine; Amsterdam Cardiovascular Sciences, Pulmonary Hypertension &amp; Thrombosis<br/> van Guldener, Coen; Amphia Ziekenhuis, Department of Internal Medicine<br/> de Jong, Wouter; Ziekenhuis Gelderse Vallei, Department of Pulmonology<br/> Kleijwegt, Fleur; Rode Kruis Ziekenhuis, Department of Internal Medicine<br/> Koster, Ted; Groene Hart Ziekenhuis, Department of Internal Medicine<br/> Kroon, Cees; Ziekenhuis Nij Smellinghe, Department of Internal Medicine<br/> Kuipers, Saskia; ADRZ, Department of Internal Medicine<br/> Leentjens, Jenneke; Radboud Universiteit Nijmegen, Department of Internal Medicine<br/> Luijten, Dieuwke; Leiden University Medical Center, Department of Medicine - thrombosis and Hemostasis<br/> Mairuhu, Albert; Haga Hospital, Department of Internal Medicine<br/> Meijer, Karina; University of Groningen, Department of Haematology<br/> van de Ree, Marcel; Diaconessenhuis Utrecht Zeist Doorn, Department of Internal Medicine<br/> Roos, Rick; HagaZiekenhuis, Internal Medicine; Leiden University Medical Center, Health Campus The Hague/Department of Public Health and</p> |

|                                 |                                                                                                                                                                                                                                                                                                                                                                                                                                                                                                                                                                                                                                                                                                                                                                                                                                                                                                                                                                                                                                                                                                                                                                                                   |
|---------------------------------|---------------------------------------------------------------------------------------------------------------------------------------------------------------------------------------------------------------------------------------------------------------------------------------------------------------------------------------------------------------------------------------------------------------------------------------------------------------------------------------------------------------------------------------------------------------------------------------------------------------------------------------------------------------------------------------------------------------------------------------------------------------------------------------------------------------------------------------------------------------------------------------------------------------------------------------------------------------------------------------------------------------------------------------------------------------------------------------------------------------------------------------------------------------------------------------------------|
|                                 | <p>Primary Care<br/> Schrover, Ilse; Medisch Centrum Leeuwarden, Department of Internal Medicine<br/> Swart, Janneke; Wilhelmina Ziekenhuis Assen WZA, Department of Internal Medicine<br/> van der Velden, Annette; Martini Hospital, Department of Internal Medicine<br/> van den Akker-van Marle, Elske; Leiden University Medical Center, Biomedical Data Sciences<br/> le Cessie, S; Leids Universitair Medisch Centrum, Department of Clinical Epidemiology; Leiden University Medical Center, Department of Biomedical Data Sciences<br/> Geersing, Geert-Jan; Julius Center for Health Sciences and Primary Care, Department of General Practice and Nursing Science<br/> Middeldorp, Saskia; Radboudumc, Department of Internal Medicine<br/> Huisman, Menno; Leiden University Medical Center, Department of Thrombosis and Hemostasis<br/> Klok, Frederikus; Leiden University Medical Center, Department of Thrombosis and Hemostasis<br/> Cannegieter, Suzanne; Leiden University Medical Center, Department of Thrombosis and Hemostasis; Leiden University Medical Center, Department of Clinical Epidemiology<br/> L-TRRiP investigators, .; Leiden University Medical Center</p> |
| <b>Primary Subject Heading</b>: | Cardiovascular medicine                                                                                                                                                                                                                                                                                                                                                                                                                                                                                                                                                                                                                                                                                                                                                                                                                                                                                                                                                                                                                                                                                                                                                                           |
| Secondary Subject Heading:      | Epidemiology, Emergency medicine, Haematology (incl blood transfusion)                                                                                                                                                                                                                                                                                                                                                                                                                                                                                                                                                                                                                                                                                                                                                                                                                                                                                                                                                                                                                                                                                                                            |
| Keywords:                       | Thromboembolism < CARDIOLOGY, Clinical trials < THERAPEUTICS, EPIDEMIOLOGIC STUDIES, Anticoagulation < HAEMATOLOGY                                                                                                                                                                                                                                                                                                                                                                                                                                                                                                                                                                                                                                                                                                                                                                                                                                                                                                                                                                                                                                                                                |
|                                 |                                                                                                                                                                                                                                                                                                                                                                                                                                                                                                                                                                                                                                                                                                                                                                                                                                                                                                                                                                                                                                                                                                                                                                                                   |

SCHOLARONE™  
Manuscripts

**Title**

Tailored anticoagulant treatment after a first venous thromboembolism: Protocol of the Leiden Thrombosis Recurrence Risk Prevention (L-TRRiP) study, a cohort-based randomised controlled trial

**Authors**

J.L.I. Burggraaf – van Delft<sup>1</sup>, N. van Rein<sup>1,2</sup>, Remy H H Bemelmans<sup>3</sup>, Jan-Willem K van den Berg<sup>4</sup>, Coty Y Bruggeman<sup>5</sup>, Marissa Cloos - van Balen<sup>6</sup>, Michiel Coppens<sup>7,8</sup>, Matthijs Eefting<sup>9</sup>, Yvonne Ende – Verhaar<sup>10</sup>, Nick van Es<sup>7,8</sup>, Coen van Guldener<sup>11</sup>, Wouter K de Jong<sup>12</sup>, Fleur Kleijwegt<sup>13</sup>, Ted Koster<sup>6</sup>, Cees Kroon<sup>14</sup>, Saskia Kuipers<sup>15</sup>, Jenneke Leentjens<sup>16</sup>, Dieuwke Luijten<sup>17</sup>, Albert T A Mairuhu<sup>18</sup>, Karina Meijer<sup>19</sup>, Marcel A van de Ree<sup>20</sup>, Rick Roos<sup>18</sup>, Ilse Schrover<sup>21</sup>, Janneke Swart - Heikens<sup>22</sup>, Annette W G van der Velden<sup>5</sup>, M.E. van den Akker-van Marle<sup>23</sup>, S. le Cessie<sup>1,23</sup>, G.J. Geersing<sup>24</sup>, S. Middeldorp<sup>16</sup>, M.V. Huisman<sup>17</sup>, F.A. Klok<sup>17</sup>, S.C. Cannegieter<sup>1,17</sup>, on behalf of the L-TRRiP Investigators.

**Author affiliations:**

1. Department of Clinical Epidemiology, Leiden University Medical Center, Leiden, the Netherlands
2. Department of Clinical Pharmacy and Toxicology, Leiden University Medical Center, Leiden, the Netherlands
3. Department of Internal Medicine, Ziekenhuis Gelderse Vallei, Ede, the Netherlands
4. Department of Pulmonology, Isala Hospital, Zwolle, the Netherlands
5. Department of Internal Medicine, Martini Ziekenhuis, Groningen, the Netherlands
6. Department of Internal Medicine, Groene Hart Ziekenhuis, Gouda, the Netherlands
7. Department of Vascular Medicine, Amsterdam UMC location, University of Amsterdam, Amsterdam, the Netherlands
8. Amsterdam Cardiovascular Sciences, Pulmonary Hypertension & Thrombosis, Amsterdam, the Netherlands
9. Department of Internal Medicine, Ikazia Ziekenhuis, Rotterdam, the Netherlands
10. Department of Internal Medicine, Haaglanden Medisch Centrum, the Hague, the Netherlands
11. Department of Internal Medicine, Amphia Ziekenhuis, Breda, the Netherlands
12. Department of Pulmonology, Ziekenhuis Gelderse Vallei, Ede, the Netherlands
13. Department of Internal Medicine, Rode Kruis Ziekenhuis, Beverwijk, the Netherlands
14. Department of Internal Medicine, Nij Smellinghe Ziekenhuis, Drachten, the Netherlands
15. Department of Internal Medicine, Adrz, Goes, the Netherlands
16. Department of Internal Medicine, Radboud university medical center, Nijmegen, the Netherlands
17. Department of Medicine – Thrombosis and Hemostasis, Leiden University Medical Center, Leiden, The Netherlands
18. Department of Internal Medicine, Haga Teaching Hospital, the Hague, the Netherlands
19. Department of Hematology, University Medical Center Groningen, Groningen, the Netherlands
20. Department of Internal Medicine, Diaconessen Hospital, Utrecht, the Netherlands

- 1  
2  
3 21. Department of Internal Medicine, Medisch Centrum Leeuwarden, Leeuwarden, the  
4 Netherlands  
5 22. Department of Internal Medicine, Wilhelmina Ziekenhuis, Assen, the Netherlands  
6 23. Department of Biomedical Data Sciences, Leiden University Medical Center, Leiden, The  
7 Netherlands  
8 24. Julius Center for Health Sciences and Primary Care, Department of General Practice and  
9 Nursing Science, University Medical Center Utrecht, Utrecht University, Utrecht, The  
10 Netherlands  
11  
12  
13  
14  
15

16 Abstract word count: 300  
17

18 Total Word count: 4018 (excl. title page, abstract, tables, acknowledgements, contributions and  
19 references)  
20  
21  
22

23  
24  
25  
26  
27 **Corresponding author:**  
28

29 S.C. Cannegieter  
30

31 Department of Clinical Epidemiology, C7-P  
32

33 Leiden University Medical Center  
34

35 PO Box 9600  
36

37 2300 RC Leiden  
38

39 The Netherlands  
40

41 Tel: +31 715261508  
42

43 E-mail: S.C.Cannegieter@lumc.nl  
44  
45  
46  
47  
48  
49  
50  
51  
52  
53  
54  
55  
56  
57  
58  
59  
60



## ABSTRACT

### Introduction

Patients with a first venous thromboembolism (VTE) are at risk of recurrence. Recurrent VTE (rVTE) can be prevented by extended anticoagulant therapy, but this comes at the cost of an increased risk of bleeding. It is still uncertain whether patients with an intermediate recurrence risk or with a high recurrence and high bleeding risk will benefit from extended anticoagulant treatment, and whether a strategy where anticoagulant duration is tailored on the predicted risks of rVTE and bleeding can improve outcomes. The aim of the Leiden Thrombosis Recurrence Risk Prevention (L-TRRiP) study is to evaluate the outcomes of tailored duration of long-term anticoagulant treatment based on individualised assessment of rVTE and major bleeding risks.

### Methods and analysis

The L-TRRiP study is a multicentre, open-label, cohort-based, randomised controlled trial, including patients with a first VTE. We classify the risk of rVTE and major bleeding using the L-TRRiP and VTE-BLEED scores, respectively. After three months of anticoagulant therapy, patients with a low rVTE risk will discontinue anticoagulant treatment, patients with a high rVTE and low bleeding risk will continue anticoagulant treatment, whereas all other patients will be randomised to continue or discontinue anticoagulant treatment. All patients will be followed for at least two years. Inclusion will continue until the randomised group consists of 608 patients; we estimate to include 1600 patients in total. The primary outcome is the combined incidence of rVTE and major bleeding in the randomised group after two years of follow-up. Secondary outcomes include the incidence of rVTE and major bleeding, functional outcomes, quality of life and cost-effectiveness in all patients.

### Ethics and dissemination

1  
2  
3                   The protocol was approved by the Medical Research Ethics Committee Leiden – Den Haag –  
4  
5 Delft. Results are expected in 2028 and will be disseminated through peer-reviewed journals and  
6  
7 during (inter)national conferences.  
8  
9

10 **Trial registration number**

11  
12  
13                   NL9003, NCT06087952  
14  
15  
16  
17  
18  
19  
20  
21  
22  
23  
24  
25  
26  
27  
28  
29  
30  
31  
32  
33  
34  
35  
36  
37  
38  
39  
40  
41  
42  
43  
44  
45  
46  
47  
48  
49  
50  
51  
52  
53  
54  
55  
56  
57  
58  
59  
60

For peer review only

### Strengths and limitations of this study

> The models can be applied to all patients with a first VTE without cancer, irrespective of whether this event was provoked or unprovoked.

> The study is designed to follow usual clinical procedures as much as possible to increase the generalisability of the results.

> Primary outcomes will be adjudicated by a committee blinded for treatment.

> The open-label design might increase cross-over between treatment groups and might influence assessment and reporting of study outcomes by the patient or treating physician.

> Questionnaires are used for follow-up which might result in missing outcome data, despite procedures to limit this, such as regular phone contact and collecting information from treating physicians.

## INTRODUCTION

Patients with a first venous thromboembolism (VTE) are at risk of a recurrent event, especially when the first event was unprovoked. The estimated risk of recurrence in patients with a first unprovoked VTE was 10% in the first year and 36% after ten years,(1) whereas patients with a first VTE provoked by a transient risk factor have an estimated risk of 1-6% in the first year and 3-15% after five years, depending on whether the provoking factor was a minor or major transient risk factor.(2,3) A recurrent VTE has serious consequences with estimated case fatality rates of 4%.(1,4) In addition, compared with the initial event, recurrent VTE is associated with a higher risk of long-term complications such as post-thrombotic syndrome and chronic thromboembolic pulmonary hypertension.(5,6) Recurrent VTE can be prevented by prolonged oral anticoagulant therapy, but this comes at the cost of an increased risk of major bleeding compared with ceasing treatment.(7,8) A recent meta-analysis reported an overall major bleeding incidence of 1.7 per 100 person-years during extended use of vitamin K antagonists (VKAs) and 1.1 per 100 person-years during extended use of direct oral anticoagulants (DOACs), with a case fatality rate of 8.4%.(9) Importantly, the same meta-analysis reported limited safety information on long-term anticoagulation in VTE patients, in particular for DOAC recipients where information beyond one year of treatment was sparse. Indeed, indefinite use of anticoagulant therapy may result in a significant lifetime risk of major bleeding, a risk that is still to be quantified.

Consequently, the optimal duration of anticoagulant treatment is still under debate. Previously, patients received oral anticoagulant treatment for a fixed period (i.e., 3-6 months) after a first VTE, whereas current guidelines recommend to base treatment duration, (i.e. either a limited period or indefinite duration), on the balance between the risk of recurrent VTE and major bleeding.(10-15) Indefinite treatment should be considered for patients with a first unprovoked VTE given its higher associated recurrence risk, and it is recommended to discontinue anticoagulant treatment after three months for patients with a provoked VTE. However, the definition of provoked

1  
2  
3 VTE varies between guidelines, between centres, and over time, highlighting the clinical ambiguity  
4 surrounding this decision.(16) In addition, basing the decision on treatment duration solely on the  
5  
6 classification of the first event into provoked or unprovoked may be too crude: a study from our  
7  
8 group showed that the c-statistic of the (un)provoked status was only 0.61, indicating that the ability  
9  
10 to distinguish patients at low and high risk of recurrence is limited. In fact, 15% of patients with a  
11  
12 first provoked VTE had a predicted two-years recurrence risk of more than 10%, whereas this risk  
13  
14 was below 10% in 45% of the patients with a first unprovoked VTE.(17) This finding indicates that  
15  
16 these patient groups would have been under- or overtreated if the current guidelines were strictly  
17  
18 followed (without accounting for bleeding risk or patient preferences).(11-15,17) Furthermore,  
19  
20 guidelines advise to take the risk of major bleeding into account, but guidance on how to best assess  
21  
22 the risk of major bleeding and balance this against the risk of VTE is not available.(11-15,18)  
23  
24 Moreover, studies investigating the optimal duration of anticoagulation in relation to patient-  
25  
26 relevant outcomes such as quality of life are lacking.(19) Therefore, in current clinical practice the  
27  
28 decision to stop or continue treatment indefinitely is based on insufficient information. For these  
29  
30 reasons, more elaborate individualised risk stratification in combination with knowledge on the  
31  
32 optimal treatment duration, linked to these risks, is expected to reduce both types of serious  
33  
34 complications.  
35  
36  
37  
38  
39  
40  
41

42 Multiple prediction models have been developed to assess the risk of VTE recurrence and  
43  
44 major bleeding in VTE patients.(20) (21) At the time we started to design the present study (2018),  
45  
46 models for the prediction of VTE recurrence included the Men and HERDOO2 rule, Vienna prediction  
47  
48 model, DASH score, DAMOVES score, pre- and post D-dimer strategy, Worcester VTE score, and L-  
49  
50 TRRiP model.(17,22-27) Of these, the L-TRRiP model is the only externally validated model that  
51  
52 predicts long-term recurrence risk after a provoked as well as an unprovoked first VTE, which allows  
53  
54 for easier use given the problems related to the distinction between provoked and unprovoked VTE  
55  
56 as described above. In addition, it allows for more precise risk stratification by providing an absolute  
57  
58 recurrence risk, rather than dichotomising high and low recurrence risk. Another advantage of the L-  
59  
60

1  
2  
3 TRRiP model is that all parameters can be determined *during* anticoagulant treatment, so  
4  
5 interruption or discontinuation of the treatment is not required, in contrast to some other models  
6  
7 that include D-dimer, a biomarker predictor that needs to be measured after a short interruption of  
8  
9 anticoagulation. Besides being unpractical, such interruption – albeit relatively rare – may lead to  
10  
11 early recurrent VTE events shortly after discontinuation.(28)  
12  
13  
14

15 Models to predict major bleeding during anticoagulant therapy have mainly been developed  
16  
17 for atrial fibrillation (AF) patients. Examples of such models are the HAS-BLED score and  
18  
19 HEMORR<sub>2</sub>HAGES score.(29,30) Nevertheless, in current clinical practice these models are sometimes  
20  
21 also used to predict major bleeding among VTE patients.(12,18) However, patient characteristics  
22  
23 differ between AF and VTE patients, and the predictive performance of these models in VTE patients  
24  
25 is limited.(20) Therefore, dedicated models for VTE patients have been developed, which include the  
26  
27 score developed by Kuijer et al., the ACCP risk table, the RIETE score, and VTE-BLEED score.(11,31-  
28  
29 34) Of these, the VTE-BLEED score is among the most externally validated models, has been  
30  
31 validated during extended anticoagulant therapy and has shown a good predictive performance in  
32  
33 patients using VKAs as well as in those using DOACs.(18,35-38)  
34  
35  
36  
37

38 Previous attempts have been made to optimize the length of treatment of patients after a  
39  
40 first VTE based on individualised assessment of recurrent VTE risk.(28,39) One study showed a clear  
41  
42 benefit of prolonged anticoagulant treatment compared with discontinuation on recurrent VTE in  
43  
44 patients with an unprovoked VTE and elevated d-dimer levels one month after ceasing anticoagulant  
45  
46 treatment (2.9% vs 15% during 9-18 months follow-up respectively).(39) However, the incidence of  
47  
48 recurrent VTE in patients with normal d-dimer levels (in whom anticoagulation was therefore  
49  
50 stopped) was still high (6-7% per patient-year),(39,40) indicating d-dimer alone cannot be used to  
51  
52 guide anticoagulant treatment duration. Another study showed that prolonging anticoagulant  
53  
54 treatment based on the Vienna score versus routine clinical care did not improve the clinical  
55  
56 outcome in the randomised groups, albeit that the risk of actual recurrent VTE was indeed low in  
57  
58  
59  
60

1  
2  
3 those with a low predicted risk based upon the Vienna score.(28) Likewise, a management study  
4  
5 implementing the HERDOO2 rule showed that women with a low predicted recurrence risk had  
6  
7 indeed a low risk of VTE recurrence after anticoagulant discontinuation.(41) However, the benefit of  
8  
9 extended anticoagulation in the patients with a high risk of VTE recurrence remains uncertain.  
10  
11 Furthermore, none of these studies included patients with a first provoked VTE or applied a bleeding  
12  
13 risk model next to the prediction of recurrence risk. Currently, none of these strategies is  
14  
15 recommended by the guidelines.  
16  
17  
18  
19  
20  
21  
22

23 In summary, the current strategy to decide on (dis)continuation of anticoagulant treatment  
24  
25 after a first VTE is not optimal since 1) the definition of provoked VTE is subject to debate, 2) the  
26  
27 insufficient discriminative power of a distinction between provoked and unprovoked VTE is  
28  
29 disregarded, and 3) the risk of major bleeding is not properly taken into account, and 4) patient  
30  
31 relevant outcomes such as quality of life are not taken into account. This results in both over- and  
32  
33 undertreatment with anticoagulants in a proportion of patients with a first VTE, leading to  
34  
35 unnecessary high life-time risks of major bleeding or recurrent VTE, respectively. Although some  
36  
37 novel strategies have been studied, this has not resulted in a more tailored strategy to determine  
38  
39 optimal treatment duration. Therefore, in the Leiden Thrombosis Recurrence Risk Prevention (L-  
40  
41 TRRiP) study we aim to evaluate outcomes of tailored duration of anticoagulant treatment based on  
42  
43 individualised risk assessment of a patient's recurrent VTE and major bleeding risk, using both the L-  
44  
45 TRRiP and VTE-BLEED model.  
46  
47  
48  
49  
50  
51  
52

## 53 **METHODS AND ANALYSIS**

### 54 **Study design**

55  
56  
57  
58  
59  
60

1  
2  
3 The L-TRRiP study is a multicentre, open-label, cohort-based randomised controlled trial. The  
4 L-TRRiP and VTE-BLEED prediction models are used to individually classify patients according to their  
5 risk of recurrent VTE (as low, intermediate, or high) and major bleeding (as low or high), respectively.  
6  
7 After the initial three months, anticoagulant treatment is stopped in patients with a low recurrent  
8 VTE risk, while patients with a high recurrent VTE risk and low major bleeding risk continue  
9 treatment. Patients in the other risk groups (i.e., patients with an intermediate recurrent VTE risk or  
10 a high recurrent VTE risk and high bleeding risk) are randomised to continue or discontinue  
11 anticoagulant treatment (**figure 1**). All patients, both in the non-randomised and randomised arms,  
12 are followed for at least two years, following the same procedures. Academic hospitals, teaching  
13 hospitals, and general hospitals from the Netherlands participate in this trial. At this time, the trial  
14 has started enrolment in 17 hospitals (see **Appendix I**). Study enrolment started in 2021, the first  
15 patient was enrolled in June 2021. The planned end date of the study is 2027, two years after  
16 enrolment of the last patient, which is expected to be in 2025. The L-TRRiP study is registered at the  
17 Dutch Trial Registry: NL9003 and ClinicalTrials.gov: NCT06087952. The Standard Protocol Items:  
18 Recommendations for Interventional Trials (SPIRIT) guidelines were followed when drafting the  
19 study protocol.  
20  
21  
22  
23  
24  
25  
26  
27  
28  
29  
30  
31  
32  
33  
34  
35  
36  
37  
38  
39  
40  
41  
42

### 43 **Study population**

44  
45 Patients with a first confirmed symptomatic distal or proximal deep venous thrombosis  
46 (DVT) of the lower extremity or pulmonary embolism (PE) with an indication for anticoagulant  
47 treatment for at least three months, aged 18 years or above, who provide informed consent prior to  
48 any study specific procedure, are eligible to participate in this trial. Patients with active cancer,  
49 known antiphospholipid syndrome, those who have an indication other than VTE for prolonged  
50 anticoagulant treatment (e.g., atrial fibrillation), who have an indication for long-term antiplatelet  
51 therapy despite the use of oral anticoagulation (e.g., recent myocardial infarction) or who have an  
52  
53  
54  
55  
56  
57  
58  
59  
60



1  
2  
3 extremely high bleeding risk necessitating discontinuation of anticoagulant treatment will be  
4 excluded. Diagnostic testing for malignancy or antiphospholipid syndrome after the index VTE  
5  
6 diagnosis is performed at the discretion of the treating physician. Patients with VTE related to severe  
7  
8 COVID-19 (i.e., requiring hospital admission in three months before the index event) as well as  
9  
10 patients with vaccine-induced immune thrombotic thrombocytopenia (VITT) are not eligible to  
11  
12 participate in this trial since the effect of these conditions on recurrence is not known, and such  
13  
14 patients were not included in derivation of the L-TRRiP model.(17)  
15  
16  
17  
18  
19  
20  
21  
22

### 23 **Risk prediction models**

24  
25 The L-TRRiP model includes sex, type and location of VTE, risk factors for VTE, history of  
26  
27 cardiovascular disease as well as blood group non-O and the factor V Leiden mutation to predict the  
28  
29 absolute two-year risk of recurrent VTE. A predicted two-year VTE risk below 6% is classified as low,  
30  
31 a VTE risk of 6-14% as intermediate and a VTE risk above 14% as high (see **Table 1**).<sup>(17)</sup> The VTE-  
32  
33 BLEED model uses age of 60 years or higher, renal dysfunction, anaemia, history of clinically relevant  
34  
35 or major bleeding, active malignancy, and uncontrolled hypertension in male patients to predict  
36  
37 major bleeding risk. A score <2 is classified as low bleeding risk and a score ≥2 as high bleeding risk  
38  
39  
40  
41 **(Table 2)**.<sup>(33)</sup>  
42  
43  
44  
45  
46  
47

### 48 **Procedures**

49  
50 After providing informed consent, patients are asked to fill in a questionnaire including  
51  
52 demographic variables, clinical circumstances and risk factors for the first VTE, and past medical  
53  
54 history including previous bleeding. Furthermore, a self-administered buccal swab is taken to assess  
55  
56 the factor V Leiden mutation and ABO blood group by DNA analysis. Information is obtained from  
57  
58  
59  
60

1  
2  
3 the electronic health records from the hospital including recent haemoglobin level, renal function,  
4 blood pressure, comorbidities, and details regarding the first VTE event (type and location of VTE).  
5  
6  
7

8 Based on this information, the L-TRRiP and VTE-BLEED scores and corresponding risk  
9 categories are calculated in the coordinating centre (Leiden University Medical Center). Depending  
10 on the risk category of the patient, a decision on duration of treatment is either made immediately,  
11 or the duration of treatment is randomised (**Figure 1**).  
12  
13  
14  
15  
16

17  
18 When applicable, randomisation is performed shortly before the routine three month visit in  
19 the coordinating centre using the randomisation function in CastorEDC to ensure concealment of  
20 treatment allocation.<sup>(42)</sup> Randomisation is performed in a 1:1 ratio, using variable block  
21 randomisation with a block size of two, four, or six stratified by study centre, risk group for recurrent  
22 VTE and bleeding to ensure equal distribution of the patients. The treating physician receives the risk  
23 classification of recurrent VTE and major bleeding risk, and the corresponding treatment duration or  
24 outcome of randomisation shortly before the routine three month visit and discusses this with the  
25 patient.  
26  
27  
28  
29  
30  
31  
32  
33  
34  
35

36 Patients who are allocated to continue anticoagulant treatment can remain on the same  
37 anticoagulant or switch anticoagulants at the discretion of their treating physician. In the  
38 Netherlands, DOACs (apixaban, dabigatran, edoxaban, and rivaroxaban) as well as VKAs  
39 (acenocoumarol and phenprocoumon) and low-molecular-weight heparins (LMWHs) are registered  
40 for the treatment of VTE. Dose reduction of apixaban or rivaroxaban according to current guidelines  
41 after the initial six months is allowed, at the discretion of the treating physician. In case the treating  
42 physician and/or patient decides to deviate from the treatment duration, the reasons for deviation  
43 are registered, and patients will complete follow-up as usual.  
44  
45  
46  
47  
48  
49  
50  
51  
52  
53  
54  
55  
56  
57

## 58 **Follow-up**

59  
60

1  
2  
3 All patients (both the randomised and the non-randomised groups) are followed for at least  
4  
5 two years. The follow-up starts at the routine three month visit after the first VTE, shortly after  
6  
7 randomisation, if applicable. During the first two years they will fill in a standardised questionnaire  
8  
9 every three months, which is sent and processed by the coordinating centre. After the first two years  
10  
11 of follow-up patients will fill in a questionnaire once every year for the remaining study duration  
12  
13 (i.e., as expected until 2027), implying that the total duration of follow-up is expected to vary  
14  
15 between two (patients enrolled in 2025) and six years (patients enrolled in 2021). Since the follow-  
16  
17 up beyond two years was not originally planned, but added to the protocol in an amendment which  
18  
19 was approved in October 2023, patients enrolled before this time will be asked separately for  
20  
21 informed consent for the additional follow-up period.  
22  
23  
24  
25

26 The follow-up questionnaires are set up to screen for recurrent VTE, (major) bleeding events  
27  
28 and other (severe) adverse events. To prevent missing outcome information, we will contact  
29  
30 patients by telephone when they do not return the questionnaire. In addition, at the time of  
31  
32 inclusion patients provide consent to request information on recurrent VTE and bleeding from their  
33  
34 treating physician and general practitioner, which allows us to collect information from them and  
35  
36 detect the primary outcomes even if a patient does not respond to the questionnaires.  
37  
38  
39

40 In case of a reported recurrent VTE or bleeding event, additional information is retrieved  
41  
42 from the medical records of the hospital or general practitioner for adjudication. Adverse events  
43  
44 related to the study intervention are registered. All severe adverse events, including death and non-  
45  
46 elective hospitalisation, are reported to the institutional review board. The questionnaire is also  
47  
48 used to evaluate anticoagulant treatment use and remaining symptoms of VTE. Furthermore, we  
49  
50 evaluate quality of life by means of the EQ-5D-5L questionnaire.<sup>(43)</sup> Also, functional recovery is  
51  
52 assessed using the post-VTE functional scale (PVFS).<sup>(44,45)</sup> In order to perform a cost-effectiveness  
53  
54 analysis, we measure healthcare consumption and productivity losses during the first two years of  
55  
56 follow-up by using Medical Consumption Questionnaire (iMTA MCQ) and Productivity Costs  
57  
58  
59  
60

1  
2  
3 Questionnaire (iMTA PCQ) from the institute for Medical Technology Assessment. All questionnaires  
4  
5 are offered digitally (via CastorEDC) or by regular mail as preferred by the participant.  
6  
7

8 Overall, the study is designed to follow general clinical practice as closely as possible, to  
9  
10 optimize generalisability of the results, and to lower the burden for the patients.  
11  
12  
13  
14  
15

## 16 **Outcomes**

17  
18  
19 For the randomised group, the primary outcome is a composite endpoint of recurrent VTE  
20  
21 and major bleeding at two years. Recurrent VTE is diagnosed after clinical suspicion is objectively  
22  
23 confirmed by diagnostic imaging, according to current guidelines.(46,47) Bleeding events will be  
24  
25 classified as major, clinically relevant non-major (CRNMB) or minor according to the current  
26  
27 guidelines of the International Society of Thrombosis and Haemostasis (ISTH): major bleeding is  
28  
29 defined as fatal bleeding, symptomatic bleeding in a critical area or organ or bleeding causing a fall  
30  
31 in haemoglobin level of 2 g/dL (1.24 mmol/L) or more, or leading to transfusion of two or more units  
32  
33 of whole blood or red cells; CRNMB is defined as any bleeding that does not fit the criteria for major  
34  
35 bleeding, but does require medical intervention, lead to hospitalisation or increased care level or  
36  
37 prompt face to face evaluation.(48,49)  
38  
39  
40  
41

42 All clinical outcomes will be evaluated and classified by an independent committee blinded  
43  
44 for treatment allocation using discharge letters, radiology reports and other relevant information  
45  
46 retrieved from the medical records. In case of a recurrent VTE or (major) bleeding event, patients  
47  
48 will be treated according to the local clinical practice, meaning that (dis)continuing anticoagulant  
49  
50 treatment at that point is at the discretion of the treating physician.  
51  
52  
53

54 Secondary outcomes are 1) the combined incidence of recurrent VTE and major bleeding  
55  
56 events (primary outcome) weighted by the associated loss of quality adjusted life years (QALYs) and  
57  
58 functional limitations (PFVS) in the randomised group; 2) cost-effectiveness of prolonged  
59  
60

1  
2  
3 anticoagulant treatment compared to discontinuation in the randomised groups; 3) the incidence of  
4 recurrent VTE and major bleeding and CRNMB at two years and during entire follow-up in all  
5 groups; 4) the predictive performance (discrimination and calibration) of the L-TRRiP and VTE-BLEED  
6 model in the arms that discontinue and continue, respectively and 5) the natural course of recovery  
7 from a first acute VTE with regard to long-term functional limitations using the PVFS.  
8  
9  
10  
11  
12  
13  
14  
15  
16  
17

### 18 **Data collection**

19  
20  
21 Data are collected and stored pseudonymised using the web-based data management  
22 platform CastorEDC.<sup>(42)</sup> Personal information of included participants is securely shared with the  
23 coordinating centre for them to send the questionnaires and buccal swab and contact the  
24 participants if needed. To optimize data quality, the digital data collection forms include checks for  
25 important study variables, such as range checks for continuous variables, check of the assigned risk  
26 categories, and verification of relevant medical history included in the prediction models by both the  
27 study team as well as the patient (via the baseline questionnaire).  
28  
29  
30  
31  
32  
33  
34  
35  
36  
37  
38  
39

### 40 **Sample size calculation**

41  
42  
43 The sample size of this study is based on the randomised part of the study. Based on the  
44 estimated risks of recurrent VTE and major bleeding as observed in the derivation studies of both  
45 prediction models,<sup>(17,33)</sup> we assume an overall two-year recurrent VTE risk of 10% in the  
46 discontinuation arm of the randomised groups and a major bleeding risk of 0.6%. Assuming a  
47 reduction of the recurrent VTE risk of 85% by anticoagulant treatment, the recurrent VTE risk of the  
48 group that continues anticoagulant treatment will be 1.5%. Furthermore, we estimate this will lead  
49 to an increase in the overall risk of major bleeding to 2.1%. To demonstrate a 7% absolute difference  
50 in the combined endpoint (i.e., 10.6% vs 3.6%) with an alpha of 0.05 and a power of 90%, we need a  
51  
52  
53  
54  
55  
56  
57  
58  
59  
60

1  
2  
3 sample size of 552 subjects for the randomised part of the study. Taking into account a drop-out rate  
4  
5 of 10%, we aim to include 608 patients in the randomised part of the study. Based on the derivation  
6  
7 studies we expect the randomised group to form about 38% of the total included population, in  
8  
9 which case we expect to include approximately 1600 patients in total; 848 (53%) in the low VTE  
10  
11 recurrence risk group and 144 (9%) in the high recurrence and low bleeding risk group.(17,33) Of  
12  
13 note, these numbers may change depending on the final proportion of the randomised group.  
14  
15  
16  
17  
18  
19

### 20 **Data analysis plan**

21  
22  
23 Baseline characteristics will be summarised using descriptive statistics (mean, standard  
24  
25 deviation [SD] or median, interquartile range (IQR); number, percentage). Furthermore, we will  
26  
27 present the number of patients who continued anticoagulant treatment while being allocated to  
28  
29 discontinuation and vice versa (cross-over), including the reason for switching anticoagulant  
30  
31 treatment. In case of missing data, we will perform multiple imputation if indicated (depending on  
32  
33 the amount and nature of the missingness) and pool the results according to Rubin's rules.(50)  
34  
35

#### 36 *Randomised group:*

37  
38  
39  
40 Following an intention-to-treat analysis, the cumulative incidence of the primary outcome in  
41  
42 the randomised group at two years will be estimated using the cumulative incidence competing risk  
43  
44 method, accounting for the competing risk of death from other causes than VTE or major bleeding.  
45  
46 Follow-up will start at the time of the three month visit. We will censor patients when they withdraw  
47  
48 informed consent, are lost to follow-up, or reach the end of the study follow-up period. Hazard  
49  
50 ratios (HRs) and corresponding 95% confidence intervals (CIs) will be estimated using a Cox  
51  
52 regression model.  
53  
54

55  
56 As secondary analyses, we will perform a per-protocol analysis, in which patients who did  
57  
58 not receive the allocated treatment during the complete follow up will be censored at the time of  
59  
60

1  
2  
3 the protocol deviation. In case of a different distribution of risk factors between the treatment  
4 groups due to chance, adjusted HRs and 95% CIs will be estimated. The primary outcome (i.e.,  
5 recurrent VTE and major bleeding) will be weighted for the impact on quality of life (EQ-5D) and  
6 functional limitations (PFVS) (in two separate analyses) using the difference between the measures  
7 taken after and the last one before the event as weights. Furthermore, we will estimate the  
8 incidence of recurrent VTE and major bleeding during the entire follow-up, estimate the cumulative  
9 incidence of CRNMB and assess repeated events (e.g., CRNMB followed by major bleeding) using  
10 negative binomial regression.  
11  
12  
13  
14  
15  
16  
17  
18  
19  
20

21  
22 Health-care costs will be calculated using Dutch standard prices for economic  
23 evaluations.(51,52) Absence from work will be valued with friction cost method. QALYs will be  
24 assessed using the EQ-5D-5L scores (Dutch tariff(53)) at different timepoints, using the area-under-  
25 the-curve approach. The economic evaluation will consist of a cost-effectiveness analysis, comparing  
26 costs per event, as well as a cost-utility analysis, comparing costs per QALY. In net-benefit analysis,  
27 costs will be related to effectiveness and presented in a cost-effectiveness acceptability curve.  
28  
29  
30  
31  
32  
33  
34  
35

#### 36 *Non-randomised group:*

37  
38 The cumulative incidences of recurrent VTE, major bleeding and CRNMB at two years and  
39 during the entire follow-up in the non-randomised groups will be calculated, using the same  
40 approach as in the randomised groups.  
41  
42  
43  
44  
45

#### 46 *All participants:*

47  
48 We will assess the difference in recommended treatment duration as allocated in the study  
49 to treatment duration according to the guidelines (i.e., continuation in unprovoked and  
50 discontinuation in provoked VTE). We will determine the predictive performance of the L-TRRiP  
51 model in all patients that discontinued anticoagulant treatment (since the L-TRRiP model is  
52 developed to predict the risk of VTE recurrence after discontinuation) by creating a calibration plot  
53  
54  
55  
56  
57  
58  
59  
60

1  
2  
3 containing the observed and predicted two-years risks of recurrent VTE. Likewise, we will determine  
4 the predictive performance of the VTE-BLEED model in all patients who continued anticoagulant  
5 treatment, although observed risks will be plotted against the total score as absolute predicted risks  
6 are not provided by the model. For the analysis of functional recovery, an ordinal logistic regression  
7 model will be used.  
8  
9  
10  
11  
12  
13  
14  
15  
16

### 17 **Patient and Public Involvement statement**

18  
19  
20 The L-TRRiP study is investigator initiated. An advisory board, consisting of five patients with  
21 a history of VTE, is involved in the practical implementation of the trial, such as patient recruitment  
22 and dissemination of study results among patients. In order to make the results of the study  
23 accessible to patients, we will publish a Dutch summary.  
24  
25  
26  
27  
28  
29  
30  
31  
32

### 33 **ETHICS AND DISSEMINATION**

34  
35 The L-TRRiP study will be conducted according to the principles of Good Research Practice and in  
36 accordance with the applying Dutch laws (the Medical Research Involving Human Subjects Act  
37 [WMO] and General Data Protection Regulation [GDPR]). The protocol is approved by the Medical  
38 Research Ethics Committee Leiden – Den Haag - Delft, the Netherlands. Monitoring will be executed  
39 by monitors working for the coordinating centre who are independent of the study investigators, to  
40 ensure compliance with the protocol, Good Research Practice and legal aspects.  
41  
42  
43  
44  
45  
46  
47  
48  
49

50 Results are expected in 2028. Our aim is to disseminate the results by publication in peer-  
51 reviewed journals, professional societies, and through presentations on (inter)national conferences  
52 according to publication standards. After data collection and data cleaning are finished, deidentified  
53 data will be registered in a repository and be made available for further research upon reasonable  
54 request to the corresponding author.  
55  
56  
57  
58  
59  
60



## REFERENCES

1. Khan F, Rahman A, Carrier M, et al. Long term risk of symptomatic recurrent venous thromboembolism after discontinuation of anticoagulant treatment for first unprovoked venous thromboembolism event: systematic review and meta-analysis. *BMJ* 2019;366:l4363. doi: 10.1136/bmj.l4363 %J BMJ
2. Iorio A, Kearon C, Filippucci E, et al. Risk of recurrence after a first episode of symptomatic venous thromboembolism provoked by a transient risk factor: a systematic review. *Arch Intern Med* 2010;170(19):1710-6. doi: 10.1001/archinternmed.2010.367 [published Online First: 2010/10/27]
3. Weitz JI, Prandoni P, Verhamme P. Anticoagulation for Patients with Venous Thromboembolism: When is Extended Treatment Required? *TH Open* 2020;4(4):e446-e56. doi: 10.1055/s-0040-1721735
4. Carrier M, Le Gal G, Wells PS, et al. Systematic review: case-fatality rates of recurrent venous thromboembolism and major bleeding events among patients treated for venous thromboembolism. *Ann Intern Med* 2010;152(9):578-89. doi: 10.7326/0003-4819-152-9-201005040-00008 [published Online First: 2010/05/05]
5. Kahn SR, Shrier I, Julian JA, et al. Determinants and time course of the postthrombotic syndrome after acute deep venous thrombosis. *Ann Intern Med* 2008;149(10):698-707. doi: 10.7326/0003-4819-149-10-200811180-00004 [published Online First: 2008/11/20]
6. Ende-Verhaar YM, Cannegieter SC, Vonk Noordegraaf A, et al. Incidence of chronic thromboembolic pulmonary hypertension after acute pulmonary embolism: a contemporary view of the published literature. *Eur Respir J* 2017;49(2) doi: 10.1183/13993003.01792-2016 [published Online First: 2017/02/25]
7. Middeldorp S, Prins MH, Hutten BA. Duration of treatment with vitamin K antagonists in symptomatic venous thromboembolism. *Cochrane Database Syst Rev* 2014;2014(8):Cd001367. doi: 10.1002/14651858.CD001367.pub3 [published Online First: 2014/08/06]
8. Khan F, Tritschler T, Kimpton M, et al. Long-term Risk of Recurrent Venous Thromboembolism Among Patients Receiving Extended Oral Anticoagulant Therapy for First Unprovoked Venous Thromboembolism.n/a(n/a) doi: <https://doi.org/10.1111/jth.15491>
9. Khan F, Tritschler T, Kimpton M, et al. Long-Term Risk for Major Bleeding During Extended Oral Anticoagulant Therapy for First Unprovoked Venous Thromboembolism : A Systematic Review and Meta-analysis. *Ann Intern Med* 2021;174(10):1420-29. doi: 10.7326/m21-1094 [published Online First: 2021/09/14]
10. Baglin T, Bauer K, Douketis J, et al. Duration of anticoagulant therapy after a first episode of an unprovoked pulmonary embolus or deep vein thrombosis: guidance from the SSC of the ISTH. *J Thromb Haemost* 2012;10(4):698-702. doi: 10.1111/j.1538-7836.2012.04662.x [published Online First: 2012/02/16]

11. Kearon C, Akl EA, Ornelas J, et al. Antithrombotic Therapy for VTE Disease: CHEST Guideline and Expert Panel Report. *Chest* 2016;149(2):315-52. doi: 10.1016/j.chest.2015.11.026 [published Online First: 2016/02/13]
12. NICE. Venous thromboembolic diseases: diagnosis, management and thrombophilia testing. *National Institute for Health and Care Excellence, London* 2020
13. Konstantinides SV, Meyer G, Becattini C, et al. 2019 ESC Guidelines for the diagnosis and management of acute pulmonary embolism developed in collaboration with the European Respiratory Society (ERS). *Eur Heart J* 2020;41(4):543-603. doi: 10.1093/eurheartj/ehz405 [published Online First: 2019/09/11]
14. Ortel TL, Neumann I, Ageno W, et al. American Society of Hematology 2020 guidelines for management of venous thromboembolism: treatment of deep vein thrombosis and pulmonary embolism. *Blood Adv* 2020;4(19):4693-738. doi: 10.1182/bloodadvances.2020001830 [published Online First: 2020/10/03]
15. Stevens SM, Woller SC, Kreuziger LB, et al. Antithrombotic Therapy for VTE Disease: Second Update of the CHEST Guideline and Expert Panel Report. *Chest* 2021;160(6):e545-e608. doi: 10.1016/j.chest.2021.07.055 [published Online First: 2021/08/06]
16. Kearon C, Ageno W, Cannegieter SC, et al. Categorization of patients as having provoked or unprovoked venous thromboembolism: guidance from the SSC of ISTH. *J Thromb Haemost* 2016;14(7):1480-3. doi: 10.1111/jth.13336 [published Online First: 2016/07/20]
17. Timp JF, Braekkan SK, Lijfering WM, et al. Prediction of recurrent venous thrombosis in all patients with a first venous thrombotic event: The Leiden Thrombosis Recurrence Risk Prediction model (L-TRRiP). *PLoS Med* 2019;16(10):e1002883. doi: 10.1371/journal.pmed.1002883 [published Online First: 2019/10/12]
18. den Exter PL, Woller SC, Robert-Ebadi H, et al. Management of bleeding risk in patients who receive anticoagulant therapy for venous thromboembolism: Communication from the ISTH SSC Subcommittee on Predictive and Diagnostic Variables in Thrombotic Disease. *J Thromb Haemost* 2022;20(8):1910-19. doi: 10.1111/jth.15776 [published Online First: 2022/06/24]
19. de Jong CMM, Rosovsky RP, Klok FA. Outcomes of venous thromboembolism care: future directions. *J Thromb Haemost* 2023;21(5):1082-89. doi: 10.1016/j.jtha.2023.02.015 [published Online First: 20230228]
20. de Winter MA, van Es N, Büller HR, et al. Prediction models for recurrence and bleeding in patients with venous thromboembolism: A systematic review and critical appraisal. *Thromb Res* 2021;199:85-96. doi: 10.1016/j.thromres.2020.12.031 [published Online First: 2021/01/24]
21. Burggraaf JLI, van Rein N, Klok FA, et al. How to predict recurrent venous thromboembolism and bleeding? A review of recent advances and their implications. *Pol Arch Intern Med* 2023;133(5) doi: 10.20452/pamw.16492 [published Online First: 2023/05/08]
22. Rodger MA, Kahn SR, Wells PS, et al. Identifying unprovoked thromboembolism patients at low risk for recurrence who can discontinue anticoagulant therapy. *CMAJ* 2008;179(5):417-26. doi: 10.1503/cmaj.080493 [published Online First: 2008/08/30]
23. Eichinger S, Heinze G, Jandeck LM, et al. Risk assessment of recurrence in patients with unprovoked deep vein thrombosis or pulmonary embolism: the Vienna prediction model. *Circulation* 2010;121(14):1630-6. doi: 10.1161/circulationaha.109.925214 [published Online First: 2010/03/31]
24. Tosetto A, Iorio A, Marcucci M, et al. Predicting disease recurrence in patients with previous unprovoked venous thromboembolism: a proposed prediction score (DASH). *J Thromb Haemost* 2012;10(6):1019-25. doi: 10.1111/j.1538-7836.2012.04735.x [published Online First: 2012/04/12]
25. Franco Moreno AI, García Navarro MJ, Ortiz Sánchez J, et al. A risk score for prediction of recurrence in patients with unprovoked venous thromboembolism (DAMOVES). *Eur J Intern Med* 2016;29:59-64. doi: 10.1016/j.ejim.2015.12.010 [published Online First: 2016/01/18]

- 1  
2  
3  
4  
5  
6  
7  
8  
9  
10  
11  
12  
13  
14  
15  
16  
17  
18  
19  
20  
21  
22  
23  
24  
25  
26  
27  
28  
29  
30  
31  
32  
33  
34  
35  
36  
37  
38  
39  
40  
41  
42  
43  
44  
45  
46  
47  
48  
49  
50  
51  
52  
53  
54  
55  
56  
57  
58  
59  
60
26. Ensor J, Riley RD, Jowett S, et al. Prediction of risk of recurrence of venous thromboembolism following treatment for a first unprovoked venous thromboembolism: systematic review, prognostic model and clinical decision rule, and economic evaluation. *Health Technol Assess* 2016;20(12):i-xxxiii, 1-190. doi: 10.3310/hta20120 [published Online First: 2016/02/18]
  27. Huang W, Goldberg RJ, Anderson FA, et al. Occurrence and predictors of recurrence after a first episode of acute venous thromboembolism: population-based Worcester Venous Thromboembolism Study. *J Thromb Thrombolysis* 2016;41(3):525-38. doi: 10.1007/s11239-015-1301-8 [published Online First: 2016/02/06]
  28. Geersing GJ, Hendriksen JMT, Zuithoff NPA, et al. Effect of tailoring anticoagulant treatment duration by applying a recurrence risk prediction model in patients with venous thromboembolism compared to usual care: A randomized controlled trial. *PLoS Med* 2020;17(6):e1003142. doi: 10.1371/journal.pmed.1003142 [published Online First: 2020/06/27]
  29. Pisters R, Lane DA, Nieuwlaat R, et al. A novel user-friendly score (HAS-BLED) to assess 1-year risk of major bleeding in patients with atrial fibrillation: the Euro Heart Survey. *Chest* 2010;138(5):1093-100. doi: 10.1378/chest.10-0134 [published Online First: 2010/03/20]
  30. Gage BF, Yan Y, Milligan PE, et al. Clinical classification schemes for predicting hemorrhage: results from the National Registry of Atrial Fibrillation (NRAF). *Am Heart J* 2006;151(3):713-9. doi: 10.1016/j.ahj.2005.04.017 [published Online First: 2006/03/01]
  31. Kuijter PM, Hutten BA, Prins MH, et al. Prediction of the risk of bleeding during anticoagulant treatment for venous thromboembolism. *Arch Intern Med* 1999;159(5):457-60. doi: 10.1001/archinte.159.5.457 [published Online First: 1999/03/13]
  32. Ruíz-Giménez N, Suárez C, González R, et al. Predictive variables for major bleeding events in patients presenting with documented acute venous thromboembolism. Findings from the RIETE Registry. *Thromb Haemost* 2008;100(1):26-31. doi: 10.1160/th08-03-0193 [published Online First: 2008/07/10]
  33. Klok FA, Hosel V, Clemens A, et al. Prediction of bleeding events in patients with venous thromboembolism on stable anticoagulation treatment. *Eur Respir J* 2016;48(5):1369-76. doi: 10.1183/13993003.00280-2016 [published Online First: 2016/11/02]
  34. Kearon C, Akl EA, Comerota AJ, et al. Antithrombotic therapy for VTE disease: Antithrombotic Therapy and Prevention of Thrombosis, 9th ed: American College of Chest Physicians Evidence-Based Clinical Practice Guidelines. *Chest* 2012;141(2 Suppl):e419S-e96S. doi: 10.1378/chest.11-2301 [published Online First: 2012/02/15]
  35. Klok FA, Barco S, Konstantinides SV. External validation of the VTE-BLEED score for predicting major bleeding in stable anticoagulated patients with venous thromboembolism. *Thromb Haemost* 2017;117(6):1164-70. doi: 10.1160/th16-10-0810 [published Online First: 2017/03/10]
  36. Klok FA, Barco S, Turpie AGG, et al. Predictive value of venous thromboembolism (VTE)-BLEED to predict major bleeding and other adverse events in a practice-based cohort of patients with VTE: results of the XALIA study. *Br J Haematol* 2018;183(3):457-65. doi: 10.1111/bjh.15533 [published Online First: 2018/08/21]
  37. Klok FA, Huisman MV. How I assess and manage the risk of bleeding in patients treated for venous thromboembolism. *Blood* 2020;135(10):724-34. doi: 10.1182/blood.2019001605 [published Online First: 2020/01/18]
  38. Nishimoto Y, Yamashita Y, Morimoto T, et al. Validation of the VTE-BLEED score's long-term performance for major bleeding in patients with venous thromboembolisms: From the COMMAND VTE registry. *J Thromb Haemost* 2020;18(3):624-32. doi: 10.1111/jth.14691 [published Online First: 2019/12/01]
  39. Palareti G, Cosmi B, Legnani C, et al. D-dimer testing to determine the duration of anticoagulation therapy. *N Engl J Med* 2006;355(17):1780-9. doi: 10.1056/NEJMoa054444 [published Online First: 2006/10/27]

- 1  
2  
3  
4  
5  
6  
7  
8  
9  
10  
11  
12  
13  
14  
15  
16  
17  
18  
19  
20  
21  
22  
23  
24  
25  
26  
27  
28  
29  
30  
31  
32  
33  
34  
35  
36  
37  
38  
39  
40  
41  
42  
43  
44  
45  
46  
47  
48  
49  
50  
51  
52  
53  
54  
55  
56  
57  
58  
59  
60
40. Kearon C, Spencer FA, O'Keeffe D, et al. D-dimer testing to select patients with a first unprovoked venous thromboembolism who can stop anticoagulant therapy: a cohort study. *Ann Intern Med* 2015;162(1):27-34. doi: 10.7326/m14-1275 [published Online First: 2015/01/07]
  41. Rodger MA, Le Gal G, Anderson DR, et al. Validating the HERDOO2 rule to guide treatment duration for women with unprovoked venous thrombosis: multinational prospective cohort management study. *BMJ* 2017;356:j1065. doi: 10.1136/bmj.j1065 [published Online First: 2017/03/21]
  42. Castor EDC. Castor Electronic Data Capture 2019 [27 Aug. 2019]. Available from: <https://castoredc.com> accessed August 28, 2019.
  43. Herdman M, Gudex C, Lloyd A, et al. Development and preliminary testing of the new five-level version of EQ-5D (EQ-5D-5L). *Quality of life research : an international journal of quality of life aspects of treatment, care and rehabilitation* 2011;20(10):1727-36. doi: 10.1007/s11136-011-9903-x [published Online First: 2011/04/12]
  44. Boon G, Barco S, Bertolotti L, et al. Measuring functional limitations after venous thromboembolism: Optimization of the Post-VTE Functional Status (PVFS) Scale. *Thromb Res* 2020;190:45-51. doi: 10.1016/j.thromres.2020.03.020 [published Online First: 2020/04/17]
  45. Gwozdz AM, de Jong CMM, Fialho LS, et al. Development of an international standard set of outcome measures for patients with venous thromboembolism: an International Consortium for Health Outcomes Measurement consensus recommendation. *The Lancet Haematology* 2022;9(9):e698-e706. doi: 10.1016/s2352-3026(22)00215-0
  46. Diagnostiek, preventie en behandeling van veneuze trombo-embolie en secundaire preventie van arteriële trombose: Kwaliteitsinstituut voor de Gezondheidszorg CBO, 2008.
  47. Richtlijn Antitrombotisch beleid - Continueren antistolling na acute veneuze tromboembolie: Federatie Medisch Specialisten; [updated 15-11-2021; cited 2022 02-11-2022]. Available from: [https://richtlijndatabase.nl/richtlijn/antitrombotisch\\_beleid/therapie\\_vte/continueren\\_antistolling\\_na\\_acute\\_veneuze\\_tromboembolie.html](https://richtlijndatabase.nl/richtlijn/antitrombotisch_beleid/therapie_vte/continueren_antistolling_na_acute_veneuze_tromboembolie.html).
  48. Kaatz S, Ahmad D, Spyropoulos AC, et al. Definition of clinically relevant non-major bleeding in studies of anticoagulants in atrial fibrillation and venous thromboembolic disease in non-surgical patients: communication from the SSC of the ISTH. 2015;13(11):2119-26. doi: 10.1111/jth.13140
  49. Schulman S, Kearon C. Definition of major bleeding in clinical investigations of antihemostatic medicinal products in non-surgical patients. *J Thromb Haemost* 2005;3(4):692-4. doi: 10.1111/j.1538-7836.2005.01204.x [published Online First: 2005/04/22]
  50. Rubin D. Multiple Imputation for Nonresponse in Surveys Wiley J&Sons New York. 1987
  51. Hakkaart-van Roijen L, van der Linden N, Bouwmans CAM, et al. Costing manual: Methodology of costing research and reference prices for economic evaluations in healthcare [in Dutch: Kostenhandleiding: Methodologie van kostenonderzoek en referentieprijzen voor economische evaluaties in de gezondheidszorg]. . 2015
  52. Kanters TA, Bouwmans CAM, van der Linden N, et al. Update of the Dutch manual for costing studies in health care. *PLoS One* 2017;12(11):e0187477. doi: 10.1371/journal.pone.0187477 [published Online First: 2017/11/10]
  53. Versteegh MM, Vermeulen KM, Evers SMAA, et al. Dutch Tariff for the Five-Level Version of EQ-5D. *Value in health : the journal of the International Society for Pharmacoeconomics and Outcomes Research* 2016;19(4):343-52. doi: 10.1016/j.jval.2016.01.003 [published Online First: 2016/06/22]

## Authors contributions

1  
2  
3 SCC, MVH, FAK, GJG and SM designed the study. MEvdA-vM (health-care economics) and SIC  
4  
5 (statistics) contributed to the parts in the protocol on their specific disciplines. JLIB-vD wrote the first  
6  
7 manuscript draft, supervised by NvR and SCC. RHHB, JWKvdB, CYB, MC-vB, MC, ME, YE-V, NvE, CvG,  
8  
9 WKdJ, FK, TK, CK, SK, JL, DL, ATAM, KM, MAvdR, RR, IS, JSH, AWGvdV are involved in the trial  
10  
11 conduct in their affiliations and revised the manuscript. All authors gave final approval of the  
12  
13 version to be published.  
14  
15  
16  
17  
18  
19

## 20 **Acknowledgements**

21  
22  
23 The authors especially acknowledge the participating centres (see **Appendix I**) and the Dutch  
24  
25 Thrombosis Network.  
26  
27  
28  
29

## 30 **Collaborators**

31  
32  
33 The L-TRRiP Investigators: see **Appendix I**.  
34  
35  
36  
37  
38

## 39 **Funding statement**

40  
41  
42 The L-TRRiP study is supported by ZonMw (program Goed Gebruik Geneesmiddelen), the  
43  
44 Netherlands; grant number: 848017007. The funder did not participate in the design of the study  
45  
46 and will have no role in the study conduct, data analysis, interpretation and publication of the data.  
47  
48  
49  
50  
51

## 52 **Conflicts of interest statement**

53  
54  
55 **MC** has received financial support for research from Bayer, CSL Behring, Roche, Novo Nordisk, and  
56  
57 UniQure and fees for lecturing or consultancy from Alexion, Bayer, CSL Behring, Daiichi Sankyo, Sobi,  
58  
59 and Viatrix, all unrelated to the present work and paid to his institution. **NvE** has received a lecture  
60

1  
2  
3 fee from Bristol Myers Squibb, which was unrelated to this work and paid to his institution. **JL**  
4  
5 reports grants or contracts from BMS-Pfizer, Viatris, AstraZeneca en Synapse, all unrelated to this  
6  
7 work and paid to her institution. **KM** reports speaker fees from Alexion, Bayer and CSL Behring,  
8  
9 participation in trial steering committees for Bayer and Astra Zeneca, consulting fees from Uniqure,  
10  
11 participation in data monitoring and endpoint adjudication committee for Octapharma. All payments  
12  
13 are made to her institution. **SM** reports grants and personal fees from Daiichi-Sankyo, Bayer, Pfizer,  
14  
15 and Boehringer-Ingelheim, personal fees from Portola/Alexion, Abbvie, Pfizer/ Bristol-Meyers  
16  
17 Squibb, Norgine, Viatris, and Sanofi, all paid to her institution and outside the submitted work. **MVH**  
18  
19 reports grants from Dutch Heart Foundation, Netherlands Organisation for Health Research and  
20  
21 Development, Bayer Health Care, Pfizer-BMS Leo Pharma Boehringer-Ingelheim, all outside this  
22  
23 work. **FAK** reports grants or contracts from Bayer, BMS, BSCI, MSD, Leo Pharma, Actelion, Farm-X,  
24  
25 The Netherlands Organisation for Health Research and Development, the Dutch Thrombosis  
26  
27 Association, The Dutch Heart Foundation and the Horizon Europe Program, all unrelated to this work  
28  
29 and paid to his institution. All others report no conflicts of interest related to this project.  
30  
31  
32  
33  
34  
35  
36  
37  
38  
39  
40  
41  
42  
43  
44  
45  
46  
47  
48  
49  
50  
51  
52  
53  
54  
55  
56  
57  
58  
59  
60

1  
2  
3 **FIGURES**  
4  
5

6 **Figure 1. Design of the L-TRRiP study**  
7  
8  
9  
10  
11  
12  
13  
14  
15  
16  
17  
18  
19  
20  
21  
22  
23  
24  
25  
26  
27  
28  
29  
30  
31  
32  
33  
34  
35  
36  
37  
38  
39  
40  
41  
42  
43  
44  
45  
46  
47  
48  
49  
50  
51  
52  
53  
54  
55  
56  
57  
58  
59  
60

For peer review only

## TABLES

Table 1. L-TRRiP model

| Factor                                                   | Coefficient                                                                                                                                                           |
|----------------------------------------------------------|-----------------------------------------------------------------------------------------------------------------------------------------------------------------------|
| Male sex                                                 | 0.63                                                                                                                                                                  |
| Type of first VTE                                        |                                                                                                                                                                       |
| PE                                                       | -0.61                                                                                                                                                                 |
| PE + DVT                                                 | 0.32                                                                                                                                                                  |
| Location of DVT                                          |                                                                                                                                                                       |
| Popliteal DVT <sup>a</sup>                               | -0.46                                                                                                                                                                 |
| Surgery <sup>b</sup>                                     | -0.51                                                                                                                                                                 |
| Pregnancy/puerperium <sup>b</sup>                        | -1.49                                                                                                                                                                 |
| Hormone use <sup>c</sup>                                 | -0.67                                                                                                                                                                 |
| Plaster cast <sup>b</sup>                                | -0.79                                                                                                                                                                 |
| Immobility in bed, in hospital <sup>b, d</sup>           | -0.31                                                                                                                                                                 |
| History of cardiovascular disease <sup>e</sup>           | -0.35                                                                                                                                                                 |
| Blood group, non-O                                       | 0.24                                                                                                                                                                  |
| Factor V Leiden mutation <sup>f</sup>                    | 0.40                                                                                                                                                                  |
| <b>Calculation of the L-TRRiP score</b>                  |                                                                                                                                                                       |
| Prognostic score                                         | Beta1*x1 + beta2*x2 + beta3*x3 + .... The x1, x2, x3, etc. represent the factors in the model, and beta1, beta2, beta3 etc. represent the corresponding coefficients. |
| Absolute 2-years risk of VTE recurrence                  | 1- 0.9235595 <sup>exp</sup> (prognostic score)                                                                                                                        |
| <b>Classification of patients with the L-TRRiP score</b> |                                                                                                                                                                       |
| Low recurrent VTE risk                                   | 2-years risk < 0.06                                                                                                                                                   |
| Intermediate recurrent VTE risk                          | 2-years risk 0.06 - 0.14                                                                                                                                              |
| High recurrent VTE risk                                  | 2-years risk > 0.14                                                                                                                                                   |

Table adapted from Timp et al.(17)

<sup>a</sup> Indicates DVT at the level of the vena poplitea or below. <sup>b</sup> Within three months before VTE. <sup>c</sup> Use of hormonal contraceptives or hormone replacement therapy at the time of VTE. <sup>d</sup> Confinement to bed  $\geq$  3 days. <sup>e</sup> Including a history of heart failure, angina pectoris, peripheral artery vascular disease (claudication), acute myocardial infarction. <sup>f</sup> Homozygous or heterozygous.



**Table 2. VTE-BLEED model**

| Factor                                                    | Score           |
|-----------------------------------------------------------|-----------------|
| Active cancer <sup>a</sup>                                | 2               |
| Male with uncontrolled arterial hypertension <sup>b</sup> | 1               |
| Anaemia <sup>c</sup>                                      | 1.5             |
| History of bleeding <sup>d</sup>                          | 1.5             |
| Age ≥ 60 years old                                        | 1.5             |
| Renal dysfunction <sup>e</sup>                            | 1.5             |
| Classification of patients with the VTE-BLEED score       |                 |
| Low bleeding risk                                         | Total score < 2 |
| High bleeding risk                                        | Total score ≥ 2 |

Table adapted from Klok et al.(35)

<sup>a</sup> Cancer diagnosed within six months before diagnosis of VTE (excluding basal-cell or squamous-cell carcinoma of the skin), recently recurrent or progressive cancer or any cancer that required anti-cancer treatment within six months before the VTE was diagnosed. <sup>b</sup> Value of systolic blood pressure ≥ 140 mmHg at baseline. <sup>c</sup> Haemoglobin < 13 g/dl in men or < 12 g/dl in women. <sup>d</sup> Including prior major or non-major clinically relevant bleeding events, rectal bleeding (more than spotting on toilet paper), frequent nose bleeding or haematuria. <sup>e</sup> Estimated glomerular filtration rate (eGFR) < 60 ml/min at baseline (calculated with Cockcroft-Gault formula).

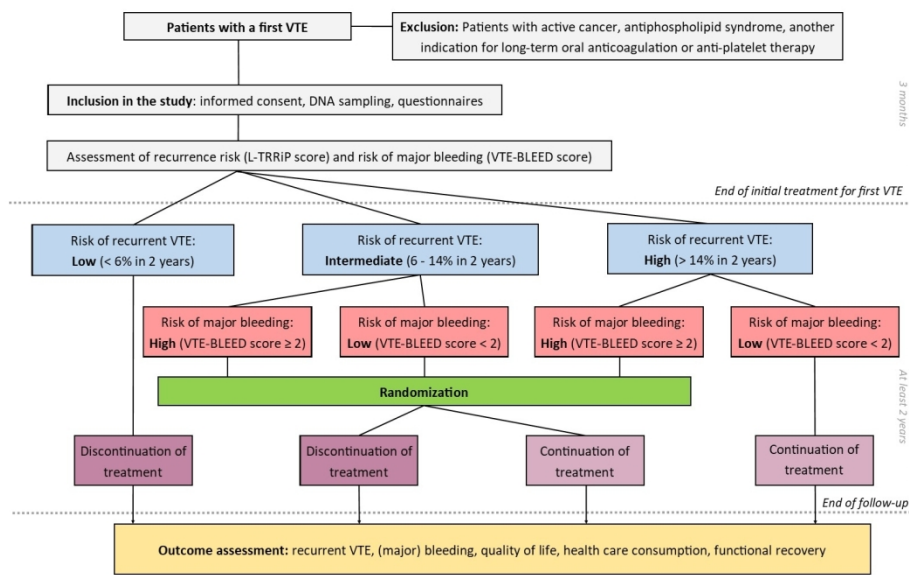

Design of the L-TRRiP study

297x209mm (150 x 150 DPI)

## Appendix I - Contributors L-TRRiP study; version December 2023

### Participating centres:

#### **Adrz, Goes**

- Yavuz Bilgin
- Marleen Goddrie
- Pieter Jobse
- Suzanne Jong
- Saskia Kuipers
- Brianne Murphy
- Carolien van Netten

#### **Amphia Ziekenhuis, Breda**

- Carla Boekholt
- Coen van Guldener
- Danick Werner

#### **Amsterdam University Medical Centers, Amsterdam**

- Michiel Coppens
- Nick van Es

#### **Catharina Ziekenhuis, Eindhoven**

- Laura Kratz
- Marjolein Kremers
- Monique Schilders

#### **Deventer Ziekenhuis**

- Gideon Hajer
- Bas Langeveld
- Saskia Teunisse – de Recht

#### **Diakonessenhuis, Utrecht**

- Annemiek Bogerd
- Ymke Broers
- Stan Kolman
- Marcel A van de Ree
- Sanjay Sankatsing

#### **Groene Hart Ziekenhuis, Gouda**

- Marissa Cloos - van Balen
- Ted Koster
- Lenneke van Tol

**Haaglanden Medisch Centrum, the Hague**

- Edith Beishuizen
- Yvonne Ende - Verhaar
- Milou Stals

**Haga Teaching Hospital, the Hague**

- Shantie Bharatsingh
- Edith Boersma
- Annemarie van der Kraan - Donker
- Albert T A Mairuhu
- Rick Roos

**Ikazia ziekenhuis, Rotterdam**

- Sabine van Arnhem
- Fransien Croon - de Boer
- Ad Dees
- Matthijs Eefting
- J P (Hanneke) van Embden
- Roxane Heller
- Merel Hoogendorp
- Roel Jonkhoff
- Roel J J M van de Laar
- Corry Leunis - de Ruitter
- Patricia Scherpenisse – Klopstra

**Isala, Zwolle**

- Jan-Willem K van den Berg
- Tom L H Stellema
- Kim Warink

**Leiden University Medical Centre, Leiden**

- M Elske van den Akker - van Marle
- Lizanne E van den Akker
- J Louise I Burggraaf
- Eleonora C Camilleri
- Suzanne C Cannegieter
- Tess R C Huibregtse
- Menno V Huisman
- Ingeborg de Jonge
- Frederikus A Klok
- Ruben Y Kok
- Inger N Kunnekes
- Saskia le Cessie
- Dieuwke Luijten
- Lejla Mahic
- Hinke C Nagtegaal

- Petra J Noordijk
- Hülya Öztürk
- Alexia M van der Ploeg
- Nienke van Rein
- Vibeke Schmidt
- Anne-Marie Schuitemaker
- Vera C Slootweg
- Mark J R Smeets
- Milou Thibaudier

#### **Martini Ziekenhuis, Groningen**

- Coty Y Bruggeman
- Annette W G van der Velden

#### **Nij Smellinghe Ziekenhuis, Drachten**

- Marco Dam
- Swopkje de Jong
- Cees Kroon
- Hanneke van der Velde

#### **Radboud University Medical Center, Nijmegen**

- Evertine Abbink
- Jenneke Leentjens
- Saskia Middeldorp

#### **Rode Kruis Ziekenhuis, Beverwijk**

- Carlinda Bresser
- Laura M Faber
- Fleur Kleijwegt
- Tjerk de Nijs
- Simone Sissing

#### **University Medical Center Groningen, Groningen**

- Soerajja Bhoelan
- Tessa Elling
- Èmese Heijkoop
- Francien Huisman
- Mark Lenssen
- Anja B U Makelburg
- Karina Meijer
- Karen H Thedinga
- Marja A J Voskuilen
- Femke Yspeerd

#### **Wilhelmina Ziekenhuis, Assen**

- Sandra Brookman

- Titia Lamberts
- Inge Paas
- Janneke Swart – Heikens

**Ziekenhuis Gelderse Vallei, Ede**

- Remy H H Bemelmans
- Janneke van den Brink
- Wouter K de Jong
- Aline van de Vendel

**Independent physician:**

- Marieke J.H. Wermer, department of neurology, Leiden university Medical Center
- Ellis S. van Etten, department of neurology, Leiden university Medical Center

# Reporting checklist for protocol of a clinical trial.

Based on the SPIRIT guidelines.

## Instructions to authors

Complete this checklist by entering the page numbers from your manuscript where readers will find each of the items listed below.

Your article may not currently address all the items on the checklist. Please modify your text to include the missing information. If you are certain that an item does not apply, please write "n/a" and provide a short explanation.

Upload your completed checklist as an extra file when you submit to a journal.

In your methods section, say that you used the SPIRIT reporting guidelines, and cite them as:

Chan A-W, Tetzlaff JM, Gøtzsche PC, Altman DG, Mann H, Berlin J, Dickersin K, Hróbjartsson A, Schulz KF, Parulekar WR, Krleža-Jerić K, Laupacis A, Moher D. SPIRIT 2013 Explanation and Elaboration: Guidance for protocols of clinical trials. *BMJ*. 2013;346:e7586

|                                   |                     | Reporting Item                                                                                               | Page Number                                                                       |
|-----------------------------------|---------------------|--------------------------------------------------------------------------------------------------------------|-----------------------------------------------------------------------------------|
| <b>Administrative information</b> |                     |                                                                                                              |                                                                                   |
| Title                             | <a href="#">#1</a>  | Descriptive title identifying the study design, population, interventions, and, if applicable, trial acronym | 1                                                                                 |
| Trial registration                | <a href="#">#2a</a> | Trial identifier and registry name. If not yet registered, name of intended registry                         | 4 and 10                                                                          |
| Trial registration: data set      | <a href="#">#2b</a> | All items from the World Health Organization Trial Registration Data Set                                     | See trial register                                                                |
| Protocol version                  | <a href="#">#3</a>  | Date and version identifier                                                                                  | n/a for manuscript, current version of MREC approved protocol is 1.6 (21-09-2023) |
| Funding                           | <a href="#">#4</a>  | Sources and types of financial, material, and other support                                                  | 23                                                                                |

|    |                      |                     |                                           |                          |
|----|----------------------|---------------------|-------------------------------------------|--------------------------|
| 1  | Roles and            | <a href="#">#5a</a> | Names, affiliations, and roles of         | 1, 23                    |
| 2  | responsibilities:    |                     | protocol contributors                     |                          |
| 3  | contributorship      |                     |                                           |                          |
| 4  |                      |                     |                                           |                          |
| 5  |                      |                     |                                           |                          |
| 6  | Roles and            | <a href="#">#5b</a> | Name and contact information for the      | 2 (corresponding author) |
| 7  | responsibilities:    |                     | trial sponsor                             |                          |
| 8  | sponsor contact      |                     |                                           |                          |
| 9  | information          |                     |                                           |                          |
| 10 |                      |                     |                                           |                          |
| 11 |                      |                     |                                           |                          |
| 12 |                      |                     |                                           |                          |
| 13 | Roles and            | <a href="#">#5c</a> | Role of study sponsor and funders, if     | 23                       |
| 14 | responsibilities:    |                     | any, in study design; collection,         |                          |
| 15 | sponsor and funder   |                     | management, analysis, and                 |                          |
| 16 |                      |                     | interpretation of data; writing of the    |                          |
| 17 |                      |                     | report; and the decision to submit the    |                          |
| 18 |                      |                     | report for publication, including whether |                          |
| 19 |                      |                     | they will have ultimate authority over    |                          |
| 20 |                      |                     | any of these activities                   |                          |
| 21 |                      |                     |                                           |                          |
| 22 |                      |                     |                                           |                          |
| 23 |                      |                     |                                           |                          |
| 24 |                      |                     |                                           |                          |
| 25 |                      |                     |                                           |                          |
| 26 | Roles and            | <a href="#">#5d</a> | Composition, roles, and responsibilities  | See methods (p9-15)      |
| 27 | responsibilities:    |                     | of the coordinating centre, steering      |                          |
| 28 | committees           |                     | committee, endpoint adjudication          |                          |
| 29 |                      |                     | committee, data management team,          |                          |
| 30 |                      |                     | and other individuals or groups           |                          |
| 31 |                      |                     | overseeing the trial, if applicable (see  |                          |
| 32 |                      |                     | Item 21a for data monitoring              |                          |
| 33 |                      |                     | committee)                                |                          |
| 34 |                      |                     |                                           |                          |
| 35 |                      |                     |                                           |                          |
| 36 |                      |                     |                                           |                          |
| 37 |                      |                     |                                           |                          |
| 38 |                      |                     |                                           |                          |
| 39 | <b>Introduction</b>  |                     |                                           |                          |
| 40 |                      |                     |                                           |                          |
| 41 | Background and       | <a href="#">#6a</a> | Description of research question and      | 6-9                      |
| 42 | rationale            |                     | justification for undertaking the trial,  |                          |
| 43 |                      |                     | including summary of relevant studies     |                          |
| 44 |                      |                     | (published and unpublished) examining     |                          |
| 45 |                      |                     | benefits and harms for each               |                          |
| 46 |                      |                     | intervention                              |                          |
| 47 |                      |                     |                                           |                          |
| 48 |                      |                     |                                           |                          |
| 49 |                      |                     |                                           |                          |
| 50 |                      |                     |                                           |                          |
| 51 | Background and       | <a href="#">#6b</a> | Explanation for choice of comparators     | 6-9                      |
| 52 | rationale: choice of |                     |                                           |                          |
| 53 | comparators          |                     |                                           |                          |
| 54 |                      |                     |                                           |                          |
| 55 |                      |                     |                                           |                          |
| 56 | Objectives           | <a href="#">#7</a>  | Specific objectives or hypotheses         | 9                        |
| 57 |                      |                     |                                           |                          |
| 58 |                      |                     |                                           |                          |
| 59 |                      |                     |                                           |                          |
| 60 |                      |                     |                                           |                          |



|    |                           |                      |                                            |       |
|----|---------------------------|----------------------|--------------------------------------------|-------|
| 1  | Trial design              | <a href="#">#8</a>   | Description of trial design including      | 9-10  |
| 2  |                           |                      | type of trial (eg, parallel group,         |       |
| 3  |                           |                      | crossover, factorial, single group),       |       |
| 4  |                           |                      | allocation ratio, and framework (eg,       |       |
| 5  |                           |                      | superiority, equivalence, non-inferiority, |       |
| 6  |                           |                      | exploratory)                               |       |
| 7  |                           |                      |                                            |       |
| 8  |                           |                      |                                            |       |
| 9  |                           |                      |                                            |       |
| 10 |                           |                      |                                            |       |
| 11 | <b>Methods:</b>           |                      |                                            |       |
| 12 | <b>Participants,</b>      |                      |                                            |       |
| 13 | <b>interventions, and</b> |                      |                                            |       |
| 14 | <b>outcomes</b>           |                      |                                            |       |
| 15 |                           |                      |                                            |       |
| 16 |                           |                      |                                            |       |
| 17 | Study setting             | <a href="#">#9</a>   | Description of study settings (eg,         | 9-10  |
| 18 |                           |                      | community clinic, academic hospital)       |       |
| 19 |                           |                      | and list of countries where data will be   |       |
| 20 |                           |                      | collected. Reference to where list of      |       |
| 21 |                           |                      | study sites can be obtained                |       |
| 22 |                           |                      |                                            |       |
| 23 |                           |                      |                                            |       |
| 24 |                           |                      |                                            |       |
| 25 |                           |                      |                                            |       |
| 26 | Eligibility criteria      | <a href="#">#10</a>  | Inclusion and exclusion criteria for       | 10-11 |
| 27 |                           |                      | participants. If applicable, eligibility   |       |
| 28 |                           |                      | criteria for study centres and individuals |       |
| 29 |                           |                      | who will perform the interventions (eg,    |       |
| 30 |                           |                      | surgeons, psychotherapists)                |       |
| 31 |                           |                      |                                            |       |
| 32 |                           |                      |                                            |       |
| 33 |                           |                      |                                            |       |
| 34 | Interventions:            | <a href="#">#11a</a> | Interventions for each group with          | 11-12 |
| 35 | description               |                      | sufficient detail to allow replication,    |       |
| 36 |                           |                      | including how and when they will be        |       |
| 37 |                           |                      | administered                               |       |
| 38 |                           |                      |                                            |       |
| 39 |                           |                      |                                            |       |
| 40 |                           |                      |                                            |       |
| 41 | Interventions:            | <a href="#">#11b</a> | Criteria for discontinuing or modifying    | 11-12 |
| 42 | modifications             |                      | allocated interventions for a given trial  |       |
| 43 |                           |                      | participant (eg, drug dose change in       |       |
| 44 |                           |                      | response to harms, participant request,    |       |
| 45 |                           |                      | or improving / worsening disease)          |       |
| 46 |                           |                      |                                            |       |
| 47 |                           |                      |                                            |       |
| 48 |                           |                      |                                            |       |
| 49 | Interventions:            | <a href="#">#11c</a> | Strategies to improve adherence to         | 12-13 |
| 50 | adherence                 |                      | intervention protocols, and any            |       |
| 51 |                           |                      | procedures for monitoring adherence        |       |
| 52 |                           |                      | (eg, drug tablet return; laboratory tests) |       |
| 53 |                           |                      |                                            |       |
| 54 |                           |                      |                                            |       |
| 55 |                           |                      |                                            |       |
| 56 |                           |                      |                                            |       |
| 57 |                           |                      |                                            |       |
| 58 |                           |                      |                                            |       |
| 59 |                           |                      |                                            |       |
| 60 |                           |                      |                                            |       |

|    |                           |                      |                                          |                                |
|----|---------------------------|----------------------|------------------------------------------|--------------------------------|
| 1  | Interventions:            | <a href="#">#11d</a> | Relevant concomitant care and            | n/a, no restriction to routine |
| 2  | concomitant care          |                      | interventions that are permitted or      | care are made in the trial     |
| 3  |                           |                      | prohibited during the trial              |                                |
| 4  |                           |                      |                                          |                                |
| 5  |                           |                      |                                          |                                |
| 6  | Outcomes                  | <a href="#">#12</a>  | Primary, secondary, and other            | 14-15                          |
| 7  |                           |                      | outcomes, including the specific         |                                |
| 8  |                           |                      | measurement variable (eg, systolic       |                                |
| 9  |                           |                      | blood pressure), analysis metric (eg,    |                                |
| 10 |                           |                      | change from baseline, final value, time  |                                |
| 11 |                           |                      | to event), method of aggregation (eg,    |                                |
| 12 |                           |                      | median, proportion), and time point for  |                                |
| 13 |                           |                      | each outcome. Explanation of the         |                                |
| 14 |                           |                      | clinical relevance of chosen efficacy    |                                |
| 15 |                           |                      | and harm outcomes is strongly            |                                |
| 16 |                           |                      | recommended                              |                                |
| 17 |                           |                      |                                          |                                |
| 18 |                           |                      |                                          |                                |
| 19 |                           |                      |                                          |                                |
| 20 |                           |                      |                                          |                                |
| 21 |                           |                      |                                          |                                |
| 22 |                           |                      |                                          |                                |
| 23 | Participant timeline      | <a href="#">#13</a>  | Time schedule of enrolment,              | 11-13                          |
| 24 |                           |                      | interventions (including any run-ins and |                                |
| 25 |                           |                      | washouts), assessments, and visits for   |                                |
| 26 |                           |                      | participants. A schematic diagram is     |                                |
| 27 |                           |                      | highly recommended (see Figure)          |                                |
| 28 |                           |                      |                                          |                                |
| 29 |                           |                      |                                          |                                |
| 30 |                           |                      |                                          |                                |
| 31 |                           |                      |                                          |                                |
| 32 | Sample size               | <a href="#">#14</a>  | Estimated number of participants         | 15-16                          |
| 33 |                           |                      | needed to achieve study objectives and   |                                |
| 34 |                           |                      | how it was determined, including         |                                |
| 35 |                           |                      | clinical and statistical assumptions     |                                |
| 36 |                           |                      | supporting any sample size               |                                |
| 37 |                           |                      | calculations                             |                                |
| 38 |                           |                      |                                          |                                |
| 39 |                           |                      |                                          |                                |
| 40 |                           |                      |                                          |                                |
| 41 |                           |                      |                                          |                                |
| 42 | Recruitment               | <a href="#">#15</a>  | Strategies for achieving adequate        | 9                              |
| 43 |                           |                      | participant enrolment to reach target    |                                |
| 44 |                           |                      | sample size                              |                                |
| 45 |                           |                      |                                          |                                |
| 46 |                           |                      |                                          |                                |
| 47 | <b>Methods:</b>           |                      |                                          |                                |
| 48 | <b>Assignment of</b>      |                      |                                          |                                |
| 49 | <b>interventions (for</b> |                      |                                          |                                |
| 50 | <b>controlled trials)</b> |                      |                                          |                                |
| 51 |                           |                      |                                          |                                |
| 52 |                           |                      |                                          |                                |
| 53 |                           |                      |                                          |                                |
| 54 | Allocation:               | <a href="#">#16a</a> | Method of generating the allocation      | 12                             |
| 55 | sequence                  |                      | sequence (eg, computer-generated         |                                |
| 56 | generation                |                      | random numbers), and list of any         |                                |
| 57 |                           |                      | factors for stratification. To reduce    |                                |
| 58 |                           |                      |                                          |                                |
| 59 |                           |                      |                                          |                                |
| 60 |                           |                      |                                          |                                |

1 predictability of a random sequence,  
 2 details of any planned restriction (eg,  
 3 blocking) should be provided in a  
 4 separate document that is unavailable  
 5 to those who enrol participants or  
 6 assign interventions  
 7  
 8  
 9

|                                                                            |                      |                                                                                                                                                                                                                                                                                                                         |                                                            |
|----------------------------------------------------------------------------|----------------------|-------------------------------------------------------------------------------------------------------------------------------------------------------------------------------------------------------------------------------------------------------------------------------------------------------------------------|------------------------------------------------------------|
| 10 Allocation concealment mechanism                                        | <a href="#">#16b</a> | Mechanism of implementing the allocation sequence (eg, central telephone; sequentially numbered, opaque, sealed envelopes), describing any steps to conceal the sequence until interventions are assigned                                                                                                               | 12                                                         |
| 11<br>12<br>13<br>14<br>15<br>16<br>17<br>18<br>19                         |                      |                                                                                                                                                                                                                                                                                                                         |                                                            |
| 20 Allocation: implementation                                              | <a href="#">#16c</a> | Who will generate the allocation sequence, who will enrol participants, and who will assign participants to interventions                                                                                                                                                                                               | 12                                                         |
| 21<br>22<br>23<br>24<br>25<br>26                                           |                      |                                                                                                                                                                                                                                                                                                                         |                                                            |
| 27 Blinding (masking)                                                      | <a href="#">#17a</a> | Who will be blinded after assignment to interventions (eg, trial participants, care providers, outcome assessors, data analysts), and how                                                                                                                                                                               | 14 (only outcome adjudication committee is blinded)        |
| 28<br>29<br>30<br>31<br>32                                                 |                      |                                                                                                                                                                                                                                                                                                                         |                                                            |
| 33 Blinding (masking): emergency unblinding                                | <a href="#">#17b</a> | If blinded, circumstances under which unblinding is permissible, and procedure for revealing a participant's allocated intervention during the trial                                                                                                                                                                    | n/a, since patient and treating physicians are not blinded |
| 34<br>35<br>36<br>37<br>38<br>39                                           |                      |                                                                                                                                                                                                                                                                                                                         |                                                            |
| 40 <b>Methods: Data collection, management, and analysis</b>               |                      |                                                                                                                                                                                                                                                                                                                         |                                                            |
| 41<br>42<br>43<br>44<br>45<br>46                                           |                      |                                                                                                                                                                                                                                                                                                                         |                                                            |
| 47 Data collection plan                                                    | <a href="#">#18a</a> | Plans for assessment and collection of outcome, baseline, and other trial data, including any related processes to promote data quality (eg, duplicate measurements, training of assessors) and a description of study instruments (eg, questionnaires, laboratory tests) along with their reliability and validity, if | 14-15                                                      |
| 48<br>49<br>50<br>51<br>52<br>53<br>54<br>55<br>56<br>57<br>58<br>59<br>60 |                      |                                                                                                                                                                                                                                                                                                                         |                                                            |

known. Reference to where data collection forms can be found, if not in the protocol

|    |                      |                      |                                                                    |
|----|----------------------|----------------------|--------------------------------------------------------------------|
| 1  |                      |                      |                                                                    |
| 2  |                      |                      |                                                                    |
| 3  |                      |                      |                                                                    |
| 4  |                      |                      |                                                                    |
| 5  | Data collection      | <a href="#">#18b</a> | Plans to promote participant retention 12-13                       |
| 6  | plan: retention      |                      | and complete follow-up, including list of                          |
| 7  |                      |                      | any outcome data to be collected for                               |
| 8  |                      |                      | participants who discontinue or deviate                            |
| 9  |                      |                      | from intervention protocols                                        |
| 10 |                      |                      |                                                                    |
| 11 |                      |                      |                                                                    |
| 12 |                      |                      |                                                                    |
| 13 | Data management      | <a href="#">#19</a>  | Plans for data entry, coding, security, 15                         |
| 14 |                      |                      | and storage, including any related                                 |
| 15 |                      |                      | processes to promote data quality (eg,                             |
| 16 |                      |                      | double data entry; range checks for                                |
| 17 |                      |                      | data values). Reference to where                                   |
| 18 |                      |                      | details of data management                                         |
| 19 |                      |                      | procedures can be found, if not in the                             |
| 20 |                      |                      | protocol                                                           |
| 21 |                      |                      |                                                                    |
| 22 |                      |                      |                                                                    |
| 23 |                      |                      |                                                                    |
| 24 |                      |                      |                                                                    |
| 25 |                      |                      |                                                                    |
| 26 | Statistics:          | <a href="#">#20a</a> | Statistical methods for analysing 16-18                            |
| 27 | outcomes             |                      | primary and secondary outcomes.                                    |
| 28 |                      |                      | Reference to where other details of the                            |
| 29 |                      |                      | statistical analysis plan can be found, if                         |
| 30 |                      |                      | not in the protocol                                                |
| 31 |                      |                      |                                                                    |
| 32 |                      |                      |                                                                    |
| 33 |                      |                      |                                                                    |
| 34 |                      |                      |                                                                    |
| 35 | Statistics:          | <a href="#">#20b</a> | Methods for any additional analyses 16-18                          |
| 36 | additional analyses  |                      | (eg, subgroup and adjusted analyses)                               |
| 37 |                      |                      |                                                                    |
| 38 |                      |                      |                                                                    |
| 39 | Statistics: analysis | <a href="#">#20c</a> | Definition of analysis population 16-18                            |
| 40 | population and       |                      | relating to protocol non-adherence (eg,                            |
| 41 | missing data         |                      | as randomised analysis), and any                                   |
| 42 |                      |                      | statistical methods to handle missing                              |
| 43 |                      |                      | data (eg, multiple imputation)                                     |
| 44 |                      |                      |                                                                    |
| 45 |                      |                      |                                                                    |
| 46 |                      |                      |                                                                    |
| 47 | <b>Methods:</b>      |                      |                                                                    |
| 48 | <b>Monitoring</b>    |                      |                                                                    |
| 49 |                      |                      |                                                                    |
| 50 |                      |                      |                                                                    |
| 51 | Data monitoring:     | <a href="#">#21a</a> | Composition of data monitoring 18, monitoring of trial             |
| 52 | formal committee     |                      | committee (DMC); summary of its role execution is monitored by     |
| 53 |                      |                      | and reporting structure; statement of monitors from the LUMC;      |
| 54 |                      |                      | whether it is independent from the since this is a neglectable     |
| 55 |                      |                      | sponsor and competing interests; and risk study no data safety     |
| 56 |                      |                      | reference to where further details about monitoring board has been |
| 57 |                      |                      |                                                                    |
| 58 |                      |                      |                                                                    |
| 59 |                      |                      |                                                                    |
| 60 |                      |                      |                                                                    |

|    |                      |                                                                                                            |                                             |
|----|----------------------|------------------------------------------------------------------------------------------------------------|---------------------------------------------|
|    |                      | its charter can be found, if not in the protocol. Alternatively, an explanation of why a DMC is not needed | installed (according to Dutch legislation). |
| 1  |                      |                                                                                                            |                                             |
| 2  |                      |                                                                                                            |                                             |
| 3  |                      |                                                                                                            |                                             |
| 4  |                      |                                                                                                            |                                             |
| 5  | Data monitoring:     | <a href="#">#21b</a> Description of any interim analyses and                                               | n/a, since this is a                        |
| 6  | interim analysis     | stopping guidelines, including who will                                                                    | neglectable risk study no                   |
| 7  |                      | have access to these interim results                                                                       | data safety monitoring board                |
| 8  |                      | and make the final decision to                                                                             | has been installed                          |
| 9  |                      | terminate the trial                                                                                        | (according to Dutch                         |
| 10 |                      |                                                                                                            | legislation).                               |
| 11 |                      |                                                                                                            |                                             |
| 12 |                      |                                                                                                            |                                             |
| 13 |                      |                                                                                                            |                                             |
| 14 |                      |                                                                                                            |                                             |
| 15 | Harms                | <a href="#">#22</a> Plans for collecting, assessing,                                                       | 13                                          |
| 16 |                      | reporting, and managing solicited and                                                                      |                                             |
| 17 |                      | spontaneously reported adverse events                                                                      |                                             |
| 18 |                      | and other unintended effects of trial                                                                      |                                             |
| 19 |                      | interventions or trial conduct                                                                             |                                             |
| 20 |                      |                                                                                                            |                                             |
| 21 |                      |                                                                                                            |                                             |
| 22 |                      |                                                                                                            |                                             |
| 23 | Auditing             | <a href="#">#23</a> Frequency and procedures for auditing                                                  | n.a. no preplanned audits                   |
| 24 |                      | trial conduct, if any, and whether the                                                                     |                                             |
| 25 |                      | process will be independent from                                                                           |                                             |
| 26 |                      | investigators and the sponsor                                                                              |                                             |
| 27 |                      |                                                                                                            |                                             |
| 28 |                      |                                                                                                            |                                             |
| 29 |                      |                                                                                                            |                                             |
| 30 | <b>Ethics and</b>    |                                                                                                            |                                             |
| 31 | <b>dissemination</b> |                                                                                                            |                                             |
| 32 |                      |                                                                                                            |                                             |
| 33 |                      |                                                                                                            |                                             |
| 34 | Research ethics      | <a href="#">#24</a> Plans for seeking research ethics                                                      | 18                                          |
| 35 | approval             | committee / institutional review board                                                                     |                                             |
| 36 |                      | (REC / IRB) approval                                                                                       |                                             |
| 37 |                      |                                                                                                            |                                             |
| 38 |                      |                                                                                                            |                                             |
| 39 | Protocol             | <a href="#">#25</a> Plans for communicating important                                                      | 18 all relevant protocol                    |
| 40 | amendments           | protocol modifications (eg, changes to                                                                     | amendments will be                          |
| 41 |                      | eligibility criteria, outcomes, analyses)                                                                  | reviewed by the MREC                        |
| 42 |                      | to relevant parties (eg, investigators,                                                                    |                                             |
| 43 |                      | REC / IRBs, trial participants, trial                                                                      |                                             |
| 44 |                      | registries, journals, regulators)                                                                          |                                             |
| 45 |                      |                                                                                                            |                                             |
| 46 |                      |                                                                                                            |                                             |
| 47 |                      |                                                                                                            |                                             |
| 48 |                      |                                                                                                            |                                             |
| 49 | Consent or assent    | <a href="#">#26a</a> Who will obtain informed consent or                                                   | 11                                          |
| 50 |                      | assent from potential trial participants                                                                   |                                             |
| 51 |                      | or authorised surrogates, and how (see                                                                     |                                             |
| 52 |                      | Item 32)                                                                                                   |                                             |
| 53 |                      |                                                                                                            |                                             |
| 54 |                      |                                                                                                            |                                             |
| 55 |                      |                                                                                                            |                                             |
| 56 | Consent or assent:   | <a href="#">#26b</a> Additional consent provisions for                                                     | Included in patient                         |
| 57 | ancillary studies    | collection and use of participant data                                                                     | information file                            |
| 58 |                      |                                                                                                            |                                             |
| 59 |                      |                                                                                                            |                                             |
| 60 |                      |                                                                                                            |                                             |

and biological specimens in ancillary studies, if applicable

|    |                       |                      |                                                                   |
|----|-----------------------|----------------------|-------------------------------------------------------------------|
| 1  |                       |                      |                                                                   |
| 2  |                       |                      |                                                                   |
| 3  |                       |                      |                                                                   |
| 4  | Confidentiality       | <a href="#">#27</a>  | How personal information about 15                                 |
| 5  |                       |                      | potential and enrolled participants will                          |
| 6  |                       |                      | be collected, shared, and maintained in                           |
| 7  |                       |                      | order to protect confidentiality before,                          |
| 8  |                       |                      | during, and after the trial                                       |
| 9  |                       |                      |                                                                   |
| 10 |                       |                      |                                                                   |
| 11 |                       |                      |                                                                   |
| 12 | Declaration of        | <a href="#">#28</a>  | Financial and other competing interests 23-24                     |
| 13 | interests             |                      | for principal investigators for the overall                       |
| 14 |                       |                      | trial and each study site                                         |
| 15 |                       |                      |                                                                   |
| 16 |                       |                      |                                                                   |
| 17 | Data access           | <a href="#">#29</a>  | Statement of who will have access to 18                           |
| 18 |                       |                      | the final trial dataset, and disclosure of                        |
| 19 |                       |                      | contractual agreements that limit such                            |
| 20 |                       |                      | access for investigators                                          |
| 21 |                       |                      |                                                                   |
| 22 |                       |                      |                                                                   |
| 23 |                       |                      |                                                                   |
| 24 | Ancillary and post    | <a href="#">#30</a>  | Provisions, if any, for ancillary and According to Dutch laws a   |
| 25 | trial care            |                      | post-trial care, and for compensation to participant insurance is |
| 26 |                       |                      | those who suffer harm from trial available; information on        |
| 27 |                       |                      | participation compensation for injury is                          |
| 28 |                       |                      | included in the patient                                           |
| 29 |                       |                      | information letter (in Dutch)                                     |
| 30 |                       |                      | and available upon request                                        |
| 31 |                       |                      |                                                                   |
| 32 |                       |                      |                                                                   |
| 33 |                       |                      |                                                                   |
| 34 |                       |                      |                                                                   |
| 35 | Dissemination         | <a href="#">#31a</a> | Plans for investigators and sponsor to 18                         |
| 36 | policy: trial results |                      | communicate trial results to                                      |
| 37 |                       |                      | participants, healthcare professionals,                           |
| 38 |                       |                      | the public, and other relevant groups                             |
| 39 |                       |                      | (eg, via publication, reporting in results                        |
| 40 |                       |                      | databases, or other data sharing                                  |
| 41 |                       |                      | arrangements), including any                                      |
| 42 |                       |                      | publication restrictions                                          |
| 43 |                       |                      |                                                                   |
| 44 |                       |                      |                                                                   |
| 45 |                       |                      |                                                                   |
| 46 |                       |                      |                                                                   |
| 47 |                       |                      |                                                                   |
| 48 | Dissemination         | <a href="#">#31b</a> | Authorship eligibility guidelines and any 18                      |
| 49 | policy: authorship    |                      | intended use of professional writers                              |
| 50 |                       |                      |                                                                   |
| 51 |                       |                      |                                                                   |
| 52 | Dissemination         | <a href="#">#31c</a> | Plans, if any, for granting public access 18                      |
| 53 | policy: reproducible  |                      | to the full protocol, participant-level                           |
| 54 | research              |                      | dataset, and statistical code                                     |
| 55 |                       |                      |                                                                   |
| 56 |                       |                      |                                                                   |
| 57 |                       |                      |                                                                   |
| 58 | <b>Appendices</b>     |                      |                                                                   |
| 59 |                       |                      |                                                                   |
| 60 |                       |                      |                                                                   |

|                                                      |                            |                     |                                                                                                                                                                                                |                                  |
|------------------------------------------------------|----------------------------|---------------------|------------------------------------------------------------------------------------------------------------------------------------------------------------------------------------------------|----------------------------------|
| 1<br>2<br>3<br>4<br>5                                | Informed consent materials | <a href="#">#32</a> | Model consent form and other related documentation given to participants and authorised surrogates                                                                                             | See enclosed Subject information |
| 6<br>7<br>8<br>9<br>10<br>11<br>12<br>13<br>14<br>15 | Biological specimens       | <a href="#">#33</a> | Plans for collection, laboratory evaluation, and storage of biological specimens for genetic or molecular analysis in the current trial and for future use in ancillary studies, if applicable | See enclosed subject information |

16 None The SPIRIT Explanation and Elaboration paper is distributed under the terms of the Creative  
17 Commons Attribution License CC-BY-NC. This checklist can be completed online using  
18 <https://www.goodreports.org/>, a tool made by the [EQUATOR Network](#) in collaboration with  
19 [Penelope.ai](#)  
20  
21  
22  
23  
24  
25  
26  
27  
28  
29  
30  
31  
32  
33  
34  
35  
36  
37  
38  
39  
40  
41  
42  
43  
44  
45  
46  
47  
48  
49  
50  
51  
52  
53  
54  
55  
56  
57  
58  
59  
60
