# Supplementary material for: Tailored anticoagulant treatment after a first venous thromboembolism: protocol of the Leiden Thrombosis Recurrence Risk Prevention (L-TRRiP) study - cohort-based randomised controlled trial
Source: PubMed Central journal article supplement — BMJ Open. 2024 Mar 23;14(3):e078676. doi: 10.1136/bmjopen-2023-078676 (PMC10961563; doi:10.1136/bmjopen-2023-078676), 2024-03-23
Supplement: bmjopen-2023-078676supp001.pdf [file bmjopen-2023-078676supp001.pdf]

## Appendix I - Contributors L-TRRiP study; version December 2023

### Participating centres:

#### **Adrz, Goes**

- Yavuz Bilgin
- Marleen Goddrie
- Pieter Jobse
- Suzanne Jong
- Saskia Kuipers
- Brianne Murphy
- Carolien van Netten

#### **Amphia Ziekenhuis, Breda**

- Carla Boekholt
- Coen van Guldener
- Danick Werner

#### **Amsterdam University Medical Centers, Amsterdam**

- Michiel Coppens
- Nick van Es

#### **Catharina Ziekenhuis, Eindhoven**

- Laura Kratz
- Marjolein Kremers
- Monique Schilders

#### **Deventer Ziekenhuis**

- Gideon Hajer
- Bas Langeveld
- Saskia Teunisse – de Recht

#### **Diakonessenhuis, Utrecht**

- Annemiek Bogerd
- Ymke Broers
- Stan Kolman
- Marcel A van de Ree
- Sanjay Sankatsing

#### **Groene Hart Ziekenhuis, Gouda**

- Marissa Cloos - van Balen
- Ted Koster
- Lenneke van Tol

#### **Haaglanden Medisch Centrum, the Hague**

- Edith Beishuizen
- Yvonne Ende - Verhaar

- Milou Stals

**Haga Teaching Hospital, the Hague**

- Shantie Bharatsingh
- Edith Boersma
- Annemarie van der Kraan - Donker
- Albert T A Mairuhu
- Rick Roos

**Ikazia ziekenhuis, Rotterdam**

- Sabine van Arnhem
- Fransien Croon - de Boer
- Ad Dees
- Matthijs Eefting
- J P (Hanneke) van Embden
- Roxane Heller
- Merel Hoogendorp
- Roel Jonkhoff
- Roel J J M van de Laar
- Corry Leunis - de Ruiten
- Patricia Scherpenisse – Klopstra

**Isala, Zwolle**

- Jan-Willem K van den Berg
- Tom L H Stellema
- Kim Warink

**Leiden University Medical Centre, Leiden**

- M Elske van den Akker - van Marle
- Lizanne E van den Akker
- J Louise I Burggraaf
- Eleonora C Camilleri
- Suzanne C Cannegieter
- Tess R C Huibregtse
- Menno V Huisman
- Ingeborg de Jonge
- Frederikus A Klok
- Ruben Y Kok
- Inger N Kunnekes
- Saskia Ie Cessie
- Dieuwke Luijten
- Lejla Mahic
- Hinke C Nagtegaal
- Petra J Noordijk
- Hülya Öztürk
- Alexia M van der Ploeg

- Nienke van Rein
- Vibeke Schmidt
- Anne-Marie Schuitemaker
- Vera C Slootweg
- Mark J R Smeets
- Milou Thibaudier

**Martini Ziekenhuis, Groningen**

- Coty Y Bruggeman
- Annette W G van der Velden

**Nij Smellinghe Ziekenhuis, Drachten**

- Marco Dam
- Swopkje de Jong
- Cees Kroon
- Hanneke van der Velde

**Radboud University Medical Center, Nijmegen**

- Evertine Abbink
- Jenneke Leentjens
- Saskia Middeldorp

**Rode Kruis Ziekenhuis, Beverwijk**

- Carlinda Bresser
- Laura M Faber
- Fleur Kleijwegt
- Tjerk de Nijs
- Simone Sissing

**University Medical Center Groningen, Groningen**

- Soerajja Bhoelan
- Tessa Elling
- Èmese Heijkoop
- Francien Huisman
- Mark Lenssen
- Anja B U Makelburg
- Karina Meijer
- Karen H Thedinga
- Marja A J Voskuilen
- Femke Yspeerd

**Wilhelmina Ziekenhuis, Assen**

- Sandra Brookman
- Titia Lamberts
- Inge Paas
- Janneke Swart – Heikens

**Ziekenhuis Gelderse Vallei, Ede**

- Remy H H Bemelmans
- Janneke van den Brink
- Wouter K de Jong
- Aline van de Vendel

**Independent physician:**

- Marieke J.H. Wermer, department of neurology, Leiden university Medical Center
- Ellis S. van Etten, department of neurology, Leiden university Medical Center
